# Supplementary material
Source: PubMed Central journal article supplement (PMC4016990)
Supplement: NIHMS568254-supplement-1.pdf [file NIHMS568254-supplement-1.pdf]

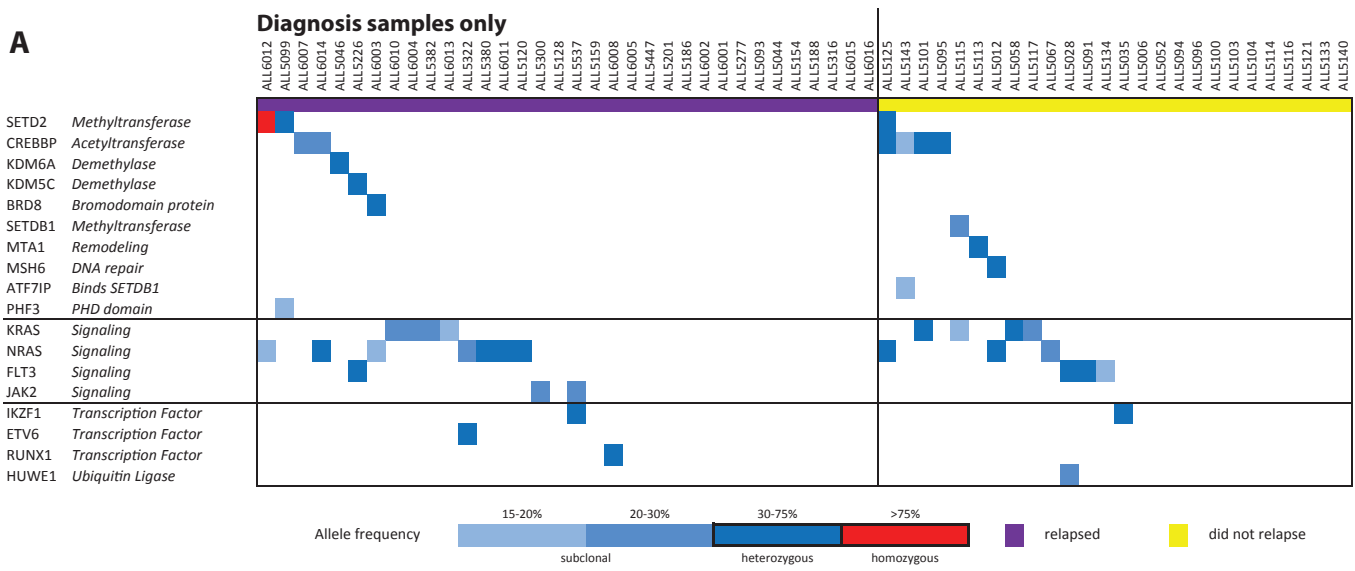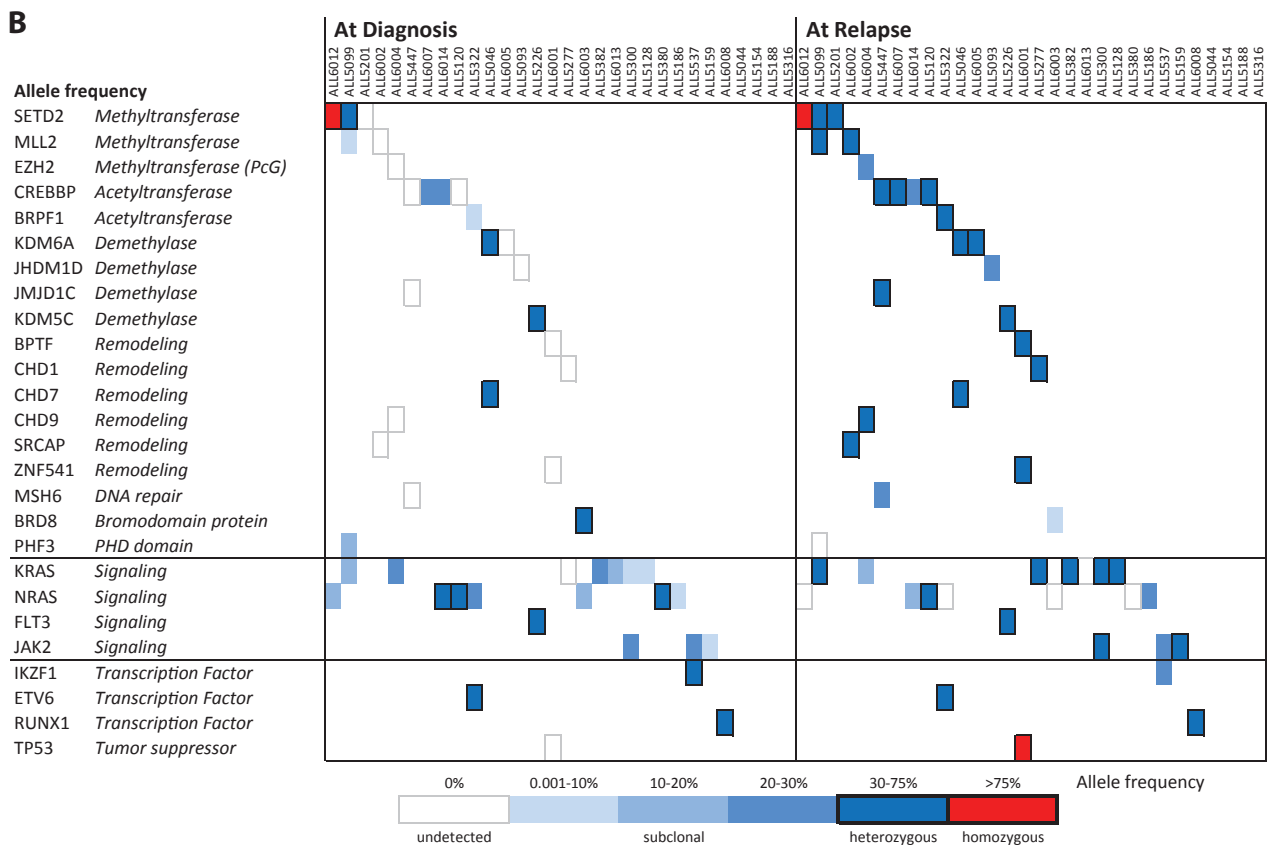

**Supplementary Figure 1.** Variant allele frequencies for somatic mutations. **A)** Matched diagnosis and remission sample pairs from 60 pediatric B-ALL patients were baited with target hybrid capture, Illumina sequenced and somatic mutations were identified. Patients are organized by those that eventually relapsed (on the left), and those that did not (on the right). Each box is shaded by the variant allele frequency of each mutation at diagnosis. **B)** Matched diagnosis, remission and relapse samples from 30 pediatric B-ALL patients were sequenced with targeted hybrid capture and somatic mutations were identified. Genes on the left are organized by functional class, and grouped by epigenetic regulators, signaling factors and others. Each box is shaded by the allele frequency of each mutation at diagnosis (on the left) and at relapse (on the right). Subclonal and undetectable mutations which had significant allele frequency (>15%) in the matched leukemia samples are indicated by lighter shades of blue and empty boxes.

**Supplementary Table 1: Genes included in epigenetic custom capture baitset**

|          |          |          |          |         |        |           |           |
|----------|----------|----------|----------|---------|--------|-----------|-----------|
| AADAT    | AANAT    | AIRE     | AKAP1    | AKT1    | ALG13  | ARID1A    | ARID1B    |
| ARID2    | ARID4A   | ARID4B   | AS3MT    | ASF1A   | ASF1B  | ASH1L     | ASH2L     |
| ASXL1    | ASXL2    | ASXL3    | ATAD2    | ATAD2B  | ATF7IP | ATRX      | AURKA     |
| AURKB    | AURKC    | BAZ1A    | BAZ1B    | BAZ2A   | BAZ2B  | BHMT      | BLNK      |
| BMI1     | BPTF     | BRD1     | BRD2     | BRD3    | BRD4   | BRD7      | BRD8      |
| BRD9     | BRDT     | BRPF1    | BRPF3    | BRWD1   | BRWD3  | C14orf106 | C14orf169 |
| C14orf43 | C16orf53 | C20orf20 | C2orf60  | CARM1   | CBL    | CBX1      | CBX2      |
| CBX3     | CBX4     | CBX5     | CBX6     | CBX7    | CBX8   | CCBL2     | CDC73     |
| CDKN2A   | CDYL     | CDYL2    | CEBPA    | CECR2   | CHAF1A | CHAF1B    | CHD1      |
| CHD1L    | CHD2     | CHD3     | CHD4     | CHD5    | CHD6   | CHD7      | CHD8      |
| CHD9     | CHMP1B   | CHMP2A   | CHMP4B   | CHMP4C  | CHMP5  | CHRA1     | CLOCK     |
| COQ3     | CRAMP1L  | CREBBP   | CRLF2    | CSNK2A1 | CTCF   | CTR9      | CXXC1     |
| DIDO1    | DMAP1    | DNAJC1   | DNAJC2   | DNMT1   | DNMT3A | DNMT3B    | DNMT3L    |
| DOT1L    | DPF1     | DPF2     | DPF3     | DPY30   | EBF1   | EDF1      | EED       |
| EHMT1    | EHMT2    | ELP3     | EP300    | EP400   | EPC1   | EPC2      | ETV6      |
| EZH1     | EZH2     | FBXL19   | FBXO11   | FBXW7   | FLT3   | FOS       | G2E3      |
| GAMT     | GART     | GATAD2A  | GSG2     | GTF3C4  | HAT1   | HDAC1     | HDAC10    |
| HDAC11   | HDAC2    | HDAC3    | HDAC4    | HDAC5   | HDAC6  | HDAC7     | HDAC8     |
| HDAC9    | HELLS    | HEMK1    | HIF1AN   | HIRA    | HLTF   | HMGA1     | HMGN3     |
| HMGN5    | HR       | HSPBAP1  | HUWE1    | IDH1    | IDH2   | IKZF1     | IKZF2     |
| IKZF3    | ING1     | ING2     | ING3     | ING4    | ING5   | INO80     | INTS12    |
| JAK1     | JAK2     | JAK3     | JARID2   | JHDM1D  | JMJD1C | JMJD4     | JMJD5     |
| JMJD6    | JMJD7    | JMJD8    | KAT2A    | KAT2B   | KAT5   | KCNN3     | KDM1A     |
| KDM1B    | KDM2A    | KDM2B    | KDM3A    | KDM3B   | KDM4A  | KDM4B     | KDM4C     |
| KDM4D    | KDM4DL   | KDM5A    | KDM5B    | KDM5C   | KDM5D  | KDM6A     | KDM6B     |
| KIT      | KRAS     | LBR      | LCMT1    | LEF1    | LEO1   | LIN28     | LMO2      |
| MAP3K12  | MBD1     | MBD2     | MBD3     | MBD4    | MBD5   | MBD6      | MECOM     |
| MECP2    | MEN1     | METTL1   | METTL8   | MGMT    | MIER1  | MIER2     | MIER3     |
| MINA     | MLL      | MLL2     | MLL3     | MLL4    | MLL5   | MLLT1     | MLLT10    |
| MLLT3    | MLLT6    | MORF4L1  | MPHOSPH8 | MSH6    | MSL3   | MST1      | MTA1      |
| MTA2     | MTA3     | MTF2     | MYSM1    | MYST1   | MYST2  | MYST3     | MYST4     |
| N6AMT1   | N6AMT2   | NAP1L1   | NAP1L2   | NAP1L3  | NAP1L4 | NAP1L5    | NCOA3     |
| NCOR1    | NCOR2    | NNMT     | NOC2L    | NOTCH1  | NPM1   | NPTXR     | NRAS      |
| NSD1     | NSUN2    | NSUN5    | PADI4    | PAF1    | PAXIP1 | PBRM1     | PCGF1     |
| PCGF2    | PCGF6    | PCMT1    | PDC      | PEMT    | PHB    | PHC2      | PHC3      |
| PHF1     | PHF10    | PHF11    | PHF12    | PHF13   | PHF14  | PHF15     | PHF16     |
| PHF17    | PHF19    | PHF2     | PHF20    | PHF20L1 | PHF21A | PHF21B    | PHF23     |
| PHF3     | PHF6     | PHF7     | PHF8     | PHIP    | PHRF1  | PICK1     | PML       |
| PNMT     | POLR2A   | PPARG    | PPARGC1A | PRDM1   | PRDM10 | PRDM11    | PRDM12    |
| PRDM13   | PRDM14   | PRDM15   | PRDM16   | PRDM2   | PRDM4  | PRDM5     | PRDM6     |
| PRDM7    | PRDM8    | PRDM9    | PRMT1    | PRMT2   | PRMT3  | PRMT5     | PRMT6     |

|          |         |         |         |         |         |         |          |
|----------|---------|---------|---------|---------|---------|---------|----------|
| PRMT7    | PRMT8   | PTEN    | PWWP2B  | PYGO1   | PYGO2   | RAI1    | RB1      |
| RBBP5    | RBM14   | RCOR1   | RCOR2   | RCOR3   | RERE    | RING1   | RNF17    |
| RNF2     | RNF20   | RNF40   | RNMT    | RPS6KA5 | RRP8    | RSF1    | RUNX1    |
| SAP18    | SAT1    | SATB1   | SATB2   | SET     | SETD1A  | SETD1B  | SETD2    |
| SETD3    | SETD4   | SETD5   | SETD6   | SETD7   | SETD8   | SETDB1  | SETDB2   |
| SETMAR   | SHPRH   | SIN3A   | SIN3B   | SIRT1   | SIRT2   | SIRT3   | SIRT4    |
| SIRT5    | SIRT6   | SIRT7   | SMARCA1 | SMARCA2 | SMARCA4 | SMARCA5 | SMARCAD1 |
| SMARCAL1 | SMARCB1 | SMARCC1 | SMARCC2 | SMARCD1 | SMARCD2 | SMARCD3 | SMARCE1  |
| SMC1A    | SMC1B   | SMC2    | SMC3    | SMC4    | SMN1    | SMNDC1  | SMYD1    |
| SMYD2    | SMYD3   | SMYD4   | SMYD5   | SND1    | SP100   | SP110   | SP140    |
| SP140L   | SRCAP   | STK31   | SUDS3   | SUPT7L  | SUV39H1 | SUV39H2 | SUV420H1 |
| SUV420H2 | SUZ12   | TADA2A  | TADA2B  | TAF1    | TAF1L   | TAF3    | TAF5     |
| TAF6L    | TAF8    | TCF20   | TDRD1   | TDRD3   | TDRD5   | TDRD6   | TDRD7    |
| TDRD9    | TDRKH   | TERF2   | TET1    | TET2    | TET3    | TGFB1   | TP53     |
| TPMT     | TRAF7   | TRDMT1  | TRERF1  | TRIM24  | TRIM28  | TRIM33  | TRIM66   |
| TRMT2B   | TTF1    | UBE2A   | UBE2B   | UBE2E1  | UBE2I   | UBE2N   | UBE2V1   |
| UBR7     | UHRF1   | UHRF2   | UTY     | WBSR22  | WDR5    | WDR82   | WHSC1    |
| WHSC1L1  | WT1     | YEATS2  | YEATS4  | ZCWPW1  | ZMYND11 | ZMYND8  | ZNF541   |

## Supplementary Table 2: Patient Characteristics

### Patient Information (Hybrid Capture)

| Patient ID | Treatment Protocol | Age  | Sex | immuno | WBC @ dx | CNS @ Dx  | initial risk | final risk | relapse | Time to Relapse (yrs) | Bone Marrow Relapse | CNS Relapse | Testis Relapse | status | Primary abnormality |
|------------|--------------------|------|-----|--------|----------|-----------|--------------|------------|---------|-----------------------|---------------------|-------------|----------------|--------|---------------------|
| ALL5006    | DFCI 05-001        | 5.7  | M   | B-cell | 5.1      | CNS 1     | SR           | SR         | No      |                       |                     |             |                | Alive  | non-informative     |
| ALL5012    | DFCI 05-001        | 11.8 | M   | B-cell | 2.5      | CNS 1     | HR           | HR         | No      |                       |                     |             |                | Alive  | tetraploidy 21      |
| ALL5028    | DFCI 05-001        | 13.8 | F   | B-cell | 1.5      | CNS 1     | HR           | HR         | No      |                       |                     |             |                | Alive  | Hyperdiploidy > 50  |
| ALL5035    | DFCI 05-001        | 12.7 | M   | B-cell | 7.5      | CNS 2     | HR           | HR         | No      |                       |                     |             |                | Alive  | non-informative     |
| ALL5044    | DFCI 05-001        | 8.5  | M   | B-cell | 4.8      | CNS 1     | SR           | SR         | Yes     | 1.5                   | Yes                 |             |                | Dead   | non-informative     |
| ALL5046    | DFCI 05-001        | 16.7 | F   | B-cell | 27.6     | CNS 1     | HR           | HR         | Yes     | 3.4                   | Yes                 |             |                | Alive  | non-informative     |
| ALL5052    | DFCI 05-001        | 5.8  | F   | B-cell | 13.9     | CNS 1     | SR           | SR         | No      |                       |                     |             |                | Alive  | Hyperdiploidy > 50  |
| ALL5058    | DFCI 05-001        | 4.6  | M   | B-cell | 2.6      | CNS 1     | SR           | SR         | No      |                       |                     |             |                | Alive  | 9p deletion         |
| ALL5067    | DFCI 05-001        | 9.5  | M   | B-cell | 9.5      | CNS 1     | SR           | VHR        | No      |                       |                     |             |                | Alive  | t(4;14)             |
| ALL5091    | DFCI 05-001        | 10.0 | M   | B-cell | 44       | Traumatic | HR           | HR         | No      |                       |                     |             |                | Alive  | dic(9;12)           |
| ALL5093    | DFCI 05-001        | 6.1  | F   | B-cell | 5.7      | CNS 1     | SR           | VHR        | Yes     | 2.4                   | Yes                 |             |                | Dead   | iAMP21              |
| ALL5094    | DFCI 05-001        | 7.3  | F   | B-cell | 1.7      | CNS 1     | SR           | SR         | No      |                       |                     |             |                | Alive  | Hyperdiploidy > 50  |
| ALL5095    | DFCI 05-001        | 2.6  | M   | B-cell | 120      | CNS 1     | HR           | HR         | No      |                       |                     |             |                | Alive  | Hyperdiploidy > 50  |
| ALL5096    | DFCI 05-001        | 11.8 | F   | B-cell | 30       | CNS 1     | HR           | HR         | No      |                       |                     |             |                | Alive  | ETV6-RUNX1          |
| ALL5099    | DFCI 05-001        | 17.0 | F   | B-cell | 43.6     | CNS 1     | HR           | HR         | Yes     | 2.9                   | Yes                 |             |                | Dead   | t(3;16)             |
| ALL5100    | DFCI 05-001        | 8.3  | F   | B-cell | 6.8      | CNS 1     | SR           | SR         | No      |                       |                     |             |                | Alive  | ETV6-RUNX1          |
| ALL5101    | DFCI 05-001        | 16.1 | M   | B-cell | 1.3      | CNS 1     | HR           | HR         | No      |                       |                     |             |                | Alive  | Hyperdiploidy > 50  |
| ALL5103    | DFCI 05-001        | 2.7  | M   | B-cell | 22.1     | CNS 1     | SR           | SR         | No      |                       |                     |             |                | Alive  | non-informative     |
| ALL5104    | DFCI 05-001        | 3.9  | M   | B-cell | 5.6      | CNS 1     | SR           | SR         | No      |                       |                     |             |                | Alive  | ETV6-RUNX1          |
| ALL5113    | DFCI 05-001        | 5.6  | M   | T-cell | 20.8     | CNS 1     | HR           | HR         | No      |                       |                     |             |                | Alive  | near tetraploidy    |
| ALL5114    | DFCI 05-001        | 13.9 | M   | B-cell | 14.7     | CNS 1     | HR           | HR         | No      |                       |                     |             |                | Alive  | non-informative     |
| ALL5115    | DFCI 05-001        | 2.8  | F   | B-cell | 17.2     | CNS 2     | SR           | VHR        | No      |                       |                     |             |                | Alive  | non-informative     |
| ALL5116    | DFCI 05-001        | 3.5  | M   | B-cell | 9.1      | CNS 1     | SR           | SR         | No      |                       |                     |             |                | Alive  | Hyperdiploidy > 50  |
| ALL5117    | DFCI 05-001        | 1.4  | F   | B-cell | 23.4     | CNS 1     | SR           | SR         | No      |                       |                     |             |                | Alive  | Hyperdiploidy > 50  |
| ALL5120    | DFCI 05-001        | 8.5  | M   | B-cell | 14.6     | Traumatic | HR           | HR         | Yes     | 4.0                   | Yes                 | Yes         |                | Alive  | Hyperdiploidy > 50  |
| ALL5121    | DFCI 05-001        | 3.2  | F   | B-cell | 2.9      | Traumatic | SR           | SR         | No      |                       |                     |             |                | Alive  | Hyperdiploidy > 50  |
| ALL5125    | DFCI 05-001        | 7.2  | F   | B-cell | 2.4      | CNS 1     | SR           | SR         | No      |                       |                     |             |                | Alive  | Hyperdiploidy > 50  |
| ALL5128    | DFCI 05-001        | 4.0  | M   | B-cell | 3        | CNS 1     | SR           | SR         | Yes     | 2.6                   | Yes                 |             |                | Alive  | Hyperdiploidy > 50  |
| ALL5133    | DFCI 05-001        | 10.4 | F   | B-cell | 3.3      | CNS 1     | HR           | HR         | No      |                       |                     |             |                | Alive  | trisomy 9           |
| ALL5134    | DFCI 05-001        | 6.2  | F   | B-cell | 3.1      | CNS 1     | SR           | SR         | No      |                       |                     |             |                | Alive  | Hyperdiploidy > 50  |
| ALL5140    | DFCI 05-001        | 2.4  | M   | B-cell | 29.8     | CNS 2     | SR           | SR         | No      |                       |                     |             |                | Alive  | Hyperdiploidy > 50  |
| ALL5143    | DFCI 05-001        | 1.1  | F   | B-cell | 3        | Traumatic | SR           | SR         | No      |                       |                     |             |                | Alive  | non-informative     |
| ALL5154    | DFCI 05-001        | 8.5  | F   | B-cell | 8.1      | CNS 1     | SR           | VHR        | Yes     | 3.2                   | Yes                 |             |                | Dead   | non-informative     |
| ALL5159    | DFCI 05-001        | 1.5  | M   | B-cell | 89       | Traumatic | HR           | HR         | Yes     | 2.7                   | Yes                 |             | Yes            | Alive  | 12p deletion        |
| ALL5186    | DFCI 05-001        | 2.5  | M   | B-cell | 8.5      | CNS 1     | SR           | VHR        | Yes     | 2.8                   | Yes                 |             |                | Dead   | non-informative     |
| ALL5188    | DFCI 05-001        | 15.0 | M   | B-cell | 130      | CNS 1     | HR           | VHR        | Yes     | 3.8                   | Yes                 | Yes         |                | Alive  | pseudodiploid       |
| ALL5201    | DFCI 05-001        | 5.2  | F   | B-cell | 5.3      | CNS 2     | SR           | SR         | Yes     | 3.9                   | Yes                 |             |                | Alive  | iAMP21              |

**Patient Information (Hybrid Capture)**

| Patient ID | Treatment Protocol | Age  | Sex | immuno | WBC @ dx | CNS @ Dx | initial risk | final risk | relapse | Time to Relapse (yrs) | Bone Marrow Relapse | CNS Relapse | Testis Relapse | status | Primary abnormality   |
|------------|--------------------|------|-----|--------|----------|----------|--------------|------------|---------|-----------------------|---------------------|-------------|----------------|--------|-----------------------|
| ALL5226    | DFCI 05-001        | 11.7 | M   | B-cell | 3.2      | CNS 1    | HR           | HR         | Yes     | 2.9                   | Yes                 |             |                | Alive  | Hyperdiploidy > 50    |
| ALL5277    | DFCI 05-001        | 1.9  | F   | B-cell | 87.8     | CNS 1    | HR           | VHR        | Yes     | 3.5                   | Yes                 |             |                | Alive  | non-informative       |
| ALL5300    | DFCI 05-001        | 17.9 | M   | B-cell | 257      | CNS 2    | HR           | HR         | Yes     | 2.5                   | Yes                 |             |                | Alive  | Hyperdiploidy (47_50) |
| ALL5316    | DFCI 05-001        | 8.2  | M   | B-cell | 3.3      | CNS 1    | SR           | SR         | Yes     | 0.6                   | Yes                 |             |                | Dead   | 9p deletion           |
| ALL5322    | DFCI 05-001        | 4.6  | M   | B-cell | 59.2     | CNS 1    | HR           | HR         | Yes     | 3.0                   | Yes                 |             |                | Alive  | Hyperdiploidy > 50    |
| ALL5380    | DFCI 05-001        | 3.2  | M   | B-cell | 29.7     | CNS 1    | SR           | VHR        | Yes     | 2.0                   | Yes                 | Yes         |                | Dead   | Hypodiploidy < 45     |
| ALL5382    | DFCI 05-001        | 2.3  | F   | B-cell | 59.3     | CNS 1    | HR           | VHR        | Yes     | 0.4                   | Yes                 |             |                | Dead   | MLL rearrangement     |
| ALL5447    | DFCI 05-001        | 4.1  | F   | B-cell | 41.1     | CNS 1    | SR           | VHR        | Yes     | 2.2                   | Yes                 |             |                | Dead   | Hyperdiploidy > 50    |
| ALL5537    | DFCI 05-001        | 11.6 | F   | B-cell | 363.8    | CNS 1    | HR           | HR         | Yes     | 1.3                   | Yes                 | Yes         |                | Dead   | 9p deletion           |
| ALL6001    | AIEOP-R2006        | 6.6  | M   | B-cell | 158.0    | Positive | HR           | HR2*       | Yes     | 1.7                   | Yes                 |             |                | Dead   | MLL rearrangement     |
| ALL6002    | AIEOP-2000         | 6.3  | F   | B-cell | 2.4      | Negative | MR           | MR2        | Yes     | 3.8                   |                     | Yes         |                | Alive  | non-informative       |
| ALL6003    | AIEOP-R2006        | 16.0 | F   | B-cell | 263.0    | Negative | HR           | HR2        | Yes     | 0.6                   | Yes                 |             |                | Dead   | MLL rearrangement     |
| ALL6004    | AIEOP-2000         | 15.1 | F   | B-cell | 10.9     | Negative | MR           | MR2        | Yes     | 1.3                   | Yes                 |             |                | Alive  | t(1;12)(q21;p13)      |
| ALL6005    | AIEOP-2000         | 3.8  | M   | B-cell | 30.2     | Negative | MR           | HR2        | Yes     | 1.8                   | Yes                 |             |                | Dead   | non-informative       |
| ALL6007    | AIEOP-R2006        | 7.5  | F   | B-cell | 7.9      | Negative | MR           | MR2        | Yes     | 3.0                   | Yes                 |             |                | Alive  | non-informative       |
| ALL6008    | AIEOP-2000         | 3.0  | M   | B-cell | 106.0    | Negative | HR           | HR         | Yes     | 0.3                   | Yes                 |             |                | Dead   | BCR-ABL               |
| ALL6010    | AIEOP-R2006        | 3.8  | F   | B-cell | 12.5     | Negative | HR           | HR         | Yes     | 0.4                   | Yes                 |             |                | Dead   | non-informative       |
| ALL6011    | AIEOP-2000         | 12.3 | M   | B-cell | 37.5     | Negative | MR           | MR1        | Yes     | 3.6                   | Yes                 | Yes         |                | Dead   | non-informative       |
| ALL6012    | AIEOP-2000         | 12.6 | F   | B-cell | 27.8     | Negative | HR           | HR2        | Yes     | 2.3                   | Yes                 |             |                | Dead   | non-informative       |
| ALL6013    | AIEOP-R2006        | 10.0 | M   | B-cell | 2.5      | Negative | MR           | MR1        | Yes     | 3.3                   | Yes                 |             |                | Alive  | non-informative       |
| ALL6014    | AIEOP-R2006        | 1.4  | M   | B-cell | 25.3     | Negative | HR           | HR2        | Yes     | 1.0                   | Yes                 |             |                | Alive  | non-informative       |
| ALL6015    | AIEOP-2000         | 1.4  | M   | B-cell | 72.7     | Negative | MR           | MR1        | Yes     | 1.3                   | Yes                 |             |                | Dead   | t(1;19)               |
| ALL6016    | INTERFANT99        | 0.3  | F   | B-cell | 121.0    | Negative | HR           | HR         | Yes     | 2.3                   | Yes                 | Yes         |                | Alive  | non-informative       |

## Patient Information (Amplicon sequencing)

| Patient ID | Treatment Protocol | Age  | Sex | immuno | WBC @ dx | CNS @ Dx | initial risk | final risk | relapse | Time to Relapse (yrs) | Bone Marrow Relapse | CNS Relapse | Testis Relapse | status | Primary abnormality |
|------------|--------------------|------|-----|--------|----------|----------|--------------|------------|---------|-----------------------|---------------------|-------------|----------------|--------|---------------------|
| ALL0007001 | DFCI 00-001        | 13.1 | M   | B cell | 556.5    | CNS 1    | HR           | HR         | No      |                       |                     |             |                | Dead   | BCR-ABL             |
| ALL0008002 | DFCI 00-001        | 1.9  | F   | B cell | 6.2      | CNS 2    | SR           | SR         | No      |                       |                     |             |                | Alive  | Hyperdiploidy > 50  |
| ALL0011003 | DFCI 00-001        | 1.9  | F   | B cell | 7.7      | CNS 1    | SR           | SR         | No      |                       |                     |             |                | Alive  | Hyperdiploidy > 50  |
| ALL0017004 | DFCI 00-001        | 3.3  | F   | B cell | 4.7      | CNS 1    | SR           | SR         | No      |                       |                     |             |                | Alive  | Hyperdiploidy > 50  |
| ALL0018005 | DFCI 00-001        | 10.4 | M   | T cell | 36.8     | CNS 1    | HR           | HR         | No      |                       |                     |             |                | Alive  | MLL rearrangement   |
| ALL0021006 | DFCI 00-001        | 15.7 | M   | B cell | 216      | CNS 1    | HR           | HR         | Yes     | 0.3                   | Yes                 | No          | No             | Dead   | non-informative     |
| ALL0022007 | DFCI 00-001        | 14.1 | M   | B cell | 4.1      | CNS 1    | HR           | HR         | No      |                       |                     |             |                | Alive  | Hyperdiploidy > 50  |
| ALL0023008 | DFCI 00-001        | 5.6  | F   | B cell | 9.1      | CNS 1    | SR           | SR         | No      |                       |                     |             |                | Alive  | Hyperdiploidy       |
| ALL0025009 | DFCI 00-001        | 2.2  | M   | B cell | 9.8      | CNS 2    | SR           | SR         | No      |                       |                     |             |                | Alive  | ETV6-RUNX1          |
| ALL0031010 | DFCI 00-001        | 4.0  | F   | B cell | 228.9    | CNS 2    | HR           | HR         | No      |                       |                     |             |                | Alive  | non-informative     |
| ALL0032011 | DFCI 00-001        | 9.4  | F   | B cell | 4.4      | CNS 2    | SR           | SR         | No      |                       |                     |             |                | Alive  | Hyperdiploidy > 50  |
| ALL0033012 | DFCI 00-001        | 14.6 | F   | B cell | 22.4     | CNS 1    | HR           | HR         | No      |                       |                     |             |                | Alive  | Hyperdiploidy       |
| ALL0036013 | DFCI 00-001        | 3.3  | F   | B cell | 11.5     | CNS 2    | SR           | SR         | Yes     | 2.4                   | Yes                 | No          | No             | Dead   | MLL rearrangement   |
| ALL0038014 | DFCI 00-001        | 14.8 | F   | B cell | 2.4      | CNS 1    | HR           | HR         | No      |                       |                     |             |                | Alive  | iAMP21              |
| ALL0045015 | DFCI 00-001        | 4.6  | F   | T cell | 20.6     | CNS 1    | HR           | HR         | No      |                       |                     |             |                | Dead   | non-informative     |
| ALL0053016 | DFCI 00-001        | 1.8  | M   | B cell | 23.7     | CNS 1    | SR           | SR         | No      |                       |                     |             |                | Alive  | ETV6-RUNX1          |
| ALL0054017 | DFCI 00-001        | 4.2  | M   | B cell | 4.2      | CNS 1    | SR           | SR         | No      |                       |                     |             |                | Dead   | non-informative     |
| ALL0055018 | DFCI 00-001        | 14.0 | F   | B cell | 2.3      | CNS 1    | HR           | HR         | No      |                       |                     |             |                | Alive  | Hyperdiploidy > 50  |
| ALL0057019 | DFCI 00-001        | 15.6 | F   | B cell | 20.7     | CNS 1    | HR           | HR         | Yes     | 0.5                   | Yes                 | No          | No             | Dead   | t(17;19)            |
| ALL0059020 | DFCI 00-001        | 5.3  | F   | B cell | 23.5     | N/A      | SR           | SR         | No      |                       |                     |             |                | Alive  | non-informative     |
| ALL0060021 | DFCI 00-001        | 10.4 | F   | B cell | 5        | CNS 1    | HR           | HR         | No      |                       |                     |             |                | Alive  | add 21(q22)         |
| ALL0061022 | DFCI 00-001        | 2.6  | F   | B cell | 14.4     | CNS 1    | SR           | SR         | No      |                       |                     |             |                | Alive  | ETV6-RUNX1          |
| ALL0066023 | DFCI 00-001        | 7.9  | M   | T cell | 98.6     | CNS 1    | HR           | HR         | Yes     | 3.6                   | Yes                 | No          | No             | Alive  | non-informative     |
| ALL0067024 | DFCI 00-001        | 3.5  | M   | B cell | 9.1      | CNS 1    | SR           | SR         | No      |                       |                     |             |                | Alive  | non-informative     |
| ALL0070025 | DFCI 00-001        | 14.4 | M   | B cell | 137.5    | CNS 2    | HR           | HR         | No      |                       |                     |             |                | Alive  | t(1;19)             |
| ALL0071026 | DFCI 00-001        | 12.8 | M   | B cell | 194.1    | CNS 1    | HR           | HR         | Yes     | 2.5                   | Yes                 | No          | No             | Alive  | ABL x 3 copies      |
| ALL0073027 | DFCI 00-001        | 4.8  | M   | B cell | 127      | CNS 2    | HR           | HR         | No      |                       |                     |             |                | Alive  | ETV6-RUNX1          |
| ALL0074028 | DFCI 00-001        | 14.9 | F   | B cell | 108      | CNS 1    | HR           | HR         | Yes     | 2.5                   | Yes                 | Yes         | No             | Alive  | del 20(q13.1q13.3)  |
| ALL0078029 | DFCI 00-001        | 6.2  | M   | B cell | 4.6      | CNS 1    | SR           | SR         | No      |                       |                     |             |                | Alive  | near triploidy      |
| ALL0081030 | DFCI 00-001        | 3.8  | M   | B cell | 15.2     | CNS 2    | SR           | SR         | No      |                       |                     |             |                | Alive  | t(1;19)             |
| ALL0082031 | DFCI 00-001        | 10.0 | F   | B cell | 3        | CNS 1    | HR           | HR         | Yes     | 4.6                   | No                  | No          | No             | Dead   | non-informative     |
| ALL0083032 | DFCI 00-001        | 3.9  | M   | B cell | 12.2     | CNS 1    | SR           | SR         | No      |                       |                     |             |                | Alive  | non-informative     |
| ALL0086033 | DFCI 00-001        | 2.4  | M   | B cell | 6.2      | CNS 1    | SR           | SR         | No      |                       |                     |             |                | Alive  | Hyperdiploidy > 50  |
| ALL0087034 | DFCI 00-001        | 1.6  | M   | B cell | 74.7     | CNS 1    | HR           | HR         | No      |                       |                     |             |                | Alive  | Hyperdiploidy < 50  |
| ALL0091035 | DFCI 00-001        | 3.7  | M   | B cell | 13.6     | CNS 1    | SR           | SR         | No      |                       |                     |             |                | Alive  | Hyperdiploidy > 50  |
| ALL0095036 | DFCI 00-001        | 4.2  | F   | B cell | 19.3     | CNS 1    | SR           | SR         | No      |                       |                     |             |                | Alive  | t(1;19)             |
| ALL0096037 | DFCI 00-001        | 2.4  | F   | B cell | 18.3     | CNS 1    | SR           | SR         | No      |                       |                     |             |                | Alive  | ETV6-RUNX1          |
| ALL0097038 | DFCI 00-001        | 9.2  | M   | B cell | 2.3      | CNS 1    | SR           | SR         | No      |                       |                     |             |                | Alive  | non-informative     |

**Patient Information (Amplicon sequencing)**

| Patient ID | Treatment Protocol | Age           | Sex | immuno | WBC @ dx | CNS @ Dx | initial risk | final risk | relapse | Time to Relapse (yrs) | Bone Marrow Relapse | CNS Relapse | Testis Relapse | status | Primary abnormality |  |
|------------|--------------------|---------------|-----|--------|----------|----------|--------------|------------|---------|-----------------------|---------------------|-------------|----------------|--------|---------------------|--|
| ALL0100039 | DFCI 00-001        | 1.9           | M   | B cell | 44.2     | CNS 1    | SR           | SR         | Yes     | 3.8                   | No                  | Yes         | No             | Alive  | ETV6-RUNX1          |  |
| ALL0101040 | DFCI 00-001        | 6.1           | M   | B cell | 3.5      | CNS 2    | SR           | SR         | Yes     | 2.6                   | Yes                 | Yes         | No             | Dead   | iAMP21              |  |
| ALL0102041 | DFCI 00-001        | 8.7           | F   | B cell | 16.6     | CNS 1    | SR           | SR         | No      |                       |                     |             |                | Alive  | t(1;19)             |  |
| ALL0103042 | DFCI 00-001        | 1.8           | M   | B cell | 4.8      | CNS 1    | SR           | SR         | No      |                       |                     |             |                | Alive  | Hyperdiploidy > 50  |  |
| ALL0104043 | DFCI 00-001        | 6.8           | M   | B cell | 29.6     | CNS 1    | SR           | SR         | Yes     | 3.5                   | No                  | Yes         | No             | Alive  | MLL rearrangement   |  |
| ALL0106044 | DFCI 00-001        | 12.0          | M   | B cell | 9.4      | CNS 1    | HR           | HR         | No      |                       |                     |             |                | Alive  | non-informative     |  |
| ALL0109045 | DFCI 00-001        | 2.7           | M   | B cell | 32.5     | CNS 2    | SR           | SR         | No      |                       |                     |             |                | Alive  | non-informative     |  |
| ALL0111046 | DFCI 00-001        | 6.7           | F   | B cell | 4.5      | CNS 1    | SR           | SR         | No      |                       |                     |             |                | Alive  | Hyperdiploidy > 50  |  |
| ALL0113047 | DFCI 00-001        | 5.2           | F   | B cell | 23.7     | CNS 1    | SR           | SR         | No      |                       |                     |             |                | Alive  | ETV6-RUNX1          |  |
| ALL0114048 | DFCI 00-001        | 1.5           | F   | B cell | 50.1     | CNS 1    | HR           | HR         | No      |                       |                     |             |                | Alive  | non-informative     |  |
| ALL0115049 | DFCI 00-001        | 3.3           | F   | B cell | 57.3     | CNS 1    | HR           | HR         | Yes     | 3.3                   | Yes                 | No          | No             | Dead   | Hyperdiploidy > 50  |  |
| ALL0130050 | DFCI 00-001        | 5.4           | M   | T cell | 15.9     | CNS 1    | HR           | HR         | Yes     | 0.9                   | Yes                 | No          | No             | Dead   | Hyperdiploidy < 50  |  |
| ALL0141051 | DFCI 00-001        | 6.4           | M   | B cell | 27.5     | CNS 1    | SR           | SR         | Yes     | 2.9                   | Yes                 | Yes         | No             | Alive  | iAMP21              |  |
| ALL0153052 | DFCI 00-001        | 2.0           | M   | B cell | 12.7     | CNS 1    | SR           | SR         | Yes     | 2.3                   | Yes                 | No          | No             | Alive  | Hyperdiploidy > 50  |  |
| ALL0161053 | DFCI 00-001        | 7.4           | F   | B cell | 18.6     | CNS 1    | SR           | SR         | Yes     | 3.3                   | Yes                 | No          | No             | Alive  | Hyperdiploidy < 50  |  |
| ALL0166054 | DFCI 00-001        | 1.8           | M   | B cell | 13.3     | CNS 1    | SR           | SR         | Yes     | 5.3                   | Yes                 | No          | No             | Dead   | Hyperdiploidy > 50  |  |
| ALL0171055 | DFCI 00-001        | 4.4           | F   | B cell | 3.4      | CNS 1    | SR           | SR         | Yes     | 5.1                   | Yes                 | Yes         | No             | Alive  | Hyperdiploidy       |  |
| ALL0176056 | DFCI 00-001        | 6.4           | M   | B cell | 320.7    | CNS 1    | HR           | HR         | Yes     | 1.5                   | Yes                 | No          | No             | Alive  | BCR-ABL             |  |
| ALL0179057 | DFCI 00-001        | 13.7          | M   | B cell | 1.2      | CNS 1    | HR           | HR         | Yes     | 1.5                   | Yes                 | Yes         | No             | Dead   | non-informative     |  |
| ALL0181058 | DFCI 00-001        | 3.3           | F   | B cell | 85.6     | CNS 1    | HR           | HR         | No      |                       |                     |             |                | Alive  | t(1;19)             |  |
| ALL0182059 | DFCI 00-001        | Not available |     |        |          |          |              |            |         |                       |                     |             |                |        |                     |  |
| ALL0183060 | DFCI 00-001        | 2.4           | F   | B cell | 12.5     | CNS 1    | SR           | SR         | No      |                       |                     |             |                | Alive  | Hyperdiploidy > 50  |  |
| ALL0185061 | DFCI 00-001        | 11.7          | F   | B cell | 5.2      | CNS 1    | HR           | HR         | No      |                       |                     |             |                | Alive  | non-informative     |  |
| ALL0186062 | DFCI 00-001        | 3.4           | M   | B cell | 140.3    | CNS 1    | HR           | HR         | Yes     | 2.7                   | No                  | Yes         | No             | Alive  | ETV6-RUNX1          |  |
| ALL0187063 | DFCI 00-001        | 9.6           | F   | B cell | 3        | CNS 1    | SR           | SR         | No      |                       |                     |             |                | Alive  | Hyperdiploidy > 50  |  |
| ALL0190064 | DFCI 00-001        | 7.0           | F   | B cell | 2.6      | CNS 1    | SR           | SR         | No      |                       |                     |             |                | Alive  | Hyperdiploidy > 50  |  |
| ALL0192065 | DFCI 00-001        | 2.9           | M   | B cell | 5.8      | CNS 1    | SR           | SR         | No      |                       |                     |             |                | Alive  | Hyperdiploidy > 50  |  |
| ALL0193066 | DFCI 00-001        | 1.4           | F   | B cell | 10.3     | CNS 1    | SR           | SR         | No      |                       |                     |             |                | Alive  | non-informative     |  |
| ALL0195067 | DFCI 00-001        | 14.2          | M   | B cell | 2        | CNS 1    | HR           | HR         | No      |                       |                     |             |                | Alive  | non-informative     |  |
| ALL0196068 | DFCI 00-001        | 1.3           | F   | B cell | 92.9     | CNS 1    | HR           | HR         | Yes     | 3.5                   | Yes                 | No          | No             | Alive  | MLL rearrangement   |  |
| ALL0197069 | DFCI 00-001        | 2.7           | M   | B cell | 4        | CNS 1    | SR           | SR         | No      |                       |                     |             |                | Alive  | Hyperdiploidy > 50  |  |
| ALL0199070 | DFCI 00-001        | 2.3           | M   | B cell | 2.5      | CNS 1    | SR           | SR         | No      |                       |                     |             |                | Alive  | ETV6-RUNX1          |  |
| ALL0200071 | DFCI 00-001        | 2.7           | F   | B cell | 99.1     | CNS 1    | HR           | HR         | No      |                       |                     |             |                | Alive  | non-informative     |  |
| ALL0210072 | DFCI 00-001        | 8.5           | M   | B cell | 14.8     | CNS 1    | SR           | SR         | Yes     | 5.4                   | Yes                 | No          | No             | Alive  | 12p rearrangement   |  |
| ALL0215073 | DFCI 00-001        | 1.0           | M   | B cell | 31.7     | CNS 1    | SR           | SR         | No      |                       |                     |             |                | Alive  | non-informative     |  |
| ALL0217074 | DFCI 00-001        | 7.9           | M   | B cell | 21.2     | CNS 1    | SR           | SR         | Yes     | 3.9                   | Yes                 | No          | Yes            | Alive  | near tetraploidy    |  |
| ALL0221075 | DFCI 00-001        | 3.8           | F   | B cell | 20.3     | CNS 1    | SR           | SR         | No      |                       |                     |             |                | Alive  | ETV6-RUNX1          |  |
| ALL0222076 | DFCI 00-001        | 4.3           | M   | B cell | 125.9    | CNS 1    | HR           | HR         | No      |                       |                     |             |                | Alive  | ETV6-RUNX1          |  |

**Patient Information (Amplicon sequencing)**

| Patient ID | Treatment Protocol | Age  | Sex | immuno | WBC @ dx | CNS @ Dx  | initial risk | final risk | relapse | Time to Relapse (yrs) | Bone Marrow Relapse | CNS Relapse | Testis Relapse | status | Primary abnormality |
|------------|--------------------|------|-----|--------|----------|-----------|--------------|------------|---------|-----------------------|---------------------|-------------|----------------|--------|---------------------|
| ALL0225077 | DFCI 00-001        | 11.6 | M   | B cell | 2        | CNS 1     | HR           | HR         | No      |                       |                     |             |                | Alive  | Hyperdiploidy > 50  |
| ALL0226078 | DFCI 00-001        | 4.7  | F   | B cell | 6.6      | CNS 1     | SR           | SR         | No      |                       |                     |             |                | Alive  | non-informative     |
| ALL0227079 | DFCI 00-001        | 8.8  | F   | B cell | 6.3      | CNS 1     | SR           | HR         | Yes     | 5.6                   | Yes                 | No          | No             | Alive  | BCR-ABL             |
| ALL0228080 | DFCI 00-001        | 3.9  | F   | B cell | 6.6      | CNS 1     | SR           | SR         | No      |                       |                     |             |                | Alive  | ETV6-RUNX1          |
| ALL0229081 | DFCI 00-001        | 14.6 | F   | B cell | 54       | CNS 1     | HR           | HR         | No      |                       |                     |             |                | Alive  | 7p deletion         |
| ALL0231082 | DFCI 00-001        | 6.7  | M   | B cell | 3.9      | CNS 1     | SR           | SR         | No      |                       |                     |             |                | Alive  | Hyperdiploidy > 50  |
| ALL0234083 | DFCI 00-001        | 4.4  | M   | B cell | 5        | CNS 1     | SR           | SR         | No      |                       |                     |             |                | Alive  | non-informative     |
| ALL0235084 | DFCI 00-001        | 4.5  | M   | B cell | 4.1      | CNS 1     | SR           | SR         | Yes     | 1.5                   | Yes                 | No          | No             | Dead   | non-informative     |
| ALL0236085 | DFCI 00-001        | 4.3  | F   | B cell | 10.6     | CNS 1     | SR           | SR         | No      |                       |                     |             |                | Alive  | Hyperdiploidy < 50  |
| ALL0237086 | DFCI 00-001        | 4.0  | F   | B cell | 86.1     | CNS 2     | HR           | HR         | No      |                       |                     |             |                | Alive  | ETV6-RUNX1          |
| ALL0242087 | DFCI 00-001        | 4.3  | F   | B cell | 48.8     | CNS 1     | SR           | SR         | No      |                       |                     |             |                | Alive  | ETV6-RUNX1          |
| ALL0244088 | DFCI 00-001        | 5.4  | M   | B cell | 5.1      | CNS 1     | SR           | SR         | Yes     | 3.4                   | Yes                 | Yes         | No             | Alive  | ETV6-RUNX1          |
| ALL0249089 | DFCI 00-001        | 4.8  | F   | B cell | 3.7      | CNS 1     | SR           | SR         | No      |                       |                     |             |                | Alive  | ETV6-RUNX1          |
| ALL0255090 | DFCI 00-001        | 13.3 | F   | B cell | 12.1     | CNS 1     | HR           | HR         | No      |                       |                     |             |                | Alive  | 9p abnormality      |
| ALL0262091 | DFCI 00-001        | 12.6 | M   | Other  | 592      | CNS 1     | HR           | HR         | No      |                       |                     |             |                | Alive  | non-informative     |
| ALL0266092 | DFCI 00-001        | 12.8 | F   | B cell | 11.4     | CNS 1     | HR           | HR         | No      |                       |                     |             |                | Alive  | non-informative     |
| ALL0267093 | DFCI 00-001        | 12.9 | M   | B cell | 48.8     | CNS 1     | HR           | HR         | Yes     | 2.9                   | Yes                 | No          | No             | Alive  | Trisomy 5           |
| ALL0269094 | DFCI 00-001        | 1.8  | F   | B cell | 72       | CNS 1     | HR           | HR         | No      |                       |                     |             |                | Alive  | 9p abnormality      |
| ALL0273095 | DFCI 00-001        | 4.7  | F   | B cell | 34.8     | CNS 1     | SR           | SR         | No      |                       |                     |             |                | Alive  | non-informative     |
| ALL0284096 | DFCI 00-001        | 15.2 | M   | B cell | 4.5      | CNS 1     | HR           | HR         | Yes     | 0.9                   | Yes                 | No          | No             | Dead   | non-informative     |
| ALL0287097 | DFCI 00-001        | 17.5 | M   | B cell | 138.3    | CNS 1     | HR           | HR         | No      |                       |                     |             |                | Alive  | BCR-ABL             |
| ALL0288098 | DFCI 00-001        | 5.9  | F   | B cell | 18.9     | CNS 1     | SR           | SR         | No      |                       |                     |             |                | Alive  | t(1;19)             |
| ALL0290099 | DFCI 00-001        | 6.6  | M   | B cell | 2.7      | CNS 1     | SR           | SR         | Yes     | 3.2                   | Yes                 | Yes         | No             | Alive  | Hyperdiploidy > 50  |
| ALL0291100 | DFCI 00-001        | 3.9  | M   | B cell | 81.5     | CNS 3     | HR           | HR         | No      |                       |                     |             |                | Alive  | t(9;20)             |
| ALL0326101 | DFCI 00-001        | 9.3  | F   | B cell | 5.4      | CNS 1     | SR           | SR         | Yes     | 3.2                   | Yes                 | Yes         | No             | Alive  | iAMP21              |
| ALL0357102 | DFCI 00-001        | 16.3 | M   | B cell | 373      | CNS 1     | HR           | HR         | Yes     | 0.5                   | Yes                 |             | No             | Alive  | MLL rearrangement   |
| ALL0359103 | DFCI 00-001        | 12.0 | F   | B cell | 4.4      | CNS 1     | HR           | HR         | Yes     | 1.5                   | Yes                 | No          | No             | Dead   | t(17;19)            |
| ALL0365104 | DFCI 00-001        | 10.1 | M   | B cell | 2.8      | CNS 1     | HR           | HR         | Yes     | 2.9                   | Yes                 | No          | No             | Alive  | non-informative     |
| ALL0418105 | DFCI 00-001        | 2.6  | M   | B cell | 45.6     | CNS 1     | SR           | SR         | Yes     | 1.8                   | Yes                 | Yes         | No             | Dead   | ETV6-RUNX1          |
| ALL0433106 | DFCI 00-001        | 2.0  | F   | B cell | 7.8      | CNS 2     | SR           | SR         | Yes     | 3.5                   | Yes                 | Yes         | No             | Alive  | Hyperdiploidy > 50  |
| ALL0452107 | DFCI 00-001        | 10.7 | M   | T cell | 156.3    | CNS 1     | HR           | HR         | Yes     | 0.7                   | Yes                 | No          | No             | Dead   | non-informative     |
| ALL0476108 | DFCI 00-001        | 13.5 | M   | B cell | 4.5      | CNS 1     | HR           | HR         | Yes     | 2.7                   | Yes                 | No          | Yes            | Alive  | 12p deletion        |
| ALL5015109 | DFCI 05-001        | 3.7  | M   | B-cell | 726.3    | CNS 2     | HR           | 0          | No      |                       |                     |             |                | Dead   | MLL rearrangement   |
| ALL5116110 | DFCI 05-001        | 3.5  | M   | B-cell | 9.1      | CNS 1     | SR           | SR         | No      |                       |                     |             |                | Alive  | Hyperdiploidy > 50  |
| ALL5117111 | DFCI 05-001        | 1.4  | F   | B-cell | 23.4     | CNS 1     | SR           | SR         | No      |                       |                     |             |                | Alive  | Hyperdiploidy > 50  |
| ALL5121112 | DFCI 05-001        | 3.2  | F   | B-cell | 2.9      | Traumatic | SR           | SR         | No      |                       |                     |             |                | Alive  | Hyperdiploidy > 50  |
| ALL5133113 | DFCI 05-001        | 10.4 | F   | B-cell | 3.3      | CNS 1     | HR           | HR         | No      |                       |                     |             |                | Alive  | trisomy 9           |
| ALL5134114 | DFCI 05-001        | 6.2  | F   | B-cell | 3.1      | CNS 1     | SR           | SR         | No      |                       |                     |             |                | Alive  | Hyperdiploidy > 50  |



**Patient Information (Amplicon sequencing)**

| Patient ID | Treatment Protocol | Age  | Sex | immuno | WBC @ dx | CNS @ Dx  | initial risk | final risk | relapse | Time to Relapse (yrs) | Bone Marrow Relapse | CNS Relapse | Testis Relapse | status | Primary abnormality |
|------------|--------------------|------|-----|--------|----------|-----------|--------------|------------|---------|-----------------------|---------------------|-------------|----------------|--------|---------------------|
| ALL5142115 | DFCI 05-001        | 2.4  | M   | B-cell | 0.8      | CNS 1     | SR           | SR         | No      |                       |                     |             |                | Alive  | Hyperdiploidy > 50  |
| ALL5143116 | DFCI 05-001        | 1.1  | F   | B-cell | 3        | Traumatic | SR           | SR         | No      |                       |                     |             |                | Alive  | non-informative     |
| ALL5150117 | DFCI 05-001        | 5.1  | F   | B-cell | 8.9      | CNS 1     | SR           | SR         | No      |                       |                     |             |                | Alive  | ETV6-RUNX1          |
| ALL5151118 | DFCI 05-001        | 2.9  | M   | B-cell | 23.4     | CNS 1     | SR           | SR         | No      |                       |                     |             |                | Alive  | non-informative     |
| ALL5157119 | DFCI 05-001        | 14.0 | F   | B-cell | 14.3     | CNS 1     | HR           | HR         | No      |                       |                     |             |                | Alive  | non-informative     |
| ALL5161120 | DFCI 05-001        | 3.2  | M   | B-cell | 5.4      | CNS 1     | SR           | SR         | No      |                       |                     |             |                | Alive  | ETV6-RUNX1          |
| ALL5175121 | DFCI 05-001        | 17.2 | F   | B-cell | 14.9     | CNS 3     | HR           | HR         | No      |                       |                     |             |                | Alive  | 9p del              |
| ALL5183122 | DFCI 05-001        | 3.5  | M   | B-cell | 17.6     | CNS 1     | SR           | SR         | No      |                       |                     |             |                | Alive  | Hyperdiploidy > 50  |
| ALL5190123 | DFCI 05-001        | 6.0  | F   | B-cell | 2.3      | CNS 1     | SR           | SR         | No      |                       |                     |             |                | Alive  | ETV6-RUNX1          |
| ALL5195124 | DFCI 05-001        | 15.0 | F   | B-cell | 3.5      | CNS 1     | HR           | HR         | No      |                       |                     |             |                | Alive  | Hyperdiploidy > 50  |
| ALL5210125 | DFCI 05-001        | 2.3  | M   | B-cell | 3.3      | CNS 1     | SR           | SR         | No      |                       |                     |             |                | Alive  | Hyperdiploidy > 50  |

**Supplementary Table 3: Mutations by Genetic Subtype of ALL**

**All Sequencing**

|               | <b>BCR-ABL</b> | <b>MLL</b> | <b>HYPO</b> | <b>iAMP21</b> | <b>ETV6/RUNX1</b> | <b>HYPER</b> | <b>NI</b> | <b>Total</b> |
|---------------|----------------|------------|-------------|---------------|-------------------|--------------|-----------|--------------|
| # Cases       | 5              | 9          | 1           | 6             | 23                | 54           | 87        | 185          |
| % of cohort   | 3%             | 5%         | 1%          | 3%            | 12%               | 29%          | 47%       |              |
| <b>SETD2</b>  | 1 (20%)        | 2 (22%)    |             | 1 (16%)       | 3 (13%)           | 4 (7%)       | 8 (9%)    | 19 (10%)     |
| <b>KRAS</b>   |                | 1 (11%)    |             | 2 (33%)       | 1 (4%)            | 8 (14%)      | 16 (18%)  | 28 (15%)     |
| <b>NRAS</b>   |                | 1 (11%)    | 1 (100%)    |               |                   | 12 (22%)     | 12 (13%)  | 26 (14%)     |
| <b>FLT3</b>   |                | 1 (11%)    |             |               | 1 (4%)            | 7 (12%)      | 2 (2%)    | 11 (5%)      |
| <b>JAK2</b>   |                | 1 (11%)    |             |               |                   | 3 (5%)       | 3 (3%)    | 7 (3%)       |
| <b>TP53</b>   |                | 1 (11%)    |             |               |                   | 1 (1%)       | 7 (8%)    | 9 (4%)       |
| <b>CDKN2A</b> |                |            |             |               | 4 (17%)           |              |           | 4 (2%)       |

**Hybrid Capture Sequencing**

|               | <b>BCR-ABL</b> | <b>MLL</b> | <b>HYPO</b> | <b>iAMP21</b> | <b>ETV6/RUNX1</b> | <b>HYPER</b> | <b>NI</b> | <b>Total</b> |
|---------------|----------------|------------|-------------|---------------|-------------------|--------------|-----------|--------------|
| # Cases       | 1              | 3          | 1           | 2             | 3                 | 17           | 33        | 60           |
| % of cohort   | 2%             | 5%         | 2%          | 3%            | 5%                | 28%          | 55%       |              |
| <b>SETD2</b>  |                |            |             | 1 (50%)       |                   | 1 (5%)       | 2 (6%)    | 4 (6%)       |
| <b>KRAS</b>   |                | 1 (33%)    |             |               |                   | 4 (23%)      | 7 (21%)   | 12 (20%)     |
| <b>NRAS</b>   |                | 1 (33%)    | 1 (100%)    |               |                   | 3 (17%)      | 6 (18%)   | 11 (18%)     |
| <b>FLT3</b>   |                |            |             |               |                   | 3 (17%)      | 1 (3%)    | 4 (6%)       |
| <b>JAK2</b>   |                |            |             |               |                   | 1 (5%)       | 2 (6%)    | 3 (5%)       |
| <b>TP53</b>   |                | 1 (33%)    |             |               |                   |              |           | 1 (1%)       |
| <b>ATF7IP</b> |                |            |             |               |                   |              | 1 (3%)    | 1 (1%)       |
| <b>BPTF</b>   |                | 1 (33%)    |             |               |                   |              |           | 1 (1%)       |
| <b>BRD8</b>   |                | 1 (33%)    |             |               |                   |              |           | 1 (1%)       |
| <b>BRPF1</b>  |                |            |             |               |                   | 1 (5%)       |           | 1 (1%)       |
| <b>CHD1</b>   |                |            |             |               |                   |              | 1 (3%)    | 1 (1%)       |
| <b>CHD7</b>   |                |            |             |               |                   |              | 1 (3%)    | 1 (1%)       |
| <b>CHD9</b>   |                |            |             |               |                   |              | 1 (3%)    | 1 (1%)       |
| <b>CREBBP</b> |                |            |             |               |                   | 5 (29%)      | 3 (9%)    | 8 (13%)      |
| <b>EZH2</b>   |                |            |             |               |                   |              | 1 (3%)    | 1 (1%)       |
| <b>HUWE1</b>  |                |            |             |               |                   | 1 (5%)       |           | 1 (1%)       |
| <b>JHDM1D</b> |                |            |             | 1 (50%)       |                   |              |           | 1 (1%)       |

|        |          |  |  |  |        |        |        |
|--------|----------|--|--|--|--------|--------|--------|
| JMJD1C |          |  |  |  | 1 (5%) |        | 1 (1%) |
| KDM5C  |          |  |  |  | 1 (5%) |        | 1 (1%) |
| KDM6A  |          |  |  |  |        | 2 (6%) | 2 (3%) |
| MLL2   |          |  |  |  |        | 2 (6%) | 2 (3%) |
| MSH6   |          |  |  |  | 1 (5%) | 1 (3%) | 2 (3%) |
| MTA1   |          |  |  |  |        | 1 (3%) | 1 (1%) |
| PHF3   |          |  |  |  |        | 1 (3%) | 1 (1%) |
| SETDB1 |          |  |  |  |        | 1 (3%) | 1 (1%) |
| SRCAP  |          |  |  |  |        | 1 (3%) | 1 (1%) |
| ZNF541 | 1 (33%)  |  |  |  |        |        | 1 (1%) |
| ETV6   |          |  |  |  | 1 (5%) |        | 1 (1%) |
| IKZF1  |          |  |  |  |        | 2 (6%) | 2 (3%) |
| RUNX1  | 1 (100%) |  |  |  |        |        | 1 (1%) |

#### Amplicon NGS Sequencing

|             | BCR-ABL | MLL     | HYPO | iAMP21  | ETV6/RUNX1 | HYPER   | NI      | Total    |
|-------------|---------|---------|------|---------|------------|---------|---------|----------|
| # Cases     | 4       | 6       | 0    | 4       | 20         | 37      | 54      | 125      |
| % of cohort | 3%      | 5%      | 0%   | 3%      | 16%        | 30%     | 43%     |          |
| SETD2       | 1 (25%) | 2 (33%) |      |         | 3 (15%)    | 3 (8%)  | 6 (11%) | 15 (12%) |
| KRAS        |         |         |      | 2 (50%) | 1 (5%)     | 4 (10%) | 9 (16%) | 16 (12%) |
| NRAS        |         |         |      |         |            | 9 (24%) | 6 (11%) | 15 (12%) |
| PTPN11      |         |         |      |         | 1 (5%)     | 3 (8%)  | 3 (5%)  | 7 (5%)   |
| FLT3        |         | 1 (16%) |      |         | 1 (5%)     | 4 (10%) | 1 (1%)  | 7 (5%)   |
| JAK2        |         | 1 (16%) |      |         |            | 2 (5%)  | 1 (1%)  | 4 (3%)   |
| TP53        |         |         |      |         |            | 1 (2%)  | 7 (12%) | 8 (6%)   |
| CDKN2A      |         |         |      |         | 4 (20%)    |         |         | 4 (3%)   |

Mutations found at diagnosis or relapse, broken down by ALL genetic subtype. Subtype, total number of cases for each subtype and the percent of the total cohort is noted in the first three columns. For each gene, the number and percent of mutations for each gene is noted. Percentages are there for comparison purposes; however, for genetic subtypes with small numbers, this may not accurately reflect the frequency found in larger cohorts of patients. MLL: MLL rearranged, HYPO: Hypodiploidy, iAMP21: intrachromosomal amplification of chromosome 21, HYPER: Hyperdiploidy.

**Supplementary Table 4: Somatic mutations**

| patient | chrom | pos_start | ref | var | gene    | cdna             | aa                 | result               | dx AF | dx reads    | rm AF | rm reads | rl AF | r1 reads   |
|---------|-------|-----------|-----|-----|---------|------------------|--------------------|----------------------|-------|-------------|-------|----------|-------|------------|
| ALL5012 | 2     | 48033742  | -   | A   | MSH6    | c.3953_3954insA  | p.R1318fs          | frameshift insertion | 0.45  | 169+138:+A  | 0.00  | 243+0:   |       |            |
| ALL5012 | 1     | 115258748 | C   | A   | NRAS    | c.G34T           | p.G12C             | nonsynonymous SNV    | 0.42  | 216+155:A   | 0.00  | 326+0:   |       |            |
| ALL5028 | 13    | 28602376  | C   | G   | FLT3    | c.G1992C         | p.M664I            | nonsynonymous SNV    | 0.49  | 51+49:G     | 0.00  | 77+0:    |       |            |
| ALL5028 | X     | 53620346  | C   | T   | HUWE1   | c.G3719A         | p.R1240H           | nonsynonymous SNV    | 0.23  | 348+104:T   | 0.00  | 207+0:   |       |            |
| ALL5035 | 7     | 50367290  | -   | T   | IKZF1   | c.97_98insT      | p.I33fs            | frameshift insertion | 0.40  | 135+90:+T   | 0.00  | 93+0:    |       |            |
| ALL5046 | 8     | 61732608  | C   | T   | CHD7    | c.C2656T         | p.R886W            | nonsynonymous SNV    | 0.52  | 60+65:T     | 0.00  | 211+0:   | 0.42  | 76+55:T    |
| ALL5046 | X     | 44929506  | A   | T   | KDM6A   | c.A2606T         | p.D869V            | nonsynonymous SNV    | 0.40  | 204+134:T   | 0.00  | 579+0:   | 0.47  | 323+291:T  |
| ALL5058 | 12    | 25398281  | C   | T   | KRAS    | c.G38A           | p.G13D             | nonsynonymous SNV    | 0.45  | 277+225:T   | 0.01  | 438+3:T  |       |            |
| ALL5067 | 11    | 94759351  | C   | T   | KDM4E   | c.C630T          | p.Y210Y            | synonymous SNV       | 0.30  | 52+22:T     | 0.00  | 767+3:T  |       |            |
| ALL5067 | 1     | 115258748 | C   | A   | NRAS    | c.G34T           | p.G12C             | nonsynonymous SNV    | 0.24  | 65+20:A     | 0.00  | 800+3:A  |       |            |
| ALL5091 | 13    | 28592642  | C   | G   | FLT3    | c.G2503C         | p.D835H            | nonsynonymous SNV    | 0.55  | 407+499:G   | 0.00  | 1776+0:  |       |            |
| ALL5093 | 7     | 139819019 | C   | T   | JHDM1D  | c.1140-1G>A      |                    | splicing             | 0.00  | 355+0:      | 0.00  | 120+0:   | 0.23  | 204+61:T   |
| ALL5095 | 16    | 3786761   | A   | C   | CREBBP  | c.T4450G         | p.F1484V           | nonsynonymous SNV    | 0.62  | 29+48:C     | 0.00  | 572+0:   |       |            |
| ALL5099 | 12    | 25380285  | G   | A   | KRAS    | c.C173T          | p.T58I             | nonsynonymous SNV    | 0.14  | 1707+283:A  | 0.00  | 765+0:   | 0.42  | 414+303:A  |
| ALL5099 | 12    | 49442895  | -   | CC  | MLL2    | c.4013_4014insGG | p.T1338fs          | frameshift insertion | 0.05  | 206+10:+CC  | 0.00  | 89+0:    | 0.38  | 64+40:+CC  |
| ALL5099 | 6     | 64356469  | G   | T   | PHF3    | c.G13T           | p.D5Y              | nonsynonymous SNV    | 0.20  | 1407+342:T  | 0.00  | 816+1:C  | 0.00  | 751+1:A    |
| ALL5099 | 3     |           |     |     | SETD2   | whole gene       |                    | deletion             | 0.50  |             |       |          | 0.50  |            |
| ALL5099 | 3     | 47129621  | -   | AC  | SETD2   | c.5259_5260insGT | p.T1753fs          | frameshift insertion | 0.26  | 815+293:+AC | 0.00  | 1016+2:T | 0.00  | 533+0:     |
| ALL5101 | 16    | 3788617   | C   | T   | CREBBP  | c.G4337A         | p.R1446H           | nonsynonymous SNV    | 0.34  | 475+246:T   | 0.00  | 406+0:   |       |            |
| ALL5101 | 12    | 25380275  | T   | G   | KRAS    | c.A183C          | p.Q61H             | nonsynonymous SNV    | 0.37  | 896+521:G   | 0.00  | 570+1:G  |       |            |
| ALL5113 | 14    | 105936286 | G   | A   | MTA1    | c.G1954A         | p.D652N            | nonsynonymous SNV    | 0.41  | 47+32:A     | 0.00  | 58+0:    |       |            |
| ALL5115 | 1     | 6169913   | C   | T   | CHD5    | c.G5520A         | p.Q1840Q           | synonymous SNV       | 0.37  | 40+23:T     | 0.00  | 59+0:    |       |            |
| ALL5115 | 12    | 25398284  | C   | T   | KRAS    | c.G35A           | p.G12D             | nonsynonymous SNV    | 0.16  | 322+61:T    | 0.00  | 634+0:   |       |            |
| ALL5115 | 1     | 150935161 | G   | A   | SETDB1  | c.G3257A         | p.R1086Q           | nonsynonymous SNV    | 0.23  | 207+61:A    | 0.00  | 464+0:   |       |            |
| ALL5117 | 12    | 25398281  | C   | T   | KRAS    | c.G38A           | p.G13D             | nonsynonymous SNV    | 0.26  | 910+314:T   | 0.00  | 590+0:   |       |            |
| ALL5120 | 2     | 160194152 | T   | C   | BAZ2B   | c.A5586G         | p.L1862L           | synonymous SNV       | 0.18  | 631+143:C   | 0.00  | 444+0:   | 0.00  | 297+0:     |
| ALL5120 | 16    | 3786795   | C   | A   | CREBBP  | c.G4416T         | p.W1472C           | nonsynonymous SNV    | 0.00  | 532+0:      | 0.00  | 180+0:   | 0.30  | 90+39:A    |
| ALL5120 | 1     | 115258748 | C   | A   | NRAS    | c.G34T           | p.G12C             | nonsynonymous SNV    | 0.31  | 659+296:T   | 0.00  | 309+0:   | 0.31  | 122+56:T   |
| ALL5125 | 16    | 3786715   | A   | C   | CREBBP  | c.T4496G         | p.L1499R           | nonsynonymous SNV    | 0.39  | 387+246:C   | 0.00  | 452+0:   |       |            |
| ALL5125 | 1     | 115258748 | C   | A   | NRAS    | c.G34T           | p.G12C             | nonsynonymous SNV    | 0.41  | 505+356:A   | 0.00  | 519+1:G  |       |            |
| ALL5125 | 3     | 47164571  | -   | A   | SETD2   | c.1555_1556insT  | p.K519_R520delinsX | stopgain SNV         | 0.37  | 494+297:+A  | 0.00  | 354+0:   |       |            |
| ALL5128 | 12    | 25398284  | C   | T   | KRAS    | c.G35A           | p.G12D             | nonsynonymous SNV    | 0.06  | 423+27:T    | 0.01  | 364+3:A  | 0.47  | 79+70:T    |
| ALL5134 | 13    | 28592629  | T   | C   | FLT3    | c.A2516G         | p.D839G            | nonsynonymous SNV    | 0.18  | 199+44:C    | 0.00  | 591+0:   |       |            |
| ALL5143 | 12    | 14613656  | C   | T   | ATF7IP  | c.C2386T         | p.Q796X            | stopgain SNV         | 0.16  | 678+128:T   | 0.00  | 800+0:   |       |            |
| ALL5143 | 16    | 3789627   | C   | T   | CREBBP  | c.G4232A         | p.G1411E           | nonsynonymous SNV    | 0.16  | 369+69:T    | 0.00  | 530+0:   |       |            |
| ALL5159 | 9     | 5078362   | A   | T   | JAK2    | c.A2049T         | p.R683S            | nonsynonymous SNV    | 0.00  | 408+2:T     | 0.00  | 873+1:G  | 0.30  | 310+135:T  |
| ALL5174 | 12    | 56558397  | C   | T   | SMARCC2 | c.G3258A         | p.P1086P           | synonymous SNV       | 0.00  | 62+0:       | 0.16  | 21+4:T   | 0.00  | 48+0:      |
| ALL5186 | 1     | 115256530 | G   | T   | NRAS    | c.C181A          | p.Q61K             | nonsynonymous SNV    | 0.01  | 350+2:T     | 0.04  | 295+13:T | 0.27  | 127+48:T   |
| ALL5201 | 3     | 47144908  | -   | A   | SETD2   | c.4845_4846insT  | p.I1615fs          | frameshift insertion | 0.00  | 402+1:G     | 0.00  | 220+0:   | 0.35  | 274+150:+A |
| ALL5226 | 13    | 28592640  | A   | C   | FLT3    | c.T2505G         | p.D835E            | nonsynonymous SNV    | 0.38  | 210+128:C   | 0.00  | 555+1:C  | 0.40  | 189+130:C  |
| ALL5226 | X     | 53222963  | C   | T   | KDM5C   | c.3907+1G>A      |                    | splicing             | 0.34  | 116+60:T    | 0.00  | 121+0:   | 0.45  | 77+65:T    |
| ALL5277 | 5     | 98192283  | G   | C   | CHD1    | c.C4934G         | p.S1645X           | stopgain SNV         | 0.00  | 481+1:T     | 0.00  | 177+0:   | 0.35  | 247+135:C  |
| ALL5277 | 12    | 25378559  | T   | C   | KRAS    | c.A439G          | p.K147E            | nonsynonymous SNV    | 0.00  | 113+0:      | 0.00  | 332+0:   | 0.61  | 69+109:C   |
| ALL5300 | 9     | 5078362   | A   | T   | JAK2    | c.A2049T         | p.R683S            | nonsynonymous SNV    | 0.01  | 992+7:T     | 0.00  | 912+1:G  | 0.48  | 185+168:T  |

|         |    |           |   |     |         |                  |           |                      |      |             |      |          |      |             |
|---------|----|-----------|---|-----|---------|------------------|-----------|----------------------|------|-------------|------|----------|------|-------------|
| ALL5300 | 9  | 5078360   | A | G   | JAK2    | c.A2047G         | p.R683G   | nonsynonymous SNV    | 0.23 | 758+228:G   | 0.00 | 916+0:   | 0.00 | 358+0:      |
| ALL5300 | 12 | 25378562  | C | T   | KRAS    | c.G436A          | p.A146T   | nonsynonymous SNV    | 0.00 | 918+3:T     | 0.00 | 829+1:A  | 0.39 | 268+168:T   |
| ALL5322 | 3  | 9788110   | G | A   | BRPF1   | c.G3433A         | p.V1145I  | nonsynonymous SNV    | 0.01 | 460+5:A     | 0.02 | 142+3:A  | 0.48 | 51+47:A     |
| ALL5322 | 12 | 12006489  | - | A   | ETV6    | c.457_458insA    | p.E153fs  | frameshift insertion | 0.39 | 637+412:+A  | 0.02 | 288+7:+A | 0.35 | 189+105:+A  |
| ALL5322 | 1  | 115256530 | G | T   | NRAS    | c.C181A          | p.Q61K    | nonsynonymous SNV    | 0.26 | 487+167:T   | 0.00 | 211+1:T  | 0.00 | 126+0:      |
| ALL5380 | 1  | 115258747 | C | A   | NRAS    | c.G35T           | p.G12V    | nonsynonymous SNV    | 0.43 | 48+36:A     | 0.00 | 234+0:   | 0.00 | 450+0:      |
| ALL5382 | 12 | 25398284  | C | T   | KRAS    | c.G35A           | p.G12D    | nonsynonymous SNV    | 0.28 | 420+167:T   | 0.00 | 1180+0:  | 0.38 | 130+78:T    |
| ALL5382 | 2  | 231113658 | C | A   | SP140   | c.C951A          | p.L317L   | synonymous SNV       | 0.29 | 190+77:A    | 0.00 | 1019+0:  | 0.44 | 110+88:A    |
| ALL5447 | 16 | 3788641   | - | C   | CREBBP  | c.4313_4314insG  | p.H1438fs | frameshift insertion | 0.00 | 180+0:      | 0.00 | 308+0:   | 0.44 | 52+44:+C    |
| ALL5447 | 16 | 3788643   | - | GG  | CREBBP  | c.4311_4312insCC | p.I1437fs | frameshift insertion | 0.00 | 178+0:      | 0.00 | 318+0:   | 0.44 | 52+45:+GG   |
| ALL5447 | 10 | 64953136  | C | T   | JMJD1C  | c.G5831A         | p.G1944E  | nonsynonymous SNV    | 0.00 | 221+0:      | 0.00 | 669+0:   | 0.50 | 53+52:T     |
| ALL5447 | 2  | 48028049  | G | A   | MSH6    | c.G2927A         | p.R976H   | nonsynonymous SNV    | 0.00 | 402+0:      | 0.00 | 769+0:   | 0.21 | 143+38:A    |
| ALL5537 | 7  | 50367315  | C | A   | IKZF1   | c.C122A          | p.S41X    | stopgain SNV         | 0.50 | 78+79:A     | 0.03 | 32+1:A   | 0.25 | 131+43:A    |
| ALL5537 | 9  | 5089726   | C | A   | JAK2    | c.C2624A         | p.T875N   | nonsynonymous SNV    | 0.29 | 105+43:A    | 0.00 | 51+0:    | 0.21 | 139+38:A    |
| ALL6001 | 17 | 65941578  | G | T   | BPTF    | c.G7132T         | p.D2378Y  | nonsynonymous SNV    | 0.00 | 150+0:      | 0.00 | 196+0:   | 0.37 | 214+124:T   |
| ALL6001 | 17 | 7577539   | G | A   | TP53    | c.C346T          | p.R116W   | nonsynonymous SNV    | 0.00 | 27+0:       | 0.00 | 41+0:    | 0.93 | 1+27:A      |
| ALL6001 | 19 | 48047555  | C | T   | ZNF541  | c.G2231A         | p.R744Q   | nonsynonymous SNV    | 0.00 | 36+0:       | 0.00 | 49+0:    | 0.48 | 47+43:T     |
| ALL6002 | 12 | 49449093  | - | GG  | MLL2    | c.15_16insCC     | p.K5fs    | frameshift insertion | 0.00 | 76+0:       | 0.00 | 133+0:   | 0.37 | 173+106:+GG |
| ALL6002 | 16 | 30723471  | C | T   | SRCAP   | c.C1808T         | p.T603M   | nonsynonymous SNV    | 0.00 | 125+0:      | 0.01 | 180+1:T  | 0.45 | 183+151:T   |
| ALL6003 | 5  | 137507753 | C | A   | BRD8    | c.186+1G>T       |           | splicing             | 0.60 | 14+21:A     | 0.00 | 60+0:    | 0.07 | 50+4:A      |
| ALL6003 | 1  | 115258747 | C | A   | NRAS    | c.G35T           | p.G12V    | nonsynonymous SNV    | 0.20 | 229+57:T    | 0.00 | 390+0:   | 0.00 | 139+0:      |
| ALL6004 | 1  | 27101587  | G | A   | ARID1A  | c.G4218A         | p.S1406S  | synonymous SNV       | 0.00 | 313+0:      | 0.00 | 312+0:   | 0.29 | 238+98:A    |
| ALL6004 | 16 | 53279681  | G | T   | CHD9    | c.G3373T         | p.A1125S  | nonsynonymous SNV    | 0.00 | 439+0:      | 0.00 | 371+0:   | 0.45 | 208+168:T   |
| ALL6004 | 7  | 148526829 | C | T   | EZH2    | c.G475A          | p.G159R   | nonsynonymous SNV    | 0.00 | 515+0:      | 0.01 | 336+4:A  | 0.21 | 228+59:T    |
| ALL6004 | 12 | 25398206  | - | CCT | KRAS    | c.111+2->AGG     |           | splicing             | 0.26 | 269+95:+CCT | 0.00 | 245+0:   | 0.15 | 148+26:+CCT |
| ALL6005 | X  | 44966777  | G | C   | KDM6A   | c.G4001C         | p.C1334S  | nonsynonymous SNV    | 0.00 | 388+0:      | 0.00 | 134+0:   | 0.45 | 204+169:C   |
| ALL6005 | 12 | 56558397  | C | T   | SMARCC2 | c.G3258A         | p.P1086P  | synonymous SNV       | 0.49 | 17+17:T     | -    | -        | 0.63 | 12+20:T     |
| ALL6005 | 6  | 46660002  | C | T   | TDRD6   | c.C4137T         | p.P1379P  | synonymous SNV       | 0.00 | 660+0:      | 0.00 | 303+0:   | 0.28 | 395+150:T   |
| ALL6007 | 16 | 3799627   | C | T   | CREBBP  | c.3722+1G>A      |           | splicing             | 0.26 | 103+37:T    | 0.00 | 106+0:   | 0.43 | 72+55:T     |
| ALL6008 | 21 | 36171729  | C | T   | RUNX1   | c.G755A          | p.W252X   | stopgain SNV         | 0.48 | 229+215:T   | 0.00 | 584+1:T  | 0.42 | 392+280:T   |
| ALL6010 | 12 | 25398284  | C | T   | KRAS    | c.G35A           | p.G12D    | nonsynonymous SNV    | 0.23 | 292+88:G    | 0.01 | 451+3:G  | 0.02 | 163+4:G     |
| ALL6010 | 12 | 25398283  | A | G   | KRAS    | c.T36C           | p.G12G    | synonymous SNV       | 0.24 | 297+92:G    | 0.00 | 455+2:G  | 0.02 | 162+4:G     |
| ALL6011 | 1  | 115256528 | T | G   | NRAS    | c.A183C          | p.Q61H    | nonsynonymous SNV    | 0.42 | 825+606:G   | 0.00 | 960+1:G  | 0.00 | 696+0:      |
| ALL6012 | 1  | 115258747 | C | A   | NRAS    | c.G35T           | p.G12V    | nonsynonymous SNV    | 0.16 | 965+179:T   | 0.00 | 560+0:   | 0.00 | 714+0:      |
| ALL6012 | 3  | 47058642  | T | A   | SETD2   | c.A7636T         | p.K2546X  | stopgain SNV         | 0.92 | 87+1006:A   | 0.00 | 402+1:A  | 0.83 | 147+706:A   |
| ALL6013 | 12 | 25398284  | C | T   | KRAS    | c.G35A           | p.G12D    | nonsynonymous SNV    | 0.18 | 254+59:T    | 0.02 | 112+2:T  | 0.00 | 157+0:      |
| ALL6014 | 16 | 3786740   | G | T   | CREBBP  | c.C4471A         | p.Q1491K  | nonsynonymous SNV    | 0.29 | 1235+499:T  | 0.00 | 472+0:   | 0.22 | 292+81:T    |
| ALL6014 | 1  | 115258747 | C | A   | NRAS    | c.G35T           | p.G12V    | nonsynonymous SNV    | 0.30 | 1236+540:T  | 0.01 | 515+4:T  | 0.12 | 328+46:T    |

Details of somatic mutations described in this study. dx AF, rm AF, rl AF: allele frequency of variant at diagnosis, remission or relapse. dx reads, rm reads, rl reads: reads depth supporting reference and variant: For example, 183+151:T means a total of 332 reads at this position, 183 support the reference base and 151 support the variant base T.

Supplementary Table 5-Amplicon sequencing primers

| Forward Primer       | Primer sequence                                      | Reverse Primer       | Primer sequence                                       |
|----------------------|------------------------------------------------------|----------------------|-------------------------------------------------------|
| CDKN2AEXON1_C_1_48.A | ACACTGACGACATGGTTCTACACGCCCGCACCTCCTCTACCC           | CDKN2AEXON1_C_1_48.B | TACGGTAGCAGAGACTTGGTCTGGCTGGCTGGTCACCAGAGGG           |
| CDKN2AEXON1_C_2_47.A | ACACTGACGACATGGTTCTACAAAACCTCGTCTCCAGAGTCGCC         | CDKN2AEXON1_C_2_47.B | TACGGTAGCAGAGACTTGGTCTCTTCGGCTGACTGGCTGGC             |
| CDKN2AEXON1_W_1_46.A | ACACTGACGACATGGTTCTACAGAGAGCAGGCAGCGGGCGGC           | CDKN2AEXON1_W_1_46.B | TACGGTAGCAGAGACTTGGTCTCTGGATCGGCCTCCGACCGT            |
| CDKN2AEXON1_W_2_45.A | ACACTGACGACATGGTTCTACACTGCTGGAGCGGGGGCGCT            | CDKN2AEXON1_W_2_45.B | TACGGTAGCAGAGACTTGGTCTCCAGGAAGCTCCCTTTTTCCG           |
| CDKN2AEXON2_C_1_44.A | ACACTGACGACATGGTTCTACATCGGGTGAGAGTGGCGGGGT           | CDKN2AEXON2_C_1_44.B | TACGGTAGCAGAGACTTGGTCTTCTGCTTGGCGGTGAGGGGG            |
| CDKN2AEXON2_C_2_43.A | ACACTGACGACATGGTTCTACACTCCTCAGCCAGGTCCACGGG          | CDKN2AEXON2_C_2_43.B | TACGGTAGCAGAGACTTGGTCTGAGCTGCTGCTCACCAG               |
| CDKN2AEXON2_C_3_42.A | ACACTGACGACATGGTTCTACAATTCTCAGATCATCAGTCTCACCTGAGGG  | CDKN2AEXON2_C_3_42.B | TACGGTAGCAGAGACTTGGTCTGGGGCGCGGTGGACGTGCG             |
| CDKN2AEXON2_C_4_41.A | ACACTGACGACATGGTTCTACAACCTCAGCCGCTCCACCGATTG         | CDKN2AEXON2_C_4_41.B | TACGGTAGCAGAGACTTGGTCTAACCTATGCCGCATAGTCCGC           |
| CDKN2AEXON2_W_1_40.A | ACACTGACGACATGGTTCTACATGGCTCTGACCATTTCTGTTCTCTGGC    | CDKN2AEXON2_W_1_40.B | TACGGTAGCAGAGACTTGGTCTGGCCCGGTGCAGCACCA               |
| CDKN2AEXON2_W_2_39.A | ACACTGACGACATGGTTCTACACCCGTGCACGACGCTGCCCG           | CDKN2AEXON2_W_2_39.B | TACGGTAGCAGAGACTTGGTCTACTGCCTCTGGTCCCCCG              |
| CDKN2AEXON2_W_3_38.A | ACACTGACGACATGGTTCTACACTGGCCATCGCATGTGCGC            | CDKN2AEXON2_W_3_38.B | TACGGTAGCAGAGACTTGGTCTGGCTGAACCTTGTGCTGGAAAAATGAATG   |
| CDKN2AEXON3_C_1_37.A | ACACTGACGACATGGTTCTACACAGTTGTGGCCCTGTAGGACCTTCG      | CDKN2AEXON3_C_1_37.B | TACGGTAGCAGAGACTTGGTCTCCGGTAGGGACGGCAAGAGAGG          |
| CDKN2AEXON3_C_2_36.A | ACACTGACGACATGGTTCTACAATATAAATGGACATTTACGGTAGTGGGGGA | CDKN2AEXON3_C_2_36.B | TACGGTAGCAGAGACTTGGTCTGAGAACTCGGAACTTAGATCATCA        |
| CDKN2AEXON3_C_3_35.A | ACACTGACGACATGGTTCTACAAAATGCCACATGAATGTGCGCTTAGG     | CDKN2AEXON3_C_3_35.B | TACGGTAGCAGAGACTTGGTCTGCTGCTTTTAACTAGATATATGCT        |
| CDKN2AEXON3_W_1_34.A | ACACTGACGACATGGTTCTACATAACGCCTGTTTTCTTCTGCCCTCTGC    | CDKN2AEXON3_W_1_34.B | TACGGTAGCAGAGACTTGGTCTTTTTAAAGCTCTATTTCTAAATGAAAA     |
| CDKN2AEXON3_W_2_33.A | ACACTGACGACATGGTTCTACACCCCGCCACAACCCACCC             | CDKN2AEXON3_W_2_33.B | TACGGTAGCAGAGACTTGGTCTGTGAAAGGCAGAAGCGGTGTTTTCTTT     |
| FLT3EXON02_C_1_1.A   | ACACTGACGACATGGTTCTACAAATCATTTGTTTATGATTGATTAACAC    | FLT3EXON02_C_1_1.B   | TACGGTAGCAGAGACTTGGTCTTTTGTGTTTGGTTGCAAGATAAT         |
| FLT3EXON02_C_2_2.A   | ACACTGACGACATGGTTCTACACCCATTTAGCCATGGTAGGCTTCAATACT  | FLT3EXON02_C_2_2.B   | TACGGTAGCAGAGACTTGGTCTTACAAATCAAGATCTGCCTGTGATCAAGT   |
| FLT3EXON02_W_1_3.A   | ACACTGACGACATGGTTCTACACAACATTATCATTTTTATTTGTTTACAG   | FLT3EXON02_W_1_3.B   | TACGGTAGCAGAGACTTGGTCTTAAAGGTATAATTTAATGTTACTTTACCA   |
| FLT3EXON02_W_2_4.A   | ACACTGACGACATGGTTCTACACATCAGTGGGGAAGTCATCATCATATCCCA | FLT3EXON02_W_2_4.B   | TACGGTAGCAGAGACTTGGTCTATAGATGCTGTGTTGACCATGTGAGG      |
| FLT3EXON03_C_1_5.A   | ACACTGACGACATGGTTCTACATACATCCACTTCCACAGCGGCAGC       | FLT3EXON03_C_1_5.B   | TACGGTAGCAGAGACTTGGTCTGCATATGTTGATAAAGTTTTGATGTGAA    |
| FLT3EXON03_C_2_6.A   | ACACTGACGACATGGTTCTACACACTTACTGTTTTGTAATCAAAATGTGG   | FLT3EXON03_C_2_6.B   | TACGGTAGCAGAGACTTGGTCTGCGTTGAGACCCAGAGCTCAGG          |
| FLT3EXON03_C_3_7.A   | ACACTGACGACATGGTTCTACACAGCTGGGTGACAGAGAGAGACCC       | FLT3EXON03_C_3_7.B   | TACGGTAGCAGAGACTTGGTCTGTCTTAAAGCACAGCTCCCTGAATTGCC    |
| FLT3EXON03_W_1_8.A   | ACACTGACGACATGGTTCTACATGAATTCATTTGTTCTATCTGCAACGTAG  | FLT3EXON03_W_1_8.B   | TACGGTAGCAGAGACTTGGTCTCCAGAGACAGAAATGTTCCCTGGGG       |
| FLT3EXON03_W_2_9.A   | ACACTGACGACATGGTTCTACATCTGCTCCATCAGCTGCAAGTGCT       | FLT3EXON03_W_2_9.B   | TACGGTAGCAGAGACTTGGTCTAACAGAACTTGAACAAAATCCAAATGA     |
| FLT3EXON05_C_1_10.A  | ACACTGACGACATGGTTCTACAGCTCTGGAACGCTCTCAGATATGCAGA    | FLT3EXON05_C_1_10.B  | TACGGTAGCAGAGACTTGGTCTTTTATAATGACATAGAATCCTTTCTGA     |
| FLT3EXON05_C_2_11.A  | ACACTGACGACATGGTTCTACACATACAGCTTGATGTCAACTACATTAGAAA | FLT3EXON05_C_2_11.B  | TACGGTAGCAGAGACTTGGTCTACTTTAGAAAAATGGAAACCAGGACGCC    |
| FLT3EXON05_W_1_12.A  | ACACTGACGACATGGTTCTACAGTAAATGTTAATAACTTATGATGCTTTAG  | FLT3EXON05_W_1_12.B  | TACGGTAGCAGAGACTTGGTCTACCATGGATGTGCATACCTTTCCCCC      |
| FLT3EXON05_W_2_13.A  | ACACTGACGACATGGTTCTACACGATCGTGAATGGGTGCTTGGC         | FLT3EXON05_W_2_13.B  | TACGGTAGCAGAGACTTGGTCTCCATTTTTTAACTTAAAGAACCAAGTTT    |
| FLT3EXON08_C_1_14.A  | ACACTGACGACATGGTTCTACAGTCGTTTCTTCCACTGATGATAAAAAAGC  | FLT3EXON08_C_1_14.B  | TACGGTAGCAGAGACTTGGTCTGACAAGTTTGATTCTGAAAAATGCAGGAAC  |
| FLT3EXON08_C_2_15.A  | ACACTGACGACATGGTTCTACATCCACACTACAGCGACTAAAAATAGGAATA | FLT3EXON08_C_2_15.B  | TACGGTAGCAGAGACTTGGTCTACAAAACAGAACTATGATACGGATTCTGTTT |
| FLT3EXON08_W_1_16.A  | ACACTGACGACATGGTTCTACAAAATGCAAACTCTGTTTTATTAACACTAG  | FLT3EXON08_W_1_16.B  | TACGGTAGCAGAGACTTGGTCTGATGGTAACCAAAGCTGATTGACTGGGATG  |
| FLT3EXON08_W_2_17.A  | ACACTGACGACATGGTTCTACAACCGGATACTACACTTGTCTCTTCAAAG   | FLT3EXON08_W_2_17.B  | TACGGTAGCAGAGACTTGGTCTTCTTGTGTTGATAGTAGCATTATATTG     |
| FLT3EXON09_C_1_18.A  | ACACTGACGACATGGTTCTACAAGGCTTTAAACCTGACAGAAAAACAACT   | FLT3EXON09_C_1_18.B  | TACGGTAGCAGAGACTTGGTCTAACTGATGAATACAAAGTTATTTTATCTTC  |
| FLT3EXON09_C_2_19.A  | ACACTGACGACATGGTTCTACATTATGCTAAAAATGGTATCTTAGAGTCCTT | FLT3EXON09_C_2_19.B  | TACGGTAGCAGAGACTTGGTCTGTGAAGATTGAAATGACCAATATGAAG     |
| FLT3EXON09_W_1_20.A  | ACACTGACGACATGGTTCTACATAACTCATAAATGCCTATTTTTCTTACAG  | FLT3EXON09_W_1_20.B  | TACGGTAGCAGAGACTTGGTCTCTTTTCTCACAAAGAAATGATTTTCGAG    |
| FLT3EXON09_W_2_21.A  | ACACTGACGACATGGTTCTACAACCCACAATCAGATGTACGTGGACCTTC   | FLT3EXON09_W_2_21.B  | TACGGTAGCAGAGACTTGGTCTAAGTGAATTTGCTTCCATAAGTATAAACT   |

|                     |                                                      |                     |                                                       |
|---------------------|------------------------------------------------------|---------------------|-------------------------------------------------------|
| FLT3EXON11_C_1_22.A | ACACTGACGACATGGTTCTACAACCTCTCCAGGTCCAAGATGGTAATGGGT  | FLT3EXON11_C_1_22.B | TACGGTAGCAGAGACTTGGTCTCTCCACCTTGGCTTCACAAAGTATTGGT    |
| FLT3EXON11_C_2_23.A | ACACTGACGACATGGTTCTACAAAATATTTTCATCTTCTTAAACTGTA     | FLT3EXON11_C_2_23.B | TACGGTAGCAGAGACTTGGTCTCAAGTCAGGCGTCTGTTTCTCGGA        |
| FLT3EXON11_W_1_24.A | ACACTGACGACATGGTTCTACATGAGCTTATTTACACAGTCTTTTCTATAG  | FLT3EXON11_W_1_24.B | TACGGTAGCAGAGACTTGGTCTTATGTTCTTCCATTATAAGAGGCATCAAT   |
| FLT3EXON12_C_1_25.A | ACACTGACGACATGGTTCTACAATGTTTAGAGTACTGCTCGACACCCACTG  | FLT3EXON12_C_1_25.B | TACGGTAGCAGAGACTTGGTCTTGAATCTCTTTTAGAACTCGTGCAGAAAT   |
| FLT3EXON12_C_2_26.A | ACACTGACGACATGGTTCTACATGGTGAATATCACAAAGCAACTGTTGTA   | FLT3EXON12_C_2_26.B | TACGGTAGCAGAGACTTGGTCTGAATAGAAAGGCTAACAGAAAAGTGTGG    |
| FLT3EXON12_W_1_27.A | ACACTGACGACATGGTTCTACAGTCTAAATTTCTTGTATTTTTTTTTCAG   | FLT3EXON12_W_1_27.B | TACGGTAGCAGAGACTTGGTCTGATGTGCCAAGGGAATTGATGCACAGC     |
| FLT3EXON12_W_2_28.A | ACACTGACGACATGGTTCTACAGAGTGAAGCCATAAAAAGGGTCTGGTCA   | FLT3EXON12_W_2_28.B | TACGGTAGCAGAGACTTGGTCTGTAAAATCCCAAGTAAAAGTCAGCGAT     |
| FLT3EXON15_C_1_29.A | ACACTGACGACATGGTTCTACAAAATTAGCAGGGTTAAACGACAATGAAGA  | FLT3EXON15_C_1_29.B | TACGGTAGCAGAGACTTGGTCTAGGATGTGAGAGATTATAATGAGTTGCCA   |
| FLT3EXON15_C_2_30.A | ACACTGACGACATGGTTCTACACTTTCATACCTAAATGCTTCAGAGATGAA  | FLT3EXON15_C_2_30.B | TACGGTAGCAGAGACTTGGTCTCATTCTATGCAACAATTGGTGTGTCTCC    |
| FLT3EXON15_C_3_31.A | ACACTGACGACATGGTTCTACATTACCAAACCTAAATTTCTCTGGAAAC    | FLT3EXON15_C_3_31.B | TACGGTAGCAGAGACTTGGTCTAGAAGTGCCTATTCTAACTGACTCATCAT   |
| FLT3EXON15_C_4_32.A | ACACTGACGACATGGTTCTACAACCTTTCCAAAAGCACCTGATCCTAGTACC | FLT3EXON15_C_4_32.B | TACGGTAGCAGAGACTTGGTCTCAGAGAAATGAATATGATCTCAAATGGGA   |
| FLT3EXON15_C_5_33.A | ACACTGACGACATGGTTCTACAGCCTCCCATTTTTGTGCATCTTGTGTC    | FLT3EXON15_C_5_33.B | TACGGTAGCAGAGACTTGGTCTCAGTACTCACCATTTGTCTTGCAGGG      |
| FLT3EXON15_W_1_34.A | ACACTGACGACATGGTTCTACATCATCGCTGAGTGACACTCTTTTGTGCA   | FLT3EXON15_W_1_34.B | TACGGTAGCAGAGACTTGGTCTGAGATAGAGAAAAGAAATGAATTTTTA     |
| FLT3EXON15_W_2_35.A | ACACTGACGACATGGTTCTACAGTCAACAAGTACAAAAGGTAAGCAAAGG   | FLT3EXON15_W_2_35.B | TACGGTAGCAGAGACTTGGTCTAAATCAACGTAGAAAGTACTCATTATCTGAG |
| FLT3EXON15_W_3_36.A | ACACTGACGACATGGTTCTACACCAGCTACAGATGGTACAGGTGACCG     | FLT3EXON15_W_3_36.B | TACGGTAGCAGAGACTTGGTCTCATTTTAAAGATTTTCCAATGAAAAGAAA   |
| FLT3EXON15_W_4_37.A | ACACTGACGACATGGTTCTACAGAATGGAATGTGCCAATGTTTCTGCAGC   | FLT3EXON15_W_4_37.B | TACGGTAGCAGAGACTTGGTCTTGTGACGGCAACTGGATTGAGACTCC      |
| FLT3EXON15_W_5_38.A | ACACTGACGACATGGTTCTACAGATGAACGCAACAGCTTATGGAATTAGCAA | FLT3EXON15_W_5_38.B | TACGGTAGCAGAGACTTGGTCTATGGCAAACAGTAACCATTAAAAGGATGGA  |
| FLT3EXON16_C_1_39.A | ACACTGACGACATGGTTCTACAGCAGGTTCAACAATTTCTCTGGCTTCC    | FLT3EXON16_C_1_39.B | TACGGTAGCAGAGACTTGGTCTTGTACTCTGAGCTGAGAAAAATTTTATTTA  |
| FLT3EXON16_C_2_40.A | ACACTGACGACATGGTTCTACAAGAATAAAAAGAGAGAGAGAGAGAGA     | FLT3EXON16_C_2_40.B | TACGGTAGCAGAGACTTGGTCTCATGTGCAAGTCAAGATGATGACCCAGC    |
| FLT3EXON16_W_1_41.A | ACACTGACGACATGGTTCTACATTACATTTTTAATGCTCTTTCTTTGACAG  | FLT3EXON16_W_1_41.B | TACGGTAGCAGAGACTTGGTCTAGTCTTTTGTGAGGTGATTTCTGTGGAA    |
| FLT3EXON17_C_1_42.A | ACACTGACGACATGGTTCTACATCCAAGTCTGTGAAAATTTTCTCTTTAC   | FLT3EXON17_C_1_42.B | TACGGTAGCAGAGACTTGGTCTCCCTCCTAAGAGTATGTTGTCTGTACATA   |
| FLT3EXON17_C_2_43.A | ACACTGACGACATGGTTCTACAACACTTTGCTACGTTCTATGATGTGTAAT  | FLT3EXON17_C_2_43.B | TACGGTAGCAGAGACTTGGTCTGCTATGGTGTCTTCTCAACTATCTAAGAA   |
| FLT3EXON17_W_1_44.A | ACACTGACGACATGGTTCTACATGCCTATAATTTGAAACTGTAATTTTCAG  | FLT3EXON17_W_1_44.B | TACGGTAGCAGAGACTTGGTCTAATTTGGATGTGATTGAAAAGTGGGGTAAA  |
| FLT3EXON17_W_2_45.A | ACACTGACGACATGGTTCTACACAGAGATTTTCAAGGAACACAATTTAGTT  | FLT3EXON17_W_2_45.B | TACGGTAGCAGAGACTTGGTCTCAGGACCCACAGACTTACGGTGC         |
| FLT3EXON19_C_1_46.A | ACACTGACGACATGGTTCTACAATATTACCTTCAGAGTGAATGAATCCCA   | FLT3EXON19_C_1_46.B | TACGGTAGCAGAGACTTGGTCTAATCCATTTATTTGATGAATTACATTTTA   |
| FLT3EXON19_C_2_47.A | ACACTGACGACATGGTTCTACAAGTATCATCTGACAATTAGCAAATTTTAA  | FLT3EXON19_C_2_47.B | TACGGTAGCAGAGACTTGGTCTCCGGACTCGGATCAAATCTCAGGG        |
| FLT3EXON19_W_1_48.A | ACACTGACGACATGGTTCTACAAAATAATGAAAAAACAAAATTTTTAATAG  | FLT3EXON19_W_1_48.B | TACGGTAGCAGAGACTTGGTCTATAGCTAACATAAAAACCTTTGCATTCAATT |
| FLT3EXON21_C_1_1.A  | ACACTGACGACATGGTTCTACAGATATCTCGAGCCAATCCAAAGTCACATAT | FLT3EXON21_C_1_1.B  | TACGGTAGCAGAGACTTGGTCTACCTCCTACTGAAGTTGAGCTAGAAGAAA   |
| FLT3EXON21_C_2_2.A  | ACACTGACGACATGGTTCTACATGCACCACAGTGAGTGCAGTTGTTTAC    | FLT3EXON21_C_2_2.B  | TACGGTAGCAGAGACTTGGTCTGTGCTTGTCCACCACGGGAAAGTG        |
| FLT3EXON21_W_1_3.A  | ACACTGACGACATGGTTCTACATAAATAACTCTGGTGTCTTCTTGTGACAG  | FLT3EXON21_W_1_3.B  | TACGGTAGCAGAGACTTGGTCTAAAATAAGTAGGAAATAGCAGCCTCACATT  |
| FLT3EXON21_W_2_4.A  | ACACTGACGACATGGTTCTACAATGAGTGATTTCAACTATGTTGTGACGGGC | FLT3EXON21_W_2_4.B  | TACGGTAGCAGAGACTTGGTCTTTTAAAGCATAAGTAAGCAGACTGCTGTGA  |
| FLT3EXON23_C_1_5.A  | ACACTGACGACATGGTTCTACATAGCATAAAATGGCTGATCCATTTTAAATC | FLT3EXON23_C_1_5.B  | TACGGTAGCAGAGACTTGGTCTTGGCAGATCTCAATACGTGTTTAAATGAAT  |
| FLT3EXON23_C_2_6.A  | ACACTGACGACATGGTTCTACAATCCTATACGCTTTGCACTAAGGAGTTTGA | FLT3EXON23_C_2_6.B  | TACGGTAGCAGAGACTTGGTCTATGCTAACTTCTACAAAAGTATTCAAATG   |
| FLT3EXON23_W_1_7.A  | ACACTGACGACATGGTTCTACAATGGCTGCAATTTGTCTAATGTTTTCTCAG | FLT3EXON23_W_1_7.B  | TACGGTAGCAGAGACTTGGTCTAGACTGTACCTTTCTGATTTCAACCAAATT  |
| FLT3EXON24_C_1_8.A  | ACACTGACGACATGGTTCTACAGCCAGCTGACATCCTAAAACGAAGTCAAA  | FLT3EXON24_C_1_8.B  | TACGGTAGCAGAGACTTGGTCTGGAATAAATGGTGTCTCATTATATGAAAA   |
| FLT3EXON24_C_2_9.A  | ACACTGACGACATGGTTCTACAGAGAATGACAACCTGGTACCTTTGGTTTAC | FLT3EXON24_C_2_9.B  | TACGGTAGCAGAGACTTGGTCTGACTCAAGGAAACGGCCATCTCTCC       |
| FLT3EXON24_W_1_10.A | ACACTGACGACATGGTTCTACAATCTTGTCTTGTCTATTGCTTTTACAG    | FLT3EXON24_W_1_10.B | TACGGTAGCAGAGACTTGGTCTCAATTTCTTTGTAAGCTTTATAAAGTCC    |
| FLT3EXON25_C_1_11.A | ACACTGACGACATGGTTCTACATAGCCCAAATCCATCTCTGTGCTGAAAG   | FLT3EXON25_C_1_11.B | TACGGTAGCAGAGACTTGGTCTGTTTTTATTTAAATAATTTGTAATATGGGC  |
| FLT3EXON25_C_2_12.A | ACACTGACGACATGGTTCTACATTAGTGATGAAATTAATCTTGTTTGGTAA  | FLT3EXON25_C_2_12.B | TACGGTAGCAGAGACTTGGTCTGAATGTCTCACACTACCAAACAGGGC      |

|                     |                                                        |                     |                                                       |
|---------------------|--------------------------------------------------------|---------------------|-------------------------------------------------------|
| FLT3EXON25_W_1_13.A | ACACTGACGACATGGTTCTACAATCAGTGTCTGTCTCTTTCCACATTGAG     | FLT3EXON25_W_1_13.B | TACGGTAGCAGAGACTTGGTCTTGAAGTCCTTAAACTAAATTGTTCTCTA    |
| FLT3EXON25_W_2_14.A | ACACTGACGACATGGTTCTACTCTCTCCGAGGCTCAGGTCG              | FLT3EXON25_W_2_14.B | TACGGTAGCAGAGACTTGGTCTAAACGAGACAGCTTCTAGAGAAAAGTCTG   |
| JAK2EXON04_C_1_48.A | ACACTGACGACATGGTTCTACACATATCTAACACTGCCATCCCAAGACATTC   | JAK2EXON04_C_1_48.B | TACGGTAGCAGAGACTTGGTCTTCTGAAAATTATGATTAATAATAATCAT    |
| JAK2EXON04_C_2_47.A | ACACTGACGACATGGTTCTACATATATACGAATTATATAAAATCTCTACTCA   | JAK2EXON04_C_2_47.B | TACGGTAGCAGAGACTTGGTCTAAAGTACCTGTGACTCATGAACACAGGAA   |
| JAK2EXON04_W_1_46.A | ACACTGACGACATGGTTCTACAGAGATATTTCTTCAAATTTTGGTTTTAG     | JAK2EXON04_W_1_46.B | TACGGTAGCAGAGACTTGGTCTTACCTGATAGAGTTATAGATGGCCAGTGG   |
| JAK2EXON04_W_2_45.A | ACACTGACGACATGGTTCTACAATGAGAATAGCCAAAGAAAACGATCAAACC   | JAK2EXON04_W_2_45.B | TACGGTAGCAGAGACTTGGTCTTAGATAAAGGAGTACTTAAGTAGTATTACA  |
| JAK2EXON06_C_1_44.A | ACACTGACGACATGGTTCTACATAAAGTGGCTTTCATTTGAAACCTCTTG     | JAK2EXON06_C_1_44.B | TACGGTAGCAGAGACTTGGTCTATTGGAAAGAATGTTGCTTCTTAAGTCT    |
| JAK2EXON06_C_2_43.A | ACACTGACGACATGGTTCTACACCAGAAAATAATTTGGTACTAAGATTCTA    | JAK2EXON06_C_2_43.B | TACGGTAGCAGAGACTTGGTCTATTATTGATGTCAGTATTAAGCAAGCAAAC  |
| JAK2EXON06_W_1_42.A | ACACTGACGACATGGTTCTACAGTTTTAATTTTACATGCTTTAATTATAG     | JAK2EXON06_W_1_42.B | TACGGTAGCAGAGACTTGGTCTAACCATTTCAATCATAAAGCAAACCTTAC   |
| JAK2EXON09_C_1_41.A | ACACTGACGACATGGTTCTACAGCTGAAGTCTTCTTTGCCCAGTGGT        | JAK2EXON09_C_1_41.B | TACGGTAGCAGAGACTTGGTCTGCTTGTCTTGTGATATCATTTTGCAGAA    |
| JAK2EXON09_C_2_40.A | ACACTGACGACATGGTTCTACAAAATAACTAGAAAATTATCTTACCTTTTGG   | JAK2EXON09_C_2_40.B | TACGGTAGCAGAGACTTGGTCTTGTATTACAAAAAATGAGAATGAAGAGTAC  |
| JAK2EXON09_C_3_39.A | ACACTGACGACATGGTTCTACATGCTGTACAATAAGAATAAAGATAAAATTA   | JAK2EXON09_C_3_39.B | TACGGTAGCAGAGACTTGGTCTTCCAGTTTACTAAATGCTGTCCCCAAAG    |
| JAK2EXON09_W_1_38.A | ACACTGACGACATGGTTCTACTCCCTTTCTTTATAATTAACCTTATACAG     | JAK2EXON09_W_1_38.B | TACGGTAGCAGAGACTTGGTCTAATTATATTGTCTGAGCGAACAGTTCCAT   |
| JAK2EXON09_W_2_37.A | ACACTGACGACATGGTTCTACAAGTCTTAAAGATCTTTTGAATTGTTACCAG   | JAK2EXON09_W_2_37.B | TACGGTAGCAGAGACTTGGTCTTGAATCAATGTACTGAAGATACTTACGCG   |
| JAK2EXON10_C_1_36.A | ACACTGACGACATGGTTCTACATTTGGTTCATATGAGTAGGCCCTCTGTAATG  | JAK2EXON10_C_1_36.B | TACGGTAGCAGAGACTTGGTCTACGTAGAACACATTTTCACTTCTCTT      |
| JAK2EXON10_C_2_35.A | ACACTGACGACATGGTTCTACAAATGTCACATGAATGTAATCAAGAAAACA    | JAK2EXON10_C_2_35.B | TACGGTAGCAGAGACTTGGTCTATGGTGTCTGTATGTACCAACCTCACAA    |
| JAK2EXON10_W_1_34.A | ACACTGACGACATGGTTCTACAAAGTATATATATGATTTTATTTTTCAG      | JAK2EXON10_W_1_34.B | TACGGTAGCAGAGACTTGGTCTAATGAGTATCTAATGACTTACAAATATCA   |
| JAK2EXON10_W_2_33.A | ACACTGACGACATGGTTCTACATGGTGTTCACAAAATCAGAAATGAAGATT    | JAK2EXON10_W_2_33.B | TACGGTAGCAGAGACTTGGTCTATTTTTCATAAGAAAAATTTAAATCAC     |
| JAK2EXON11_C_1_32.A | ACACTGACGACATGGTTCTACATTTCTGTTTCATGCAAGTGGACCGTAGTCTCC | JAK2EXON11_C_1_32.B | TACGGTAGCAGAGACTTGGTCTAAAAAATTTCTTCTTGAATGATTTTTC     |
| JAK2EXON11_C_2_31.A | ACACTGACGACATGGTTCTACAGAGTACGTTGTATGCATATGAGAGCACATC   | JAK2EXON11_C_2_31.B | TACGGTAGCAGAGACTTGGTCTAAGATTTTAAAGGCGTACGAAGAGAAGTA   |
| JAK2EXON11_W_1_30.A | ACACTGACGACATGGTTCTACAATCTTTTCTTTTACCTTTTCTCTTGAAG     | JAK2EXON11_W_1_30.B | TACGGTAGCAGAGACTTGGTCTAAGAACATACACACCTCTGAATAGTTTCT   |
| JAK2EXON11_W_2_29.A | ACACTGACGACATGGTTCTACAGTTCTTTTAAAGTTCTGGATAAAGCACAC    | JAK2EXON11_W_2_29.B | TACGGTAGCAGAGACTTGGTCTGTATCCTCAGAAAAGTCTTGACACATTTA   |
| JAK2EXON12_C_1_28.A | ACACTGACGACATGGTTCTACAACCTCTGCTCCACAGACACATACTCCA      | JAK2EXON12_C_1_28.B | TACGGTAGCAGAGACTTGGTCTAGTGCATCTTTATTATGGCAGAGAGAATTT  |
| JAK2EXON12_C_2_27.A | ACACTGACGACATGGTTCTACACTTAACTCCTGTTAAATATAGTTTACT      | JAK2EXON12_C_2_27.B | TACGGTAGCAGAGACTTGGTCTAAGCTTTTCTACAAGCATTGGTTTTAAAT   |
| JAK2EXON12_W_1_26.A | ACACTGACGACATGGTTCTACAACAATCTTTGTACTTTTTTTTTCTTAG      | JAK2EXON12_W_1_26.B | TACGGTAGCAGAGACTTGGTCTTCTATATAAAACAAAACAGATGCTCTGAG   |
| JAK2EXON13_C_1_25.A | ACACTGACGACATGGTTCTACACAAGTTTCCATAATATATTTATACAATTTT   | JAK2EXON13_C_1_25.B | TACGGTAGCAGAGACTTGGTCTTGGTCCACATGTAAGTATAAAGATTTAAAT  |
| JAK2EXON13_C_2_24.A | ACACTGACGACATGGTTCTACATTTGTTCCAGGTAAGATAATTTGTATA      | JAK2EXON13_C_2_24.B | TACGGTAGCAGAGACTTGGTCTGATCACTAGATACATATCTGAAAAAGAATA  |
| JAK2EXON13_W_1_23.A | ACACTGACGACATGGTTCTACACTTATTATTACTTATATTTAATGCAG       | JAK2EXON13_W_1_23.B | TACGGTAGCAGAGACTTGGTCTATAAAAAGTTGTACTACTACTAGAAAAAT   |
| JAK2EXON13_W_2_22.A | ACACTGACGACATGGTTCTACAAGTGTCTAAACAGTTGGCATGGGCC        | JAK2EXON13_W_2_22.B | TACGGTAGCAGAGACTTGGTCTCTTTTATCACCTAACACAGACTATTTTA    |
| JAK2EXON14_C_1_21.A | ACACTGACGACATGGTTCTACAGAAAGGAGGATTTCTGTCTTCTGTCTTC     | JAK2EXON14_C_1_21.B | TACGGTAGCAGAGACTTGGTCTCTTAAATCTGTTTTGGGGGCTTGAACAT    |
| JAK2EXON14_C_2_20.A | ACACTGACGACATGGTTCTACAACAACATGCCCTTACACCACTGCC         | JAK2EXON14_C_2_20.B | TACGGTAGCAGAGACTTGGTCTTGCCAAAAAATATTCTGCTTATCAGAGAA   |
| JAK2EXON14_W_1_19.A | ACACTGACGACATGGTTCTACATTTGAATATATGTGCGTTTAACTCTAATAG   | JAK2EXON14_W_1_19.B | TACGGTAGCAGAGACTTGGTCTCTAGAACTTACTGTCTTTGGCAAACCTGT   |
| JAK2EXON14_W_2_18.A | ACACTGACGACATGGTTCTACAATCAAACCTAGTATCCTGGCATTAGTATT    | JAK2EXON14_W_2_18.B | TACGGTAGCAGAGACTTGGTCTAAAGTGATAATTTTATTATTAATCAGGAAC  |
| JAK2EXON16_C_1_17.A | ACACTGACGACATGGTTCTACATTCATAATCCATACAAATTTTATAAGGTT    | JAK2EXON16_C_1_17.B | TACGGTAGCAGAGACTTGGTCTGATTTGATTTTTTATAGCCCTCAATTTTA   |
| JAK2EXON16_C_2_16.A | ACACTGACGACATGGTTCTACATCATTAAATACAATAAAGATAGAAAAGCTGG  | JAK2EXON16_C_2_16.B | TACGGTAGCAGAGACTTGGTCTTCTCTGACCAAAGTGGGCAGAATTAG      |
| JAK2EXON16_W_1_15.A | ACACTGACGACATGGTTCTACATATTCTCAGTTTGGTCTTTAATTATAG      | JAK2EXON16_W_1_15.B | TACGGTAGCAGAGACTTGGTCTGGAGTAAACAAAACCTGTTAAGATCTCGTAT |
| JAK2EXON16_W_2_14.A | ACACTGACGACATGGTTCTACACCAGATTTAGGCCTTTTCAGAGCCA        | JAK2EXON16_W_2_14.B | TACGGTAGCAGAGACTTGGTCTTAAAGAGGGCCAAATGACATCAAGAAAAT   |
| JAK2EXON17_C_1_13.A | ACACTGACGACATGGTTCTACATAGGATCCCGTCTTCAAAGGCCACC        | JAK2EXON17_C_1_13.B | TACGGTAGCAGAGACTTGGTCTGATTTTGGTCAACTTGAATGTATATC      |
| JAK2EXON17_C_2_12.A | ACACTGACGACATGGTTCTACAACCTTAGAAACGCTCTTAAAGTTTTCTAA    | JAK2EXON17_C_2_12.B | TACGGTAGCAGAGACTTGGTCTTACCAATATGAGGATAGGTGCCCTGGGG    |



|                     |                                                       |                     |                                                      |
|---------------------|-------------------------------------------------------|---------------------|------------------------------------------------------|
| JAK2EXON17_W_1_11.A | ACACTGACGACATGGTTCTACATTAAGGTGATAATATTCTTTATTTCTCCAG  | JAK2EXON17_W_1_11.B | TACGGTAGCAGAGACTTGGTCTTCTGACAATTTACCTTGCCAAGTTGCTGTA |
| JAK2EXON17_W_2_10.A | ACACTGACGACATGGTTCTACACACAGTTTGAAGAGAGACATTTGAAATTTTC | JAK2EXON17_W_2_10.B | TACGGTAGCAGAGACTTGGTCTACATCTGACAACCAAACCTTTTTTTTCTAC |
| JAK2EXON18_C_1_9.A  | ACACTGACGACATGGTTCTACAACATGCTGAAGCTTTTTACAGCGACCAC    | JAK2EXON18_C_1_9.B  | TACGGTAGCAGAGACTTGGTCTGCTACTAGAATTTTCTATATAATTATAAAA |
| JAK2EXON18_C_2_8.A  | ACACTGACGACATGGTTCTACAGGTTTCAATGGGCAGCTTACCAGCAC      | JAK2EXON18_C_2_8.B  | TACGGTAGCAGAGACTTGGTCTTATGACCCCTACAGGACAACACTGGGG    |
| JAK2EXON18_C_3_7.A  | ACACTGACGACATGGTTCTACACACAATCTAGTCATTATAGAATGCCTCT    | JAK2EXON18_C_3_7.B  | TACGGTAGCAGAGACTTGGTCTGACAACATTGTAAGTACAAGGGAGTGTGC  |
| JAK2EXON18_W_1_6.A  | ACACTGACGACATGGTTCTACAATTTCCATCTAATGTGATGTGTCATTAG    | JAK2EXON18_W_1_6.B  | TACGGTAGCAGAGACTTGGTCTATGCTGTAGGGATTTACAGATTCAATTTTC |
| JAK2EXON18_W_2_5.A  | ACACTGACGACATGGTTCTACAACGAAGAGCACCTAAGAGACTTTGAAGGG   | JAK2EXON18_W_2_5.B  | TACGGTAGCAGAGACTTGGTCTTAAAGACATTGTACATTTATATTACACAGG |
| JAK2EXON19_C_1_4.A  | ACACTGACGACATGGTTCTACATGTGATCTATCCGTTCTTTATGTTTTGAA   | JAK2EXON19_C_1_4.B  | TACGGTAGCAGAGACTTGGTCTGTTTAAAGTCATTATGTATGATAGTTTTTC |
| JAK2EXON19_C_2_3.A  | ACACTGACGACATGGTTCTACAATCTATGAAAACGCTAGATGATTTCTAA    | JAK2EXON19_C_2_3.B  | TACGGTAGCAGAGACTTGGTCTATTTACCATATGGAAGTTTACGAGACTATC |
| JAK2EXON19_W_1_2.A  | ACACTGACGACATGGTTCTACAAAAACATTATTTCCACCTTTATGTTAAAAG  | JAK2EXON19_W_1_2.B  | TACGGTAGCAGAGACTTGGTCTAGCAAATAATCAGGATATTAGTTACCTTGC |
| JAK2EXON19_W_2_1.A  | ACACTGACGACATGGTTCTACATAAAACTTCTGCAGTACACATCTCAGATAT  | JAK2EXON19_W_2_1.B  | TACGGTAGCAGAGACTTGGTCTCAGTAGTTTTATAAATAAAACAATTTAA   |
| JAK2EXON23_C_1_48.A | ACACTGACGACATGGTTCTACACCTATTTGATCCACTCGAAGAGCTAGATC   | JAK2EXON23_C_1_48.B | TACGGTAGCAGAGACTTGGTCTATGTGCCCTGATTGAAAATTAATGTCTTC  |
| JAK2EXON23_C_2_47.A | ACACTGACGACATGGTTCTACAATTTATATAATAATGATATATGTAATAATA  | JAK2EXON23_C_2_47.B | TACGGTAGCAGAGACTTGGTCTAATAATGTAATCAACGCCCTCCTTAGG    |
| JAK2EXON23_W_1_46.A | ACACTGACGACATGGTTCTACATTTAATTTTGGTTATTTTCTCCTTACAG    | JAK2EXON23_W_1_46.B | TACGGTAGCAGAGACTTGGTCTTCTGTAAATCTACTTTGGTCTCAGAATGA  |
| KRASEXON01_C_1_48.A | ACACTGACGACATGGTTCTACAGTCCACAAAATGATTCTGAATTAGCTGTAT  | KRASEXON01_C_1_48.B | TACGGTAGCAGAGACTTGGTCTGGTGGAGATTTGATAGTGTATTAACTTA   |
| KRASEXON01_C_2_47.A | ACACTGACGACATGGTTCTACATATCTTGAATAAGTACTCATGAAAATGGT   | KRASEXON01_C_2_47.B | TACGGTAGCAGAGACTTGGTCTGCTGGTGGCGTAGGCAAGAGTG         |
| KRASEXON01_W_1_46.A | ACACTGACGACATGGTTCTACATCATTATTTTATTATAAGGCCTGCTGAAA   | KRASEXON01_W_1_46.B | TACGGTAGCAGAGACTTGGTCTGCTGCACCAGTAATATGCATATTAAC     |
| KRASEXON03_C_1_45.A | ACACTGACGACATGGTTCTACACATTGCACTGTACTCCTCTTGACCTGCT    | KRASEXON03_C_1_45.B | TACGGTAGCAGAGACTTGGTCTTGAATTTTTTGTGTTGAGTTGTATATAA   |
| KRASEXON03_C_2_44.A | ACACTGACGACATGGTTCTACATGTGAGCTTATTATATTCAATTTAAACCCA  | KRASEXON03_C_2_44.B | TACGGTAGCAGAGACTTGGTCTGGAGAAACCTGTCTCTTGATATTCTCGAC  |
| KRASEXON03_W_1_43.A | ACACTGACGACATGGTTCTACAATAATCCAGACTGTGTTTCTCCCTTCTCAG  | KRASEXON03_W_1_43.B | TACGGTAGCAGAGACTTGGTCTAGTATTATTTATGGCAAATACACAAAGAAA |
| KRASEXON03_W_2_42.A | ACACTGACGACATGGTTCTACAAGGGACCAGTACATGAGGACTGGGG       | KRASEXON03_W_2_42.B | TACGGTAGCAGAGACTTGGTCTAATATTATATGCATGGCATTAGCAAAGACT |
| KRASEXON04_C_1_41.A | ACACTGACGACATGGTTCTACAGTGTCTACTGTTCTAGAAGGCCAAATCACAT | KRASEXON04_C_1_41.B | TACGGTAGCAGAGACTTGGTCTCAGCCAAATTTTATGACAAAAGTTGTGGAC |
| KRASEXON04_C_2_40.A | ACACTGACGACATGGTTCTACAAGTTATGATTTGCAGAAAACAGATCTGTA   | KRASEXON04_C_2_40.B | TACGGTAGCAGAGACTTGGTCTAGATGTACCTATTGGTCTAGTAGGAAATAA |
| KRASEXON04_W_1_39.A | ACACTGACGACATGGTTCTACAACGTGTGCTATAACTTTTTTTCTTTCCAG   | KRASEXON04_W_1_39.B | TACGGTAGCAGAGACTTGGTCTTTGCTGATGTTTCAATAAAAGGAATTCCA  |
| KRASEXON04_W_2_38.A | ACACTGACGACATGGTTCTACAAAAACAGGCTCAGGACTTAGCAAGAAGTTA  | KRASEXON04_W_2_38.B | TACGGTAGCAGAGACTTGGTCTTTGTTTTATTTCTAGTATAGCATAATTGA  |
| KRASEXON05_C_1_37.A | ACACTGACGACATGGTTCTACAACAGCCAGGAGTCTTTTCTTTGCTGA      | KRASEXON05_C_1_37.B | TACGGTAGCAGAGACTTGGTCTCATAATCTCAAACCTCTTGACATGGCTTT  |
| KRASEXON05_C_2_36.A | ACACTGACGACATGGTTCTACATAAGTAGTCTAAAGTGGTGCACCTTGT     | KRASEXON05_C_2_36.B | TACGGTAGCAGAGACTTGGTCTAGGGAGATCCGACAATACAGATTGAAAAAA |
| KRASEXON05_W_1_35.A | ACACTGACGACATGGTTCTACAACITTAAGAAGTTGTGTTTTACAATGCAG   | KRASEXON05_W_1_35.B | TACGGTAGCAGAGACTTGGTCTAATTAATGTGCTGAACITTAACCTACCAGA |
| NRASEXON01_C_1_1.A  | ACACTGACGACATGGTTCTACAATCTACAAAAGTGGTTCTGGATTAGCTGGAT | NRASEXON01_C_1_1.B  | TACGGTAGCAGAGACTTGGTCTCATTGATTATAGAAGCTTTAAAGTACTGT  |
| NRASEXON01_C_2_2.A  | ACACTGACGACATGGTTCTACATACTTTCTCTCCTTATTCTTTAATACA     | NRASEXON01_C_2_2.B  | TACGGTAGCAGAGACTTGGTCTCAGGTTGGTGTGGGAAAAGCGC         |
| NRASEXON01_W_1_3.A  | ACACTGACGACATGGTTCTACATGGTTTCCAACAGTTCTTGCTGGTGT      | NRASEXON01_W_1_3.B  | TACGGTAGCAGAGACTTGGTCTGAGACAGGATCAGGTCAGCGGGC        |
| NRASEXON02_C_1_4.A  | ACACTGACGACATGGTTCTACACATGGCACTGTACTCTTCTGTCCAGCT     | NRASEXON02_C_1_4.B  | TACGGTAGCAGAGACTTGGTCTAACCTTGGCAATAGCATTGCATTCCTGT   |
| NRASEXON02_C_2_5.A  | ACACTGACGACATGGTTCTACAATCCTTTCAGAGAAAATAATGCTCCTAGTA  | NRASEXON02_C_2_5.B  | TACGGTAGCAGAGACTTGGTCTGGTGAACCTGTTTGTGGACATACTGGAT   |
| NRASEXON02_W_1_6.A  | ACACTGACGACATGGTTCTACATCCCTGCCCTTACCTCCA              | NRASEXON02_W_1_6.B  | TACGGTAGCAGAGACTTGGTCTGCTATTATTGATGGCAAATACACAGAGGAA |
| NRASEXON02_W_2_7.A  | ACACTGACGACATGGTTCTACAAGAGACCAATACATGAGGACAGGCGAAGG   | NRASEXON02_W_2_7.B  | TACGGTAGCAGAGACTTGGTCTGCTCTATCTTCCCTAGTGTGGTAACCTCAT |
| NRASEXON03_C_1_8.A  | ACACTGACGACATGGTTCTACAGTATCAACTGCTCTTGTGGCAAATCACAC   | NRASEXON03_C_1_8.B  | TACGGTAGCAGAGACTTGGTCTCTCCAAAGTCTGAGATTGCAGGC        |
| NRASEXON03_C_2_9.A  | ACACTGACGACATGGTTCTACATTAATCAACTGATGCAAACCTTGACACAAA  | NRASEXON03_C_2_9.B  | TACGGTAGCAGAGACTTGGTCTGATGTACCTATGGTGTAGTGGAAACAA    |
| NRASEXON03_W_1_10.A | ACACTGACGACATGGTTCTACATATGTTCTGATAATATATCCGTTTTTAG    | NRASEXON03_W_1_10.B | TACGGTAGCAGAGACTTGGTCTTGGCTGAGGTTTCAATGAATGGAATCCCG  |
| NRASEXON03_W_2_11.A | ACACTGACGACATGGTTCTACAAAAACAAGCCACGAAGTGGCCAAAG       | NRASEXON03_W_2_11.B | TACGGTAGCAGAGACTTGGTCTAAAAATGAAAAAATGCATAACAACAAGA   |

|                       |                                                       |                       |                                                      |
|-----------------------|-------------------------------------------------------|-----------------------|------------------------------------------------------|
| PTPN11EXON02_C_1_1.A  | ACACTGACGACATGGTTCTACATTACTAGGCCTTGCCAAAAAAGTCCATCA   | PTPN11EXON02_C_1_1.B  | TACGGTAGCAGAGACTTGGTCTTGCTCATAATGCGTCTTAGCTGTGTTGTTG |
| PTPN11EXON02_C_2_2.A  | ACACTGACGACATGGTTCTACAATGACGGCAGCAAGCTATCCAAGC        | PTPN11EXON02_C_2_2.B  | TACGGTAGCAGAGACTTGGTCTGGCAGAAAACCTACTGTTGACAAGAGGAGT |
| PTPN11EXON02_W_1_3.A  | ACACTGACGACATGGTTCTACATTTATTACTTACTTTGTCTTTCTTTTTAAG  | PTPN11EXON02_W_1_3.B  | TACGGTAGCAGAGACTTGGTCTGGATCCTCTCTTTTCATTCCAACCTACCTA |
| PTPN11EXON02_W_2_4.A  | ACACTGACGACATGGTTCTACAAAAGTAACCTGGAGACTTCACACTTCCG    | PTPN11EXON02_W_2_4.B  | TACGGTAGCAGAGACTTGGTCTGAGGCCACTCCCAAAACCTGTA         |
| PTPN11EXON03_C_1_5.A  | ACACTGACGACATGGTTCTACATCAGCCAAAGTGGCAAATTTCTCCCT      | PTPN11EXON03_C_1_5.B  | TACGGTAGCAGAGACTTGGTCTGTAATAATCCGACGTGGAAGATGAGATCTG |
| PTPN11EXON03_C_2_6.A  | ACACTGACGACATGGTTCTACATAAAATGTTACTGACCTTCAGAGGTAGGA   | PTPN11EXON03_C_2_6.B  | TACGGTAGCAGAGACTTGGTCTCAGAACACTGGTGATTACTATGACCTGTA  |
| PTPN11EXON03_C_3_7.A  | ACACTGACGACATGGTTCTACAATCTTTAAAGATTACAGCTCAAAAACAG    | PTPN11EXON03_C_3_7.B  | TACGGTAGCAGAGACTTGGTCTGAGCTTAATATCCTCTGAACTGTGCAGA   |
| PTPN11EXON03_W_1_8.A  | ACACTGACGACATGGTTCTACACTGCCTCCCTTCCAATGGACTATTTAG     | PTPN11EXON03_W_1_8.B  | TACGGTAGCAGAGACTTGGTCTATGACATCTCCATTCTCTCTTTTAATTGC  |
| PTPN11EXON03_W_2_9.A  | ACACTGACGACATGGTTCTACAGTTGGTCCAGTATTACATGGAACATCACGG  | PTPN11EXON03_W_2_9.B  | TACGGTAGCAGAGACTTGGTCTACAGACCCTCATGCATTCTGACTCA      |
| PTPN11EXON04_C_1_10.A | ACACTGACGACATGGTTCTACATGGCTCTCTCGTACAAGAAAACACCATGT   | PTPN11EXON04_C_1_10.B | TACGGTAGCAGAGACTTGGTCTAGGAGAGCTGACTGTATACAGTAGTTTTGT |
| PTPN11EXON04_C_2_11.A | ACACTGACGACATGGTTCTACATCAACTGGAGATTACCTGACAGCGAATC    | PTPN11EXON04_C_2_11.B | TACGGTAGCAGAGACTTGGTCTAGCAGAGAAATTATTAAGTAAAAAGGAAA  |
| PTPN11EXON04_C_3_12.A | ACACTGACGACATGGTTCTACAGTCTCAAATAAATAAATAAATAAATAAATA  | PTPN11EXON04_C_3_12.B | TACGGTAGCAGAGACTTGGTCTGACGGCAAGTCTAAAGTGACCCATGT     |
| PTPN11EXON04_W_1_13.A | ACACTGACGACATGGTTCTACAAAATCTTTTTTATTTTTAAAAAAGTTAG    | PTPN11EXON04_W_1_13.B | TACGGTAGCAGAGACTTGGTCTTGCTCTCCCTTTGTCTATCACCAAGTG    |
| PTPN11EXON04_W_2_14.A | ACACTGACGACATGGTTCTACAGAGCCACCTGGAGATTTTGTCTTCTGT     | PTPN11EXON04_W_2_14.B | TACGGTAGCAGAGACTTGGTCTGGTGTCTGTCTTCTGTCAGCAGAAAAATCA |
| PTPN11EXON09_C_1_15.A | ACACTGACGACATGGTTCTACAGATGTTTTATATCTATTTTTGTTTTGTT    | PTPN11EXON09_C_1_15.B | TACGGTAGCAGAGACTTGGTCTAATCTTAAAGAAGTAAATGCTGATCCAGG  |
| PTPN11EXON09_C_2_16.A | ACACTGACGACATGGTTCTACAGCTAAGGCCTCCGATGTGTAACAAGA      | PTPN11EXON09_C_2_16.B | TACGGTAGCAGAGACTTGGTCTTACAGCCGAAAAGAGGGTCAAAGGCA     |
| PTPN11EXON09_W_1_17.A | ACACTGACGACATGGTTCTACAGTAATAATATTGACTTTTCTTTCTTCCAG   | PTPN11EXON09_W_1_17.B | TACGGTAGCAGAGACTTGGTCTAGGAATCAAATCTCCAAGAGTGACTATTA  |
| PTPN11EXON10_C_1_18.A | ACACTGACGACATGGTTCTACACAAAGCTTACCATGATGATATTTGCATTGA  | PTPN11EXON10_C_1_18.B | TACGGTAGCAGAGACTTGGTCTACTTGGACTAGGCTGGGGAGTAECTGA    |
| PTPN11EXON10_C_2_19.A | ACACTGACGACATGGTTCTACACAGGCTAGAAATTTAGGAAGAAAATCCTC   | PTPN11EXON10_C_2_19.B | TACGGTAGCAGAGACTTGGTCTGTGATCCCAATGAGCCTGTTTCAGATTACA |
| PTPN11EXON10_C_3_20.A | ACACTGACGACATGGTTCTACATCACTCGGGAGTTTTCTTGGAAACCA      | PTPN11EXON10_C_3_20.B | TACGGTAGCAGAGACTTGGTCTCATGTCTGAAAGTAACTTTAAGGTGTTT   |
| PTPN11EXON10_C_4_21.A | ACACTGACGACATGGTTCTACAATTTATTCAATTCCTAAACATGGCCAATCT  | PTPN11EXON10_C_4_21.B | TACGGTAGCAGAGACTTGGTCTGCCTGCAAAAACACGGTGAATGACTTTTG  |
| PTPN11EXON10_W_1_22.A | ACACTGACGACATGGTTCTACATTATGTGACCGTGGTCTCTTTTCTTCTAG   | PTPN11EXON10_W_1_22.B | TACGGTAGCAGAGACTTGGTCTGGAAGGATTTAAATACAAAAATAGGCTAG  |
| PTPN11EXON10_W_2_23.A | ACACTGACGACATGGTTCTACACTTTTACAGTGTTTTCTGACCATACATTT   | PTPN11EXON10_W_2_23.B | TACGGTAGCAGAGACTTGGTCTAGCCTTGTGTGGCAATGTAACCTTTTTGG  |
| PTPN11EXON10_W_3_24.A | ACACTGACGACATGGTTCTACAAAATTTGAAACCAAGTGCAACAATTCAAAGC | PTPN11EXON10_W_3_24.B | TACGGTAGCAGAGACTTGGTCTCAGAAAAGAAGTTTCTGTGATTTACCTTTC |
| PTPN11EXON10_W_4_25.A | ACACTGACGACATGGTTCTACATTGTCATGACAACGAAAGAAGTGAGAGAG   | PTPN11EXON10_W_4_25.B | TACGGTAGCAGAGACTTGGTCTCATAATCAAATTTCTCCTAGTCCCTTTTTT |
| PTPN11EXON12_C_1_26.A | ACACTGACGACATGGTTCTACAATGAGCGGCGCTTTCTTTGACGTT        | PTPN11EXON12_C_1_26.B | TACGGTAGCAGAGACTTGGTCTAAGCAAGACTTGAACATTTGTTTGTGCTT  |
| PTPN11EXON12_C_2_27.A | ACACTGACGACATGGTTCTACAATGAGTAACGGCAAGACCCTGAATTCCTAC  | PTPN11EXON12_C_2_27.B | TACGGTAGCAGAGACTTGGTCTTATGCTCTAAAAGAATATGGCGTCATGCGT |
| PTPN11EXON12_W_1_28.A | ACACTGACGACATGGTTCTACATTAACCTTTCTTTTTCTGATCTCTTCCAG   | PTPN11EXON12_W_1_28.B | TACGGTAGCAGAGACTTGGTCTATACGACAATATACTTACTTGTCCAACCTT |
| PTPN11EXON12_W_2_29.A | ACACTGACGACATGGTTCTACAGACTATACGCTAAGAGAACTTAAACTTTCA  | PTPN11EXON12_W_2_29.B | TACGGTAGCAGAGACTTGGTCTAGGAAGCTAATAAATGGCTACTGAATCAAT |
| PTPN11EXON13_C_1_30.A | ACACTGACGACATGGTTCTACAGAAGTCCAGCACGCCCCAGG            | PTPN11EXON13_C_1_30.B | TACGGTAGCAGAGACTTGGTCTCCATTGGATTAGGAAAGCTTAGAACCCGGG |
| PTPN11EXON13_C_2_31.A | ACACTGACGACATGGTTCTACAGGGCGCTAGGAGACAGGGACAG          | PTPN11EXON13_C_2_31.B | TACGGTAGCAGAGACTTGGTCTCACTTCCGACCTGGCCGGACC          |
| PTPN11EXON13_W_1_32.A | ACACTGACGACATGGTTCTACACTTTCTGTTTTCTTGCTCTACTCCAG      | PTPN11EXON13_W_1_32.B | TACGGTAGCAGAGACTTGGTCTGTGCACCACGACCCGCCCTG           |
| PTPN11EXON13_W_2_33.A | ACACTGACGACATGGTTCTACACTGGAGGAGGTGACCATAAGCAGG        | PTPN11EXON13_W_2_33.B | TACGGTAGCAGAGACTTGGTCTCAGATATTAATTTCTTCTACAGTTAAAGA  |
| PTPN11EXON14_C_1_34.A | ACACTGACGACATGGTTCTACATCTGCCACCAGATGACCCACC           | PTPN11EXON14_C_1_34.B | TACGGTAGCAGAGACTTGGTCTTGTGTTCTGTTGATTAATGGCTTGGTTT   |
| PTPN11EXON14_C_2_35.A | ACACTGACGACATGGTTCTACACAGACACACTGAAGTCTTCCAGCCAGA     | PTPN11EXON14_C_2_35.B | TACGGTAGCAGAGACTTGGTCTGTGATTGATATTCTTATTGACATCATCAG  |
| PTPN11EXON14_W_1_36.A | ACACTGACGACATGGTTCTACATGTCCCTGCTTTTGTCTTCTGCCC        | PTPN11EXON14_W_1_36.B | TACGGTAGCAGAGACTTGGTCTTCCCGACTGTTTCTGTGAGCACT        |
| PTPN11EXON15_C_1_37.A | ACACTGACGACATGGTTCTACAATCGGTAAGTGTCTTCTGTCTGGACC      | PTPN11EXON15_C_1_37.B | TACGGTAGCAGAGACTTGGTCTTGTCTCTGAGTCCACTAAAAGTTGTGCAT  |
| PTPN11EXON15_C_2_38.A | ACACTGACGACATGGTTCTACAGTATCCAAGAGGCCTAGCAAGAGAATGAGA  | PTPN11EXON15_C_2_38.B | TACGGTAGCAGAGACTTGGTCTCATCCAGATGGTGGGCTCTCAGA        |
| PTPN11EXON15_W_1_39.A | ACACTGACGACATGGTTCTACATCTTTATTCTTCTGATGTTTCTTCTGATG   | PTPN11EXON15_W_1_39.B | TACGGTAGCAGAGACTTGGTCTGCTCTTCTTCAATCCTGCGCTGTAGTG    |

|                       |                                                       |                       |                                                      |
|-----------------------|-------------------------------------------------------|-----------------------|------------------------------------------------------|
| PTPN11EXON15_W_2_40.A | ACACTGACGACATGGTTCTACATTATCTATATGGCGGTCCAGCATTATATTG  | PTPN11EXON15_W_2_40.B | TACGGTAGCAGAGACTTGGTCTTCCCATTCCGAAATCAAACAGTTGTCTATC |
| SETD2EXON1_C_1_41.A   | ACACTGACGACATGGTTCTACACCCGCGGAGCTGATACTTACTCAGGG      | SETD2EXON1_C_1_41.B   | TACGGTAGCAGAGACTTGGTCTGCGGTGCGACCTGCGGCCTC           |
| SETD2EXON1_C_2_40.A   | ACACTGACGACATGGTTCTACATCCGACACCGACCGCGCGA             | SETD2EXON1_C_2_40.B   | TACGGTAGCAGAGACTTGGTCTAAGATGGGGATTCTACGACCCGGA       |
| SETD2EXON1_W_1_39.A   | ACACTGACGACATGGTTCTACAGGCTCGCTCGCCGCTCCA              | SETD2EXON1_W_1_39.B   | TACGGTAGCAGAGACTTGGTCTGCCACCCGTCAGGACGCGCC           |
| SETD2EXON10_C_1_48.A  | ACACTGACGACATGGTTCTACACCTCTGCTGCTCTGATGCTGACT         | SETD2EXON10_C_1_48.B  | TACGGTAGCAGAGACTTGGTCTTAGACTGGTATGACTTTTGTGTATTGC    |
| SETD2EXON10_C_2_47.A  | ACACTGACGACATGGTTCTACATGACTTTATAACCTTCAATCAGAAAAGCCA  | SETD2EXON10_C_2_47.B  | TACGGTAGCAGAGACTTGGTCTAGCCAATTGCCGGGGTACCTGG         |
| SETD2EXON10_W_1_46.A  | ACACTGACGACATGGTTCTACAGCTGACTTCTTCTATGCTCTTGAACAG     | SETD2EXON10_W_1_46.B  | TACGGTAGCAGAGACTTGGTCTTGAAGAAAATGCAAACCTACTGAATCC    |
| SETD2EXON10_W_2_45.A  | ACACTGACGACATGGTTCTACAGAAAATGAAGAAGGAACGATCTCGTAAGAA  | SETD2EXON10_W_2_45.B  | TACGGTAGCAGAGACTTGGTCTATTGCATCTCTTTCTGGTAACACTCATC   |
| SETD2EXON11_C_1_44.A  | ACACTGACGACATGGTTCTACATCTAACCTTAGCCGGGATAAGCTGAGCA    | SETD2EXON11_C_1_44.B  | TACGGTAGCAGAGACTTGGTCTAATTGATAAGGTTGAGCAACTTTTGGGTT  |
| SETD2EXON11_C_2_43.A  | ACACTGACGACATGGTTCTACATCCTTCTTATTCTCTTCTTCTTCTTCTT    | SETD2EXON11_C_2_43.B  | TACGGTAGCAGAGACTTGGTCTAATGGTGAGGGTCTCTGATAAAAACCAG   |
| SETD2EXON11_W_1_42.A  | ACACTGACGACATGGTTCTACAATAAAAAGGATTTTTATTGCTGTGGTAG    | SETD2EXON11_W_1_42.B  | TACGGTAGCAGAGACTTGGTCTATAAAGTGTCCACTGTATGAGTCCAG     |
| SETD2EXON11_W_2_41.A  | ACACTGACGACATGGTTCTACAATTGAAACTTTGGAGCAGAAACTTACCTGT  | SETD2EXON11_W_2_41.B  | TACGGTAGCAGAGACTTGGTCTAACAAACAAACAAATAAATAAATAA      |
| SETD2EXON12_C_1_40.A  | ACACTGACGACATGGTTCTACAGCCGTCACCTAGCTCTGCCATCC         | SETD2EXON12_C_1_40.B  | TACGGTAGCAGAGACTTGGTCTAACGTATACATGAACTCTCTCGGGCTCT   |
| SETD2EXON12_C_2_39.A  | ACACTGACGACATGGTTCTACAAATTCATAATTACTGATATTATCACATATC  | SETD2EXON12_C_2_39.B  | TACGGTAGCAGAGACTTGGTCTTTTCTGGAACGTCATGGGCTGCTTTGT    |
| SETD2EXON12_W_1_38.A  | ACACTGACGACATGGTTCTACACTGCATCGTGTCTCCCTCCCCC          | SETD2EXON12_W_1_38.B  | TACGGTAGCAGAGACTTGGTCTAAGAAACAAGCAAGTAAATGTGAACGAC   |
| SETD2EXON13_C_1_37.A  | ACACTGACGACATGGTTCTACACTGAGACCAGCGTTGAATAATTGGAAGTAC  | SETD2EXON13_C_1_37.B  | TACGGTAGCAGAGACTTGGTCTAGCCTGGGTGACAGAGTGAGACTCT      |
| SETD2EXON13_C_2_36.A  | ACACTGACGACATGGTTCTACAGTCAGCTTCTGTGCTCAGCTTGGTG       | SETD2EXON13_C_2_36.B  | TACGGTAGCAGAGACTTGGTCTCTACTAAAAATATGTTGGAGAAAGCAAA   |
| SETD2EXON13_C_3_35.A  | ACACTGACGACATGGTTCTACAAGATCCTCTTGGCATCTTGCCTTCTAG     | SETD2EXON13_C_3_35.B  | TACGGTAGCAGAGACTTGGTCTCGTGTCTATACCACTCAACACACC       |
| SETD2EXON13_C_4_34.A  | ACACTGACGACATGGTTCTACATAGCTTACTAGCTTCTATGTTGGTTTCACT  | SETD2EXON13_C_4_34.B  | TACGGTAGCAGAGACTTGGTCTGACAGTGAATCTCTGATGCAACCACTG    |
| SETD2EXON13_C_5_33.A  | ACACTGACGACATGGTTCTACAATCAGACACACCTCTCTTCTTCTTGGG     | SETD2EXON13_C_5_33.B  | TACGGTAGCAGAGACTTGGTCTCCACAACAGCTGCCTGAATGCAAAGT     |
| SETD2EXON13_C_6_32.A  | ACACTGACGACATGGTTCTACATGAAATGAACAAAAGATGCTTCTTACCTT   | SETD2EXON13_C_6_32.B  | TACGGTAGCAGAGACTTGGTCTAGAAGAACCTATAATGAAGAAACACCA    |
| SETD2EXON13_C_7_31.A  | ACACTGACGACATGGTTCTACAAGACACTTATAAATAAAACAGTAAGAGAGA  | SETD2EXON13_C_7_31.B  | TACGGTAGCAGAGACTTGGTCTACCAAACCTCTGGACAGTTGGAAAGACC   |
| SETD2EXON13_W_1_30.A  | ACACTGACGACATGGTTCTACAGTGATGTAATTTTTTTTATGTTAATCAG    | SETD2EXON13_W_1_30.B  | TACGGTAGCAGAGACTTGGTCTCGATGTATTTCTACTAGAATACCCATCTCC |
| SETD2EXON13_W_2_29.A  | ACACTGACGACATGGTTCTACAACACTAAGACTGTGTCCCTCCGTTGAGT    | SETD2EXON13_W_2_29.B  | TACGGTAGCAGAGACTTGGTCTCATGTATTTTCACTTATAATTTTCACTCT  |
| SETD2EXON13_W_3_28.A  | ACACTGACGACATGGTTCTACAACAGACTCCCAAGAAACTAATGTTTCGC    | SETD2EXON13_W_3_28.B  | TACGGTAGCAGAGACTTGGTCTGAGTAGCTGTTGTGACTGCAATCTTCTCT  |
| SETD2EXON13_W_4_27.A  | ACACTGACGACATGGTTCTACAGATCAATTAGAAAATGTCCTGTAGAGGAA   | SETD2EXON13_W_4_27.B  | TACGGTAGCAGAGACTTGGTCTTTTGTGCGGTTGCTCTTTTGGGC        |
| SETD2EXON13_W_5_26.A  | ACACTGACGACATGGTTCTACACCTACATCTGAACCAGAAGCTGACGCT     | SETD2EXON13_W_5_26.B  | TACGGTAGCAGAGACTTGGTCTGGCCAATCACTTATATCCACTGTTTATC   |
| SETD2EXON13_W_6_25.A  | ACACTGACGACATGGTTCTACAGTGGAGAGTGAAGGAGCCAAGAACAGC     | SETD2EXON13_W_6_25.B  | TACGGTAGCAGAGACTTGGTCTTAAAAAAGTAGTTAATTTTGTCTAGGTT   |
| SETD2EXON14_C_1_24.A  | ACACTGACGACATGGTTCTACAATTTGTAAGCCATCAACACAGAGTATCTC   | SETD2EXON14_C_1_24.B  | TACGGTAGCAGAGACTTGGTCTTTCTTATTGTCATGTGAAAACAGTCAGTT  |
| SETD2EXON14_W_1_23.A  | ACACTGACGACATGGTTCTACAATAACCTCCCTCTGGTTTATTTTTGCG     | SETD2EXON14_W_1_23.B  | TACGGTAGCAGAGACTTGGTCTAGTTTCAAAAACAAAACGCTTAAGTCTT   |
| SETD2EXON15_C_1_22.A  | ACACTGACGACATGGTTCTACATGTCTGGGCTCTCTCTCTTCTTACCTATTAG | SETD2EXON15_C_1_22.B  | TACGGTAGCAGAGACTTGGTCTTATACAGTTGATACATTGTATGATGGAG   |
| SETD2EXON15_C_2_21.A  | ACACTGACGACATGGTTCTACAAAAAAACTCACACAGGCCACTTACCTGT    | SETD2EXON15_C_2_21.B  | TACGGTAGCAGAGACTTGGTCTCAGAGATCAAACACCTGCCCCGAAG      |
| SETD2EXON15_C_3_20.A  | ACACTGACGACATGGTTCTACATCAGTAAAGTTGATACTCACTCATCAAAA   | SETD2EXON15_C_3_20.B  | TACGGTAGCAGAGACTTGGTCTCTATGAGCGGGGAACAAAAGGCC        |
| SETD2EXON15_W_1_19.A  | ACACTGACGACATGGTTCTACAAAAACAAACAAACCCCTTTTCCCTTAG     | SETD2EXON15_W_1_19.B  | TACGGTAGCAGAGACTTGGTCTCAGAAGAGGGTGGTGAAGGGAGCT       |
| SETD2EXON15_W_2_18.A  | ACACTGACGACATGGTTCTACAAGCAAACCTCAAATAAAGAGAAAAGGAAAC  | SETD2EXON15_W_2_18.B  | TACGGTAGCAGAGACTTGGTCTTCAACATCAGAAGTATATGACTTGGGTAC  |
| SETD2EXON16_C_1_17.A  | ACACTGACGACATGGTTCTACATCTTGCTCAACAACCTCCGGCGTTTC      | SETD2EXON16_C_1_17.B  | TACGGTAGCAGAGACTTGGTCTTTAGTCATGAGTGACATAACTTATTAG    |
| SETD2EXON16_C_2_16.A  | ACACTGACGACATGGTTCTACAGGTAACAGCAAAGGGATGATGCG         | SETD2EXON16_C_2_16.B  | TACGGTAGCAGAGACTTGGTCTACGAATTAAGACCGCAATAAAGTTCTAC   |
| SETD2EXON16_C_3_15.A  | ACACTGACGACATGGTTCTACAGGCTGAGCATGATCATAAGGAGCAGGA     | SETD2EXON16_C_3_15.B  | TACGGTAGCAGAGACTTGGTCTACCACTGCCATGACTCTCTTGGTTATAA   |
| SETD2EXON16_C_4_14.A  | ACACTGACGACATGGTTCTACAACCTACCATCACTCTGGGCCACATACT     | SETD2EXON16_C_4_14.B  | TACGGTAGCAGAGACTTGGTCTCTGCCACACCCAGCATGGA            |

|                      |                                                      |                      |                                                       |
|----------------------|------------------------------------------------------|----------------------|-------------------------------------------------------|
| SETD2EXON16_C_5_13.A | ACACTGACGACATGGTTCTACAGGAGAGTACTGCTGTACTGACAG        | SETD2EXON16_C_5_13.B | TACGGTAGCAGAGACTTGGTCTTGTGGCAGCTCCTGTGGAAGTTCC        |
| SETD2EXON16_C_6_12.A | ACACTGACGACATGGTTCTACAAAAGTTTCAGAATTAGTTACCTGTACAATT | SETD2EXON16_C_6_12.B | TACGGTAGCAGAGACTTGGTCTGAATTATAGTGTGGGATTCAAACCAACA    |
| SETD2EXON16_C_7_11.A | ACACTGACGACATGGTTCTACACACAATAGATAACCAATACATATAAAGTTG | SETD2EXON16_C_7_11.B | TACGGTAGCAGAGACTTGGTCTGACATCACCTTATTACAGACAACCTCCACC  |
| SETD2EXON16_W_1_10.A | ACACTGACGACATGGTTCTACAAACTTTTTGTGGTCTTATTTTCTTCTAG   | SETD2EXON16_W_1_10.B | TACGGTAGCAGAGACTTGGTCTGATGTCAATCCAGGTTCTGCATCTGTTGC   |
| SETD2EXON16_W_2_9.A  | ACACTGACGACATGGTTCTACAGGTGGCTCAACGGGAGGCTCA          | SETD2EXON16_W_2_9.B  | TACGGTAGCAGAGACTTGGTCTAGCACCTTCCAGCATTAGGGTTGCT       |
| SETD2EXON16_W_3_8.A  | ACACTGACGACATGGTTCTACAAACAGGTTATCCATGCAGGCCTATG      | SETD2EXON16_W_3_8.B  | TACGGTAGCAGAGACTTGGTCTTGTGGCACCAGTGGTACTGGTGG         |
| SETD2EXON16_W_4_7.A  | ACACTGACGACATGGTTCTACACTTGGTGGGACATTCTACAGAACCCTTT   | SETD2EXON16_W_4_7.B  | TACGGTAGCAGAGACTTGGTCTTGTCCCTGAAGTGGGCCGGG            |
| SETD2EXON16_W_5_6.A  | ACACTGACGACATGGTTCTACAACACCAAGACTCCAGCGTTGCTGT       | SETD2EXON16_W_5_6.B  | TACGGTAGCAGAGACTTGGTCTACACCATAGACTGTTGGACATGTCTGCTCT  |
| SETD2EXON16_W_6_5.A  | ACACTGACGACATGGTTCTACATGCACAGTCTCAAGCAACCATATATTATCA | SETD2EXON16_W_6_5.B  | TACGGTAGCAGAGACTTGGTCTTCTCCCTATACCAGATTTAACTAACA      |
| SETD2EXON17_C_1_4.A  | ACACTGACGACATGGTTCTACATGCTGCGGCTGGCTGTACCA           | SETD2EXON17_C_1_4.B  | TACGGTAGCAGAGACTTGGTCTATATCTTTAAGATTGTCCAACCTGGAAGT   |
| SETD2EXON17_C_2_3.A  | ACACTGACGACATGGTTCTACAATCCAAACCAAAAAGAAAACCTTCCAAAGA | SETD2EXON17_C_2_3.B  | TACGGTAGCAGAGACTTGGTCTCAGGGGCAACAGATTTTACAGCTCATC     |
| SETD2EXON17_W_1_2.A  | ACACTGACGACATGGTTCTACAAATTTATTGATTTCTTATTTTATCTTTTAG | SETD2EXON17_W_1_2.B  | TACGGTAGCAGAGACTTGGTCTTGAACATTTCTTACTGGCTGCAAGGGC     |
| SETD2EXON17_W_2_1.A  | ACACTGACGACATGGTTCTACAGTGACTACAATAGTTGCACCAGGGCAGC   | SETD2EXON17_W_2_1.B  | TACGGTAGCAGAGACTTGGTCTTAAAAATAAAAATAAACAAGAACACGTGAA  |
| SETD2EXON18_C_1_48.A | ACACTGACGACATGGTTCTACACTTCCAGTTGGGAGGTAAGACAATGGTTTT | SETD2EXON18_C_1_48.B | TACGGTAGCAGAGACTTGGTCTATTTTTACATATTTAAGTGGGCTATTTTGT  |
| SETD2EXON18_C_2_47.A | ACACTGACGACATGGTTCTACATCCCTTATAGTGGCAACTTCTTTGATTAA  | SETD2EXON18_C_2_47.B | TACGGTAGCAGAGACTTGGTCTGATCTGCCGCCCCCTCTCC             |
| SETD2EXON18_W_1_46.A | ACACTGACGACATGGTTCTACATGATCAAAAATGTGTGTGTTTTCTTTGTAG | SETD2EXON18_W_1_46.B | TACGGTAGCAGAGACTTGGTCTCTCTCTTACCTGTGATCACATGGTAGTA    |
| SETD2EXON18_W_2_45.A | ACACTGACGACATGGTTCTACAACAGCTCGAGATCCAGAAGGGAAGATTTAT | SETD2EXON18_W_2_45.B | TACGGTAGCAGAGACTTGGTCTAATCCAGCAGCCTTCAAGCACAGTGA      |
| SETD2EXON19_C_1_44.A | ACACTGACGACATGGTTCTACAGTTGGAGTCCCAGGTCATCTCAGC       | SETD2EXON19_C_1_44.B | TACGGTAGCAGAGACTTGGTCTGTATTTTATGTATGTATGAGCAGTGTATG   |
| SETD2EXON19_C_2_43.A | ACACTGACGACATGGTTCTACAATTTTTCAGAATAAAGAAAAAGAATCCCA  | SETD2EXON19_C_2_43.B | TACGGTAGCAGAGACTTGGTCTAAGCCAGGAGATGATGCCAGCC          |
| SETD2EXON19_W_1_42.A | ACACTGACGACATGGTTCTACAGACAGCATGGCTGTTTTGTCTCTTTCTAG  | SETD2EXON19_W_1_42.B | TACGGTAGCAGAGACTTGGTCTCAAATGATCAGGAAATACATGTGTAAGCC   |
| SETD2EXON2_C_1_16.A  | ACACTGACGACATGGTTCTACATTTCCAGTTAAACTTTCTTTTGACCAAAT  | SETD2EXON2_C_1_16.B  | TACGGTAGCAGAGACTTGGTCTTGATCCACCCACCTGGGCTTCC          |
| SETD2EXON2_W_1_15.A  | ACACTGACGACATGGTTCTACATGGTCAGTTCTTTTATTGTTAGTATTGAAT | SETD2EXON2_W_1_15.B  | TACGGTAGCAGAGACTTGGTCTTAATATAGAATCTGACTATCTGACTGCTT   |
| SETD2EXON20_C_1_38.A | ACACTGACGACATGGTTCTACAAAACCTTACCTCTTTTCTGAATACTTCTTT | SETD2EXON20_C_1_38.B | TACGGTAGCAGAGACTTGGTCTAGGGGAAAGAAAGGAGGGTTCTGGGA      |
| SETD2EXON20_C_2_37.A | ACACTGACGACATGGTTCTACACACACAAGGAACACTTGTGTTCTCTGC    | SETD2EXON20_C_2_37.B | TACGGTAGCAGAGACTTGGTCTGACACCTCCAGTGAACCTAGCAAAGAAAAGC |
| SETD2EXON20_W_1_36.A | ACACTGACGACATGGTTCTACAGCACCAGTGTGTTTTCTCTCCATTTTCTAG | SETD2EXON20_W_1_36.B | TACGGTAGCAGAGACTTGGTCTTAGGACAAGAAATGAAAGGGTTCAGATTTA  |
| SETD2EXON21_C_1_35.A | ACACTGACGACATGGTTCTACAATGTTTAAAGTCTTCAGTTGTGGTAATTCT | SETD2EXON21_C_1_35.B | TACGGTAGCAGAGACTTGGTCTTACTCACTACCTTTTCTAGTATTCTCTCA   |
| SETD2EXON21_C_2_34.A | ACACTGACGACATGGTTCTACAATCTGACAAGAAAAAATACTTTCTA      | SETD2EXON21_C_2_34.B | TACGGTAGCAGAGACTTGGTCTCTTACCAGAACTGACTGCAAAGTGG       |
| SETD2EXON21_W_1_33.A | ACACTGACGACATGGTTCTACAAGCAACGTGTTCTTTTCTCTGCCTGC     | SETD2EXON21_W_1_33.B | TACGGTAGCAGAGACTTGGTCTGTTGCCAGAACATTGCCTGGTGG         |
| SETD2EXON22_C_1_32.A | ACACTGACGACATGGTTCTACACTTGGTTTTGTGTTTCACTTCTCATTGCA  | SETD2EXON22_C_1_32.B | TACGGTAGCAGAGACTTGGTCTCAGCAGGCTGGATTACCACCCCT         |
| SETD2EXON22_C_2_31.A | ACACTGACGACATGGTTCTACATAGAGTCTGTCTTACCTGACCACCCATCC  | SETD2EXON22_C_2_31.B | TACGGTAGCAGAGACTTGGTCTAAGTACTGTAAGAACTCTGAGGACCTGGAG  |
| SETD2EXON22_C_3_30.A | ACACTGACGACATGGTTCTACAGAGTTCATTTTTGTGGCCTCAGTTGACAT  | SETD2EXON22_C_3_30.B | TACGGTAGCAGAGACTTGGTCTGAATTAGAGTACTGTTGGGCCAGGGT      |
| SETD2EXON22_C_4_29.A | ACACTGACGACATGGTTCTACAGAGAAGACCCAGGTTTAAAGAGTGGAGTCA | SETD2EXON22_C_4_29.B | TACGGTAGCAGAGACTTGGTCTTACATCACCTGGGGAATTCAACCTGC      |
| SETD2EXON22_C_5_28.A | ACACTGACGACATGGTTCTACAAGGAAAAACAATATTTTCAATATATTC    | SETD2EXON22_C_5_28.B | TACGGTAGCAGAGACTTGGTCTGCAAGGGCTTAGAAAAGACCTGGC        |
| SETD2EXON22_C_6_27.A | ACACTGACGACATGGTTCTACATTAGAATATTTACATGATAACAAATTAAC  | SETD2EXON22_C_6_27.B | TACGGTAGCAGAGACTTGGTCTATGATCTGTATTATATTTAATGTATATGT   |
| SETD2EXON22_C_7_26.A | ACACTGACGACATGGTTCTACATGATTTTATTTTTTACATAAAAAGTTTCA  | SETD2EXON22_C_7_26.B | TACGGTAGCAGAGACTTGGTCTTGTAAAGACAGTTAAGTTCTCTGCAAG     |
| SETD2EXON22_C_8_25.A | ACACTGACGACATGGTTCTACAGATTAACCTTGGACTTACACACCTAAGGC  | SETD2EXON22_C_8_25.B | TACGGTAGCAGAGACTTGGTCTTAAATCACTTACTTTTCAATTTTTA       |
| SETD2EXON22_W_1_24.A | ACACTGACGACATGGTTCTACACTGTGGTCTCTCTCTGTGCCCTG        | SETD2EXON22_W_1_24.B | TACGGTAGCAGAGACTTGGTCTAGTGTCTCTTTGGGTTTGTAAACAGCCC    |
| SETD2EXON22_W_2_23.A | ACACTGACGACATGGTTCTACAGAGTACATTAAGAAGTACATGCAGAAGTTT | SETD2EXON22_W_2_23.B | TACGGTAGCAGAGACTTGGTCTTACATCAGTAGCACAGTGTGACAGGG      |
| SETD2EXON22_W_3_22.A | ACACTGACGACATGGTTCTACAGGGAGAGAAATCCTGTGGGCCTTT       | SETD2EXON22_W_3_22.B | TACGGTAGCAGAGACTTGGTCTACCTCTGATGGCTTCAACCACATGCC      |

|                      |                                                       |                      |                                                       |
|----------------------|-------------------------------------------------------|----------------------|-------------------------------------------------------|
| SETD2EXON22_W_4_21.A | ACACTGACGACATGGTTCTACACATCTACAAGTGATTACCTAGTTGTGAGCT  | SETD2EXON22_W_4_21.B | TACGGTAGCAGAGACTTGGTCTCAGGGTAAAGGGTTGTGGGTGGGG        |
| SETD2EXON22_W_5_20.A | ACACTGACGACATGGTTCTACACTTGGCGGTGCTGTGAGCGC            | SETD2EXON22_W_5_20.B | TACGGTAGCAGAGACTTGGTCTAGTCTTCTGTGATCTAGCATGTAGAGGC    |
| SETD2EXON22_W_6_19.A | ACACTGACGACATGGTTCTACAGGTTTTGTTGGTTTTGTTTTGCTTTTA     | SETD2EXON22_W_6_19.B | TACGGTAGCAGAGACTTGGTCTGCAGTAAATCAATCTTATCAACATAGCACAA |
| SETD2EXON22_W_7_18.A | ACACTGACGACATGGTTCTACAAGCAGGCTGCCTTGTGGTTTTGG         | SETD2EXON22_W_7_18.B | TACGGTAGCAGAGACTTGGTCTTCATTACACACAAATATGCTTGATTAACCT  |
| SETD2EXON22_W_8_17.A | ACACTGACGACATGGTTCTACAATTAAGAAGTGGCATGTGTGTTCCCTAA    | SETD2EXON22_W_8_17.B | TACGGTAGCAGAGACTTGGTCTCCAGTCATAGTAGGACCTGTGGAGAATGA   |
| SETD2EXON3_C_1_14.A  | ACACTGACGACATGGTTCTACATTGCCAGGCTGGAGCAAGTACA          | SETD2EXON3_C_1_14.B  | TACGGTAGCAGAGACTTGGTCTGGGAAATTTACACATGACCTGATGTGAG    |
| SETD2EXON3_W_1_13.A  | ACACTGACGACATGGTTCTACACATGGTGGCATGCACCTGTAGTCCC       | SETD2EXON3_W_1_13.B  | TACGGTAGCAGAGACTTGGTCTATAAACTGTGTTGATGCCTGTGTTTTGTT   |
| SETD2EXON4_C_1_2.A   | ACACTGACGACATGGTTCTACAGTGCCCTTGGGCAAAAATCGACTAGAAG    | SETD2EXON4_C_1_2.B   | TACGGTAGCAGAGACTTGGTCTTCATTCTCCAGTAAACATTTAACTGTG     |
| SETD2EXON4_C_10_12.A | ACACTGACGACATGGTTCTACAATAGGATAAATTAGTTCTAGAGCCTCTCTC  | SETD2EXON4_C_10_12.B | TACGGTAGCAGAGACTTGGTCTAGTGAGGATCTAGGGAAACCTTACGATCT   |
| SETD2EXON4_C_11_11.A | ACACTGACGACATGGTTCTACAAGAAGTCTCTCGTCTGTATCTGTGTA      | SETD2EXON4_C_11_11.B | TACGGTAGCAGAGACTTGGTCTCGACGGCGGAGCAGATCTCACT          |
| SETD2EXON4_C_12_10.A | ACACTGACGACATGGTTCTACAGTCTCAGTTTTACAGTCCCGATCAGATTT   | SETD2EXON4_C_12_10.B | TACGGTAGCAGAGACTTGGTCTTACGAGAGAGGACGCGCTATTCTCGG      |
| SETD2EXON4_C_13_9.A  | ACACTGACGACATGGTTCTACAGAATCCCAGTTTATTAGGGGGAGAACAACA  | SETD2EXON4_C_13_9.B  | TACGGTAGCAGAGACTTGGTCTTACAGAGACCTAAGGACATCATCTATTCT   |
| SETD2EXON4_C_14_8.A  | ACACTGACGACATGGTTCTACAATTAATTCTGTACAACAGAAAAGAAATTTT  | SETD2EXON4_C_14_8.B  | TACGGTAGCAGAGACTTGGTCTAGGACTTCAGAAAATGAAGCAATTAAGA    |
| SETD2EXON4_C_15_7.A  | ACACTGACGACATGGTTCTACAATTTGATGGAGCTGGAGACCCAGCC       | SETD2EXON4_C_15_7.B  | TACGGTAGCAGAGACTTGGTCTTCAAACCTATACCAAGTCTGATAAATTT    |
| SETD2EXON4_C_16_6.A  | ACACTGACGACATGGTTCTACACTTCACTTTAGATAAAGAGTCTAATTCCTT  | SETD2EXON4_C_16_6.B  | TACGGTAGCAGAGACTTGGTCTTAAAGATGATTAATAAAAATCTGAAAGA    |
| SETD2EXON4_C_17_5.A  | ACACTGACGACATGGTTCTACAATCAGAAGTCATTAACAGCATCAGTTTT    | SETD2EXON4_C_17_5.B  | TACGGTAGCAGAGACTTGGTCTTTATAACACATGATGCCATGATAGTATT    |
| SETD2EXON4_C_18_4.A  | ACACTGACGACATGGTTCTACAATGCAGCATGCAGGTATCATCCAAGTCT    | SETD2EXON4_C_18_4.B  | TACGGTAGCAGAGACTTGGTCTGAATCTGATTTGGCAACATTTGCACTTCT   |
| SETD2EXON4_C_19_3.A  | ACACTGACGACATGGTTCTACAAGTGGTCTTTAACTACTGTTTTGGAATA    | SETD2EXON4_C_19_3.B  | TACGGTAGCAGAGACTTGGTCTGGATTTGAGAATATTAGTAGTGCAAAGAA   |
| SETD2EXON4_C_2_39.A  | ACACTGACGACATGGTTCTACAATCACTTTGCTTTTCACTGCAAGTGCAGT   | SETD2EXON4_C_2_39.B  | TACGGTAGCAGAGACTTGGTCTTTCATCAAAGGACCAATGTTCAAAGGTGTT  |
| SETD2EXON4_C_20_1.A  | ACACTGACGACATGGTTCTACAATCTTCAACTGAAGGCTCAATATTTTC     | SETD2EXON4_C_20_1.B  | TACGGTAGCAGAGACTTGGTCTCATGTCTATGCCAGTTATGACTGTGGAT    |
| SETD2EXON4_C_21_48.A | ACACTGACGACATGGTTCTACAAGTGTACCGATGCTGCTTATATTCTTC     | SETD2EXON4_C_21_48.B | TACGGTAGCAGAGACTTGGTCTAGCAACCTTCTTTGTGTAACCTGGAAGCT   |
| SETD2EXON4_C_22_47.A | ACACTGACGACATGGTTCTACATTTCAAGAGAGTTAGACTGTCCACCTTTAT  | SETD2EXON4_C_22_47.B | TACGGTAGCAGAGACTTGGTCTAATTTGACAGATCACTCAAATTTGCATGT   |
| SETD2EXON4_C_23_46.A | ACACTGACGACATGGTTCTACATGAATCAGGAAGTCACTACTACTTCTAC    | SETD2EXON4_C_23_46.B | TACGGTAGCAGAGACTTGGTCTGCTTCTTCTTCTCAGAGTCTTCCACCAGG   |
| SETD2EXON4_C_24_45.A | ACACTGACGACATGGTTCTACAGATTTCTGGTCTTCTTCTTTTTCAGGCAA   | SETD2EXON4_C_24_45.B | TACGGTAGCAGAGACTTGGTCTTTTTAAAGCATGCAGGGAAAGAAACAATA   |
| SETD2EXON4_C_25_44.A | ACACTGACGACATGGTTCTACAATAATGCATAAGTTACACCATCACTGTCTTC | SETD2EXON4_C_25_44.B | TACGGTAGCAGAGACTTGGTCTCAAGAGGCTCAAGAAGAAGGGAATTCATA   |
| SETD2EXON4_C_26_43.A | ACACTGACGACATGGTTCTACAGCTATCATCCGAATCTGTATCTTCTGAATC  | SETD2EXON4_C_26_43.B | TACGGTAGCAGAGACTTGGTCTTTTTCTTCTGTGATTTGAATTTAACCATG   |
| SETD2EXON4_C_27_42.A | ACACTGACGACATGGTTCTACAGTCAAGATAGTGTCTATAACTTTGACTGCT  | SETD2EXON4_C_27_42.B | TACGGTAGCAGAGACTTGGTCTGGCTCTTCTGAAAGTCAAATGATGAAAGT   |
| SETD2EXON4_C_28_41.A | ACACTGACGACATGGTTCTACACTTCTCTGTTCTTTATGAAGGAAAACCTT   | SETD2EXON4_C_28_41.B | TACGGTAGCAGAGACTTGGTCTATGGAAGAAAACAAGTCTTGTCTTCTCGG   |
| SETD2EXON4_C_29_40.A | ACACTGACGACATGGTTCTACAGTCAAGATTTACATCTGTATGACTTGTACT  | SETD2EXON4_C_29_40.B | TACGGTAGCAGAGACTTGGTCTATAGCAAGTAAAGCTGCTCAAAGTATGAT   |
| SETD2EXON4_C_3_30.A  | ACACTGACGACATGGTTCTACACAATCCACCCTTGACTTTGGTGGGGA      | SETD2EXON4_C_3_30.B  | TACGGTAGCAGAGACTTGGTCTACAAAGAAAACCTTGCAGAATAGGTTTCTC  |
| SETD2EXON4_C_30_38.A | ACACTGACGACATGGTTCTACACTGTTGCCAAGACTTATTTGGGACATCTTC  | SETD2EXON4_C_30_38.B | TACGGTAGCAGAGACTTGGTCTTCTTCTCATCTCAGAGTGTGGGGTTGAT    |
| SETD2EXON4_C_31_37.A | ACACTGACGACATGGTTCTACAACCTAAGTTTCTGAGCTTCTGTATGAGTG   | SETD2EXON4_C_31_37.B | TACGGTAGCAGAGACTTGGTCTGAAGAGCTGCCAATTTATTCTTCTGATTTT  |
| SETD2EXON4_C_32_36.A | ACACTGACGACATGGTTCTACAGTAATCAGTGTCCACCATACTGTTCTGC    | SETD2EXON4_C_32_36.B | TACGGTAGCAGAGACTTGGTCTTCTGTGAGATACCACATGTGGATGGCTTG   |
| SETD2EXON4_C_33_35.A | ACACTGACGACATGGTTCTACACTCCTTCTTCTCACGATCATCTGTTAGGGA  | SETD2EXON4_C_33_35.B | TACGGTAGCAGAGACTTGGTCTGCTTGTGGTGGACACAAGTATCAGAAAA    |
| SETD2EXON4_C_34_34.A | ACACTGACGACATGGTTCTACAGTCTTAATGGAATGCTGCTTATTTTCAAGG  | SETD2EXON4_C_34_34.B | TACGGTAGCAGAGACTTGGTCTTATGATCGAACTCAAGGACAAGTACCAGAT  |
| SETD2EXON4_C_35_33.A | ACACTGACGACATGGTTCTACAACCATCACTTTCAGAATCACTCTATTTTC   | SETD2EXON4_C_35_33.B | TACGGTAGCAGAGACTTGGTCTTTCAGAAAGACAAGGGTCAAGTCAAGC     |
| SETD2EXON4_C_36_32.A | ACACTGACGACATGGTTCTACATCGCTGTGGGTCCTGAAGTCATC         | SETD2EXON4_C_36_32.B | TACGGTAGCAGAGACTTGGTCTGATAGAGGGCTCTTAAAAAAGGAGGCAG    |
| SETD2EXON4_C_37_31.A | ACACTGACGACATGGTTCTACAAAAAGAGTTAAATTTGTCAAACAAGTAT    | SETD2EXON4_C_37_31.B | TACGGTAGCAGAGACTTGGTCTCCAGTTTCAAGTCAAGTGGTGGGC        |
| SETD2EXON4_C_4_29.A  | ACACTGACGACATGGTTCTACACTTCTGATCACTGCTGGTAATGGTCT      | SETD2EXON4_C_4_29.B  | TACGGTAGCAGAGACTTGGTCTATTGGTGATACCTTATCTACTGCAGAAGAA  |

|                      |                                                       |                      |                                                       |
|----------------------|-------------------------------------------------------|----------------------|-------------------------------------------------------|
| SETD2EXON4_C_5_28.A  | ACACTGACGACATGGTTCTACATATTGGTGTATGTGGCAAGGCCACTGG     | SETD2EXON4_C_5_28.B  | TACGGTAGCAGAGACTTGGTCTACCACAGCAGTAGCATCTCCACCTACT     |
| SETD2EXON4_C_6_27.A  | ACACTGACGACATGGTTCTACATATAGTGTCTGCTTAGTATCTGCTTCTAA   | SETD2EXON4_C_6_27.B  | TACGGTAGCAGAGACTTGGTCTACAACACTCTCATCACCAGCACCAGT      |
| SETD2EXON4_C_7_26.A  | ACACTGACGACATGGTTCTACAACCTAATCTAGAACTATCTGGAAATTTCTTC | SETD2EXON4_C_7_26.B  | TACGGTAGCAGAGACTTGGTCTGAACCACCAATTATAATTGTACCAGAATCT  |
| SETD2EXON4_C_8_25.A  | ACACTGACGACATGGTTCTACATAAATCATGTGATCTTTGACTTGAAGAAGT  | SETD2EXON4_C_8_25.B  | TACGGTAGCAGAGACTTGGTCTAAAAAAGAAGATTCCCATATTGGGAAGGAT  |
| SETD2EXON4_C_9_24.A  | ACACTGACGACATGGTTCTACAGCTAAAATATTTATCATCTCTGTCTGTTTT  | SETD2EXON4_C_9_24.B  | TACGGTAGCAGAGACTTGGTCTGGTTCAGAATCTGATGAAGATTCTGTACGG  |
| SETD2EXON4_W_1_13.A  | ACACTGACGACATGGTTCTACAGTAGTAATTGCTTATTTTGTTCATTGTAG   | SETD2EXON4_W_1_13.B  | TACGGTAGCAGAGACTTGGTCTAAGGCTGAAGCTGAATGACACCTTCTGT    |
| SETD2EXON4_W_10_23.A | ACACTGACGACATGGTTCTACATATTTCAAACCTTGAAGAGATACTCGGTAT  | SETD2EXON4_W_10_23.B | TACGGTAGCAGAGACTTGGTCTAGGGGAGCTCTATGGTAGCGACG         |
| SETD2EXON4_W_11_22.A | ACACTGACGACATGGTTCTACATCCAGGTCAGAACGATCTCATTATTATGAC  | SETD2EXON4_W_11_22.B | TACGGTAGCAGAGACTTGGTCTAGAAGAGGAATGAGATGAGGTACGCCTTGA  |
| SETD2EXON4_W_12_21.A | ACACTGACGACATGGTTCTACAGACTCAGAAGAAGAGTATAAGAAGACATAC  | SETD2EXON4_W_12_21.B | TACGGTAGCAGAGACTTGGTCTTTTAGATTCTCTTTCTAGTTTTGAAGAATA  |
| SETD2EXON4_W_13_20.A | ACACTGACGACATGGTTCTACATCTTACTTAGAGATGGAAGAAGAGGCAAG   | SETD2EXON4_W_13_20.B | TACGGTAGCAGAGACTTGGTCTAAGGGTAGATTTATAACGGGAAGCACTACT  |
| SETD2EXON4_W_14_19.A | ACACTGACGACATGGTTCTACACGACGAGGGTCATCATATTCTAAGCATGAC  | SETD2EXON4_W_14_19.B | TACGGTAGCAGAGACTTGGTCTTCTACTACCTTTTGAACAAGGTGTCTGTAA  |
| SETD2EXON4_W_15_18.A | ACACTGACGACATGGTTCTACAGAAGAAATCAAACAGTCTCATTCTTTTAGT  | SETD2EXON4_W_15_18.B | TACGGTAGCAGAGACTTGGTCTTTCGGACTTAAAAATAGGCAATTCATCTAG  |
| SETD2EXON4_W_16_17.A | ACACTGACGACATGGTTCTACAGATTAATGATTACCTACTTTAAAAAAG     | SETD2EXON4_W_16_17.B | TACGGTAGCAGAGACTTGGTCTTGCCCGAGGAGATCCATTTATATTTAATTC  |
| SETD2EXON4_W_17_16.A | ACACTGACGACATGGTTCTACAAGATCAATTAAGAAGTTTTTGTCCATA     | SETD2EXON4_W_17_16.B | TACGGTAGCAGAGACTTGGTCTATTTGATGAAGCATGCATGCTTTGACCAA   |
| SETD2EXON4_W_18_15.A | ACACTGACGACATGGTTCTACAGATAGTGTGACTGGATCGGAATTATCCCT   | SETD2EXON4_W_18_15.B | TACGGTAGCAGAGACTTGGTCTTTTATCTTGGTGTGGTGACACCAGAGGTTT  |
| SETD2EXON4_W_19_14.A | ACACTGACGACATGGTTCTACAAGAAGTCAAGAAAGCCATTTAGAGAAACA   | SETD2EXON4_W_19_14.B | TACGGTAGCAGAGACTTGGTCTATCGTTCAAAGTACAGTATATGTCTGAATC  |
| SETD2EXON4_W_2_2.A   | ACACTGACGACATGGTTCTACAAAAACAAAGTTAATTTGAAGAAGAGGGA    | SETD2EXON4_W_2_2.B   | TACGGTAGCAGAGACTTGGTCTTCCATTTTCTTTTAGGAGTCGAGTCTAC    |
| SETD2EXON4_W_20_12.A | ACACTGACGACATGGTTCTACAGATACGAGGGTTCTTGTCTGCAAAACCAA   | SETD2EXON4_W_20_12.B | TACGGTAGCAGAGACTTGGTCTTCTACTATCACATAACTGGTTTTGATTC    |
| SETD2EXON4_W_21_11.A | ACACTGACGACATGGTTCTACATCTTCAAATAGCTTTATGAATGTGCAATTTG | SETD2EXON4_W_21_11.B | TACGGTAGCAGAGACTTGGTCTAATACCTGAACCTCCAATAGGTTGATATAA  |
| SETD2EXON4_W_22_10.A | ACACTGACGACATGGTTCTACAAGTTCAGCTTCTGTTAATCATTTTGATGAT  | SETD2EXON4_W_22_10.B | TACGGTAGCAGAGACTTGGTCTCTGAACTTTTTTACTCTTTAGCACTGC     |
| SETD2EXON4_W_23_9.A  | ACACTGACGACATGGTTCTACATGCGGAGAGAACATCTCCAGTTCTG       | SETD2EXON4_W_23_9.B  | TACGGTAGCAGAGACTTGGTCTCAAACATTTCCAGATAAACCATTATTACG   |
| SETD2EXON4_W_24_8.A  | ACACTGACGACATGGTTCTACAGGAAGGGATTTGCTTCCAGGGAGAACAA    | SETD2EXON4_W_24_8.B  | TACGGTAGCAGAGACTTGGTCTTACAACCTCTGAGTCATCAGAAGTATGCAC  |
| SETD2EXON4_W_25_7.A  | ACACTGACGACATGGTTCTACATCTTTAGATGAAAGAGGAGAAGGAGGACAT  | SETD2EXON4_W_25_7.B  | TACGGTAGCAGAGACTTGGTCTAGAATAATCTTATGAACGTAGACACAAT    |
| SETD2EXON4_W_26_6.A  | ACACTGACGACATGGTTCTACAAGTGTGACAGTAGTGGTCATGCCCC       | SETD2EXON4_W_26_6.B  | TACGGTAGCAGAGACTTGGTCTGGGCAAGTAGAATCTTTGGCACAACCA     |
| SETD2EXON4_W_27_5.A  | ACACTGACGACATGGTTCTACAAGTATTCCAAGAAACCGTCTCCAGTCTGTT  | SETD2EXON4_W_27_5.B  | TACGGTAGCAGAGACTTGGTCTACTTTCAAATTTTTCTCATACAAATGTCT   |
| SETD2EXON4_W_28_4.A  | ACACTGACGACATGGTTCTACACATTTGGGAAGATGAGAGATTGGAGTCAAGG | SETD2EXON4_W_28_4.B  | TACGGTAGCAGAGACTTGGTCTTTCAGGCAGGCGATTATCTATTTGTTTTCT  |
| SETD2EXON4_W_29_3.A  | ACACTGACGACATGGTTCTACAACCTCGGAAATTTCTTTACACAGTCCAGT   | SETD2EXON4_W_29_3.B  | TACGGTAGCAGAGACTTGGTCTTGTCTGCTGCTAGAAGGATTTTGGCTTTCAC |
| SETD2EXON4_W_3_41.A  | ACACTGACGACATGGTTCTACAACCTCAAACCTCCAGCTGTACCTCT       | SETD2EXON4_W_3_41.B  | TACGGTAGCAGAGACTTGGTCTAGTAGCCAGCAGTGGCCTGGATG         |
| SETD2EXON4_W_30_1.A  | ACACTGACGACATGGTTCTACACCTCTGGGTCACCCAAATTCAGAGGAAA    | SETD2EXON4_W_30_1.B  | TACGGTAGCAGAGACTTGGTCTGGAAGAAAAACTCAATCTGTTTTTCCAG    |
| SETD2EXON4_W_31_48.A | ACACTGACGACATGGTTCTACAACCACTTTCAAACACAGCCAGATAGTAGA   | SETD2EXON4_W_31_48.B | TACGGTAGCAGAGACTTGGTCTCCATAGCTACTGTGAGTTGCTGATACGT    |
| SETD2EXON4_W_32_47.A | ACACTGACGACATGGTTCTACATGGGACTTCTCTCAAGAAAAGCCTTCTACC  | SETD2EXON4_W_32_47.B | TACGGTAGCAGAGACTTGGTCTACAACCCAGTTCAGGAGGCTTAC         |
| SETD2EXON4_W_33_46.A | ACACTGACGACATGGTTCTACATGGCAAGGCAATGGTTACTGGGATCC      | SETD2EXON4_W_33_46.B | TACGGTAGCAGAGACTTGGTCTGGATAGAAGAAATTTATCGGACTGGTCTGA  |
| SETD2EXON4_W_34_45.A | ACACTGACGACATGGTTCTACAATTTGGGATCAACAGGATGGATCCATTTT   | SETD2EXON4_W_34_45.B | TACGGTAGCAGAGACTTGGTCTTTTATATCATTTTTTTTCTAAGTTTTTTGA  |
| SETD2EXON4_W_35_44.A | ACACTGACGACATGGTTCTACAACCTTAGCTGTGAATGAAAAGAAGATTTT   | SETD2EXON4_W_35_44.B | TACGGTAGCAGAGACTTGGTCTGGGCACTGATGTCTCTCCCTGCTC        |
| SETD2EXON4_W_36_43.A | ACACTGACGACATGGTTCTACAGAGCTTCAAGACAGAAAGAAGATTAGAGTG  | SETD2EXON4_W_36_43.B | TACGGTAGCAGAGACTTGGTCTATTTTCTTCAATAAGATCAAAGTAACATGG  |
| SETD2EXON4_W_37_42.A | ACACTGACGACATGGTTCTACATGGAAGGAATGTGCCAAGCAAGGGA       | SETD2EXON4_W_37_42.B | TACGGTAGCAGAGACTTGGTCTCTCTTCTATGTGTTTAACTCTACAGTCT    |
| SETD2EXON4_W_4_40.A  | ACACTGACGACATGGTTCTACAGGCAAAATTCATTTAAGAAACATCTGCTT   | SETD2EXON4_W_4_40.B  | TACGGTAGCAGAGACTTGGTCTGGCTTGGCAGGTGGAGGCG             |
| SETD2EXON4_W_5_39.A  | ACACTGACGACATGGTTCTACATCAAACTGTAGACTCACCCCTCTC        | SETD2EXON4_W_5_39.B  | TACGGTAGCAGAGACTTGGTCTTTTCAAGATCTAAGTCTACATCTACTGG    |
| SETD2EXON4_W_6_38.A  | ACACTGACGACATGGTTCTACAACAGTTCTAATGGCAGCACCAGTACCC     | SETD2EXON4_W_6_38.B  | TACGGTAGCAGAGACTTGGTCTTGAGGAAATATCTGCTTGGCTCATTCAATAT |

|                      |                                                        |                      |                                                      |
|----------------------|--------------------------------------------------------|----------------------|------------------------------------------------------|
| SETD2EXON4_W_7_37.A  | ACACTGACGACATGGTTCTACATCTAATAGTTTAGAAGAACACGTAACCTCAA  | SETD2EXON4_W_7_37.B  | TACGGTAGCAGAGACTTGGTCTAAGAAAGATGCCTTCAGATTGTGAGGATTT |
| SETD2EXON4_W_8_36.A  | ACACTGACGACATGGTTCTACACTGAGCTGTAAAAAACAGGTTCTAAGAAG    | SETD2EXON4_W_8_36.B  | TACGGTAGCAGAGACTTGGTCTTTTTAAAGGTGCTGAGCTCTTTTTAAAATC |
| SETD2EXON4_W_9_35.A  | ACACTGACGACATGGTTCTACAAAATTTTCAGCAAGCATTGAAAAGGAAGA    | SETD2EXON4_W_9_35.B  | TACGGTAGCAGAGACTTGGTCTCTCTTTCTGATCTACATCGGGAAGATAC   |
| SETD2EXON5_C_1_34.A  | ACACTGACGACATGGTTCTACAGCTATTTACCTTGAGCTCTTTCATCTTTA    | SETD2EXON5_C_1_34.B  | TACGGTAGCAGAGACTTGGTCTCTAATGAGATTTGGCAGATATTTGATTATA |
| SETD2EXON5_C_2_33.A  | ACACTGACGACATGGTTCTACAATCTTCATTGATAATTTCAATATTTAGAGA   | SETD2EXON5_C_2_33.B  | TACGGTAGCAGAGACTTGGTCTCGAATGCGAGTGTGAGTGTACACCTC     |
| SETD2EXON5_W_1_32.A  | ACACTGACGACATGGTTCTACAATCAGTTTTTATGAAATTTTACCCAATAG    | SETD2EXON5_W_1_32.B  | TACGGTAGCAGAGACTTGGTCTGTATTCTAATTTACTTACCATTCAATCATG |
| SETD2EXON5_W_2_31.A  | ACACTGACGACATGGTTCTACAATGTGGGAAGATTGTCTTAATCGTCTTCT    | SETD2EXON5_W_2_31.B  | TACGGTAGCAGAGACTTGGTCTAAGTGTCTACTATACTTTTTGCTTGTAGT  |
| SETD2EXON6_C_1_30.A  | ACACTGACGACATGGTTCTACATTTCTGTGAGTATGACTTCCACATCTGCA    | SETD2EXON6_C_1_30.B  | TACGGTAGCAGAGACTTGGTCTTATATGTAGTTATACTAACACATTTTTTCA |
| SETD2EXON6_C_2_29.A  | ACACTGACGACATGGTTCTACATGCCACTGCACTCCAGTCTGGG           | SETD2EXON6_C_2_29.B  | TACGGTAGCAGAGACTTGGTCTTCCAATAGACGGTTTCAGAGAAAACAGCA  |
| SETD2EXON6_W_1_28.A  | ACACTGACGACATGGTTCTACAGAATTAATTTCTCTTTTTCTCATTTCAG     | SETD2EXON6_W_1_28.B  | TACGGTAGCAGAGACTTGGTCTGGTAATTAAGAAAGAACTTACGAAGGAAGG |
| SETD2EXON6_W_2_27.A  | ACACTGACGACATGGTTCTACAGAAAGGCTGGGGCTTGAGAGCTGC         | SETD2EXON6_W_2_27.B  | TACGGTAGCAGAGACTTGGTCTAGGCTAAGGCAGGAGAATTTGCTTGAATCC |
| SETD2EXON7_C_1_26.A  | ACACTGACGACATGGTTCTACAATGTTTTGTTTCTGTCATACTCCTCACT     | SETD2EXON7_C_1_26.B  | TACGGTAGCAGAGACTTGGTCTTATTTAAATTCCTATTTTTGCCTGAGCA   |
| SETD2EXON7_C_2_25.A  | ACACTGACGACATGGTTCTACAAAAAATAAATCAATCAGTATCAA          | SETD2EXON7_C_2_25.B  | TACGGTAGCAGAGACTTGGTCTGGTACTCGATCATAAAGAGTTTAAAGCTCG |
| SETD2EXON7_W_1_24.A  | ACACTGACGACATGGTTCTACAAAGTCTATTTTTCTTTTGGTTTGCAG       | SETD2EXON7_W_1_24.B  | TACGGTAGCAGAGACTTGGTCTAAGGCAACATATCCAAGCTGCTTACCTCA  |
| SETD2EXON7_W_2_23.A  | ACACTGACGACATGGTTCTACACCATTACTATTTTCTGCGCCTGAAGAATGA   | SETD2EXON7_W_2_23.B  | TACGGTAGCAGAGACTTGGTCTCGAGATCTTGCCACTGCACCTCCAGC     |
| SETD2EXON8_C_1_22.A  | ACACTGACGACATGGTTCTACAACCTCACTTACTTTTTGGGTTTCACAATT    | SETD2EXON8_C_1_22.B  | TACGGTAGCAGAGACTTGGTCTGATGCATAAGAGATGTATGTAGTTTTGCAG |
| SETD2EXON8_C_2_21.A  | ACACTGACGACATGGTTCTACACTTAAATAATAAAGTAGAATAGGAAAAGG    | SETD2EXON8_C_2_21.B  | TACGGTAGCAGAGACTTGGTCTCTCGTTTTCATGAATCACAGCTGTGAACCA |
| SETD2EXON8_W_1_20.A  | ACACTGACGACATGGTTCTACATTTAATTTCTTAAATGATCCTCTTCTCCCAG  | SETD2EXON8_W_1_20.B  | TACGGTAGCAGAGACTTGGTCTGGGATCTAAAATTAATGGTCAGAACAGCAA |
| SETD2EXON9_C_1_19.A  | ACACTGACGACATGGTTCTACACTGGAAGTATGATCAAACGTTAACTCTGA    | SETD2EXON9_C_1_19.B  | TACGGTAGCAGAGACTTGGTCTTATATATGCGCACACACACACACACAC    |
| SETD2EXON9_C_2_18.A  | ACACTGACGACATGGTTCTACAAGTTAAGAGTAAATATACTTTTAAAGTAAT   | SETD2EXON9_C_2_18.B  | TACGGTAGCAGAGACTTGGTCTTTTTTACCACCAAAGTGGTCTTCTCAGGC  |
| SETD2EXON9_W_1_17.A  | ACACTGACGACATGGTTCTACAAAATTTCTTTGTTTTCAAACATCATCTCAG   | SETD2EXON9_W_1_17.B  | TACGGTAGCAGAGACTTGGTCTAACAGCCTATTTCCCATCAGAAGCAGC    |
| TP53EXON1_C_1_24.A   | ACACTGACGACATGGTTCTACACAATGGATCCACTCACAGTTTCCATAGGTC   | TP53EXON1_C_1_24.B   | TACGGTAGCAGAGACTTGGTCTCAGGCCAGGTGACCCAGGG            |
| TP53EXON1_C_2_25.A   | ACACTGACGACATGGTTCTACAACAGTTGTTTTTTCAGGAAGTCTGAAAGACAA | TP53EXON1_C_2_25.B   | TACGGTAGCAGAGACTTGGTCTGAGCCCCCTCTGAGTCAAGAAACATTT    |
| TP53EXON1_W_1_26.A   | ACACTGACGACATGGTTCTACAAGCAGCCAGACTGCCTTCCGG            | TP53EXON1_W_1_26.B   | TACGGTAGCAGAGACTTGGTCTTCCACAGGCTCTGCTAGGGGG          |
| TP53EXON10_C_1_4.A   | ACACTGACGACATGGTTCTACAGGAGAATGTCAGTCTGAGTCAAGGCC       | TP53EXON10_C_1_4.B   | TACGGTAGCAGAGACTTGGTCTAGGCCCTTCAAAGCATTGGTCAAGG      |
| TP53EXON10_C_10_1.A  | ACACTGACGACATGGTTCTACACAGAATGTAAAAGATGTTGACCCTTCCAGC   | TP53EXON10_C_10_1.B  | TACGGTAGCAGAGACTTGGTCTATGCCACCATGGCCAGCCAAC          |
| TP53EXON10_C_11_2.A  | ACACTGACGACATGGTTCTACATCACCCCTCAGACACACAGGTGGC         | TP53EXON10_C_11_2.B  | TACGGTAGCAGAGACTTGGTCTGGGATTACAATTTGAGCCACCACGT      |
| TP53EXON10_C_12_3.A  | ACACTGACGACATGGTTCTACACCTCCCGAACCCGGGCACT              | TP53EXON10_C_12_3.B  | TACGGTAGCAGAGACTTGGTCTTATATCGATCTCTTATTTTACAATAAAAC  |
| TP53EXON10_C_2_5.A   | ACACTGACGACATGGTTCTACATGGAAGTCTGGGTGCTTCTGAGC          | TP53EXON10_C_2_5.B   | TACGGTAGCAGAGACTTGGTCTCTCCGCCATAAAAACTCATGTTCAAGAC   |
| TP53EXON10_C_3_6.A   | ACACTGACGACATGGTTCTACAACATCCCTCACAGTAAAAACCTTAAATCT    | TP53EXON10_C_3_6.B   | TACGGTAGCAGAGACTTGGTCTTTTTGGGTCTTTGAACCTTGTCTGCAA    |
| TP53EXON10_C_4_7.A   | ACACTGACGACATGGTTCTACAGAGAAAATTAACAGTGAGGGACAGCTTCC    | TP53EXON10_C_4_7.B   | TACGGTAGCAGAGACTTGGTCTAGGAGGATGGGGAGTAGGACATACCAGC   |
| TP53EXON10_C_5_8.A   | ACACTGACGACATGGTTCTACAGACCCATGTAATAAAAGGTGGTTTCAAGG    | TP53EXON10_C_5_8.B   | TACGGTAGCAGAGACTTGGTCTGGTAGGGGCCACTTCCACCGT          |
| TP53EXON10_C_6_9.A   | ACACTGACGACATGGTTCTACAGGCTGGGCCAGCAGAGACTTGA           | TP53EXON10_C_6_9.B   | TACGGTAGCAGAGACTTGGTCTGTGAGGGTAAATGAAATAATGTACATCTGG |
| TP53EXON10_C_7_10.A  | ACACTGACGACATGGTTCTACAAAACAAGTCTTGGTGGATCCAGATCATCAT   | TP53EXON10_C_7_10.B  | TACGGTAGCAGAGACTTGGTCTTTTCTACAGTTGGGCAGCTGGTTAGGTAGA |
| TP53EXON10_C_8_11.A  | ACACTGACGACATGGTTCTACAAGGCTGCAGTAAGCCAAGATCACGC        | TP53EXON10_C_8_11.B  | TACGGTAGCAGAGACTTGGTCTCCACACCTGGAGGATTTTCTCTTGTAT    |
| TP53EXON10_C_9_12.A  | ACACTGACGACATGGTTCTACAGCAACACTGTGAGACCCCATCTTACAA      | TP53EXON10_C_9_12.B  | TACGGTAGCAGAGACTTGGTCTGGGTCTCGCTTTTGTGCCAGG          |
| TP53EXON10_W_1_15.A  | ACACTGACGACATGGTTCTACAATCTCTCTCCCTGCTTCTGTCTCTAC       | TP53EXON10_W_1_15.B  | TACGGTAGCAGAGACTTGGTCTCCAAAATGGCAGGGGAGGGAGA         |
| TP53EXON10_W_10_13.A | ACACTGACGACATGGTTCTACACCAGGCTGGTCTCAAACCTCTGGG         | TP53EXON10_W_10_13.B | TACGGTAGCAGAGACTTGGTCTAAATGGGATATAAAAGGGAGAAGGAGGGG  |
| TP53EXON10_W_11_14.A | ACACTGACGACATGGTTCTACACAAGCAGATCTGCATTTTACCCACC        | TP53EXON10_W_11_14.B | TACGGTAGCAGAGACTTGGTCTTCCAGCACCTCTCACTCAC            |

|                     |                                                      |                     |                                                        |
|---------------------|------------------------------------------------------|---------------------|--------------------------------------------------------|
| TP53EXON10_W_2_16.A | ACACTGACGACATGGTTCTACAACCTCTTGTTCCCACTGACAGCCTC      | TP53EXON10_W_2_16.B | TACGGTAGCAGAGACTTGGTCTCCCCACAACAAAACACCAAGTGCAGG       |
| TP53EXON10_W_3_17.A | ACACTGACGACATGGTTCTACATTTGCTTTGTCCCGGGGCTCCA         | TP53EXON10_W_3_17.B | TACGGTAGCAGAGACTTGGTCTTAAGAATGTGGCTGATTGTAACCTAACCCCTT |
| TP53EXON10_W_4_18.A | ACACTGACGACATGGTTCTACATTGGGAGATGTAAGAAATGTTCTTGCAAGT | TP53EXON10_W_4_18.B | TACGGTAGCAGAGACTTGGTCTAATGCACTCTGTGAGGTAGGTGCAAAATGC   |
| TP53EXON10_W_5_19.A | ACACTGACGACATGGTTCTACATAACTCAAGGCCATATCTGTGAAATGCT   | TP53EXON10_W_5_19.B | TACGGTAGCAGAGACTTGGTCTTACCAACCCACCCGACCAACAGGG         |
| TP53EXON10_W_6_20.A | ACACTGACGACATGGTTCTACATAGAACTTGACCCCTTGAGGGTGCT      | TP53EXON10_W_6_20.B | TACGGTAGCAGAGACTTGGTCTGATGGGGTGAGATTCTCTTTAGTACTAA     |
| TP53EXON10_W_7_21.A | ACACTGACGACATGGTTCTACAAAACCTGTCTGACAACTCTTGTTGTAAC   | TP53EXON10_W_7_21.B | TACGGTAGCAGAGACTTGGTCTAGTCTCAAAGAAAAGAAAAAAAAAAAAA     |
| TP53EXON10_W_8_22.A | ACACTGACGACATGGTTCTACATATGCTCAGGGTCAATTTCTTTTTCTTTT  | TP53EXON10_W_8_22.B | TACGGTAGCAGAGACTTGGTCTGAACTGTGGTCCAGCTACTCCG           |
| TP53EXON10_W_9_23.A | ACACTGACGACATGGTTCTACATTGCTCCCGGCTCGAGCA             | TP53EXON10_W_9_23.B | TACGGTAGCAGAGACTTGGTCTGCACTCTGGGAGGCTGAGACAGG          |
| TP53EXON2_C_1_27.A  | ACACTGACGACATGGTTCTACAAGCCCCCAGCCCCCAGCC             | TP53EXON2_C_1_27.B  | TACGGTAGCAGAGACTTGGTCTCCACCACCCCAACCCCAACC             |
| TP53EXON2_W_1_28.A  | ACACTGACGACATGGTTCTACATGGGACTGACTTTCTGCTCTGTCTTTAG   | TP53EXON2_W_1_28.B  | TACGGTAGCAGAGACTTGGTCTTGGGACGGCAAGGGGGACT              |
| TP53EXON3_C_1_30.A  | ACACTGACGACATGGTTCTACATTCATCTGGACCTGGGTCTTCAGTGAACC  | TP53EXON3_C_1_30.B  | TACGGTAGCAGAGACTTGGTCTGGGACCTGGAGGGCTGGG               |
| TP53EXON3_C_2_31.A  | ACACTGACGACATGGTTCTACAGTTTTCTGGGAAGGGACAGAAGATGACA   | TP53EXON3_C_2_31.B  | TACGGTAGCAGAGACTTGGTCTTGTGCTGTCCCGGACGATATTGAA         |
| TP53EXON3_C_3_32.A  | ACACTGACGACATGGTTCTACATACGGCCAGGCATTGAAGTCTCATGG     | TP53EXON3_C_3_32.B  | TACGGTAGCAGAGACTTGGTCTGCGGCCCTGCACCAGCCCC              |
| TP53EXON3_W_1_33.A  | ACACTGACGACATGGTTCTACACCTCTGACTGCTTTTTACCCCATCTACAG  | TP53EXON3_W_1_33.B  | TACGGTAGCAGAGACTTGGTCTGGGTGTAGGAGCTGCTGGTGCA           |
| TP53EXON3_W_2_34.A  | ACACTGACGACATGGTTCTACAGCTCCAGAATGCCAGAGGCTGC         | TP53EXON3_W_2_34.B  | TACGGTAGCAGAGACTTGGTCTCAGACTTGGTGTCCAGAATGC            |
| TP53EXON3_W_3_35.A  | ACACTGACGACATGGTTCTACATACCAGGGCAGCTACGGTTTTCCG       | TP53EXON3_W_3_35.B  | TACGGTAGCAGAGACTTGGTCTACAGGAAGCCAAAGGGTGAAGAGGAATC     |
| TP53EXON4_C_1_36.A  | ACACTGACGACATGGTTCTACAGGTCCGGGCGGGGGTGTGG            | TP53EXON4_C_1_36.B  | TACGGTAGCAGAGACTTGGTCTCATGTTTCTTTGCTGCGCTCTCCA         |
| TP53EXON4_C_2_37.A  | ACACTGACGACATGGTTCTACATCGTCTCCAGCCCCAGCTGC           | TP53EXON4_C_2_37.B  | TACGGTAGCAGAGACTTGGTCTCACTGGCCAAGACTGCCCTGT            |
| TP53EXON4_C_3_38.A  | ACACTGACGACATGGTTCTACAGTCATCCAAATACTCCACACGCAAATTTCC | TP53EXON4_C_3_38.B  | TACGGTAGCAGAGACTTGGTCTTCCCCCACCATGAGCGCTG              |
| TP53EXON4_W_1_39.A  | ACACTGACGACATGGTTCTACATCAACTCTGTCTCTCTCTCTCTACAG     | TP53EXON4_W_1_39.B  | TACGGTAGCAGAGACTTGGTCTGCGCCTCACAACTCCGTCATG            |
| TP53EXON4_W_2_40.A  | ACACTGACGACATGGTTCTACACGCGTCCGCGCCATGGCCAT           | TP53EXON4_W_2_40.B  | TACGGTAGCAGAGACTTGGTCTCAGACCTAAGAGCAATCAGTGAGGAATCAG   |
| TP53EXON5_C_1_41.A  | ACACTGACGACATGGTTCTACACCACATATGTCGAAAAGTGTCTGTGCAT   | TP53EXON5_C_1_41.B  | TACGGTAGCAGAGACTTGGTCTATAGCGATGGTGAGCAGCTGGGG          |
| TP53EXON5_C_2_42.A  | ACACTGACGACATGGTTCTACAATAAGCAGCAGGAGAAAGCCCCC        | TP53EXON5_C_2_42.B  | TACGGTAGCAGAGACTTGGTCTTGAAGGAAATTTGCGTGTGGAGATTTGG     |
| TP53EXON5_W_1_43.A  | ACACTGACGACATGGTTCTACAGGCCCTGATTCTCACTGATTGTCTCT     | TP53EXON5_W_1_43.B  | TACGGTAGCAGAGACTTGGTCTAACCCCTCTCCAGAGACCCC             |
| TP53EXON6_C_1_44.A  | ACACTGACGACATGGTTCTACAGATGGTGAGGATGGGCCTCCGG         | TP53EXON6_C_1_44.B  | TACGGTAGCAGAGACTTGGTCTTCTAAAAAAGAGGCCTCCCT             |
| TP53EXON6_C_2_45.A  | ACACTGACGACATGGTTCTACATAGTATGGAAGAAATCGGTAAGAGGTGGGC | TP53EXON6_C_2_45.B  | TACGGTAGCAGAGACTTGGTCTAACTACATGTGTAACAGTTCTGTCATGGGC   |
| TP53EXON6_W_1_46.A  | ACACTGACGACATGGTTCTACAGCCTCATCTGGGCTGTGTTATCTCC      | TP53EXON6_W_1_46.B  | TACGGTAGCAGAGACTTGGTCTCAGCAGGCCAGTGTGCAGG              |
| TP53EXON7_C_1_47.A  | ACACTGACGACATGGTTCTACATTGCGGAGATTCTCTCTCTGTGCG       | TP53EXON7_C_1_47.B  | TACGGTAGCAGAGACTTGGTCTGGGAGTAGATGGAGCCTGGTTTTTAAT      |
| TP53EXON7_C_2_48.A  | ACACTGACGACATGGTTCTACAAGGTGATAAAAGTGAATCTGAGGCATAACT | TP53EXON7_C_2_48.B  | TACGGTAGCAGAGACTTGGTCTGGTGGTGTGTTGTGCTGTCTCT           |
| TP53EXON7_W_1_1.A   | ACACTGACGACATGGTTCTACACTCTGCTCTCTTTCTATCTCTGAGTAG    | TP53EXON7_W_1_1.B   | TACGGTAGCAGAGACTTGGTCTCTGCTTCTTACCTGCTTAGTGC           |
| TP53EXON7_W_2_2.A   | ACACTGACGACATGGTTCTACAGAAAGGGAGCCTACCACGAGC          | TP53EXON7_W_2_2.B   | TACGGTAGCAGAGACTTGGTCTTCTTTGGCTGGGAGAGGAGCTG           |
| TP53EXON8_C_1_3.A   | ACACTGACGACATGGTTCTACATCCAAGACTTAGTACCTGAAGGGTGAAT   | TP53EXON8_C_1_3.B   | TACGGTAGCAGAGACTTGGTCTAAGCAAGCAGACAAGAAGCGGTG          |
| TP53EXON8_C_2_4.A   | ACACTGACGACATGGTTCTACAAGCCATTGTCTTTGAGGCATCACTGC     | TP53EXON8_C_2_4.B   | TACGGTAGCAGAGACTTGGTCTAGCCAAGAAGAAACCACTGGATGGAGAA     |
| TP53EXON8_W_1_5.A   | ACACTGACGACATGGTTCTACATTTATCACCTTCTGCTCTTCTCTAG      | TP53EXON8_W_1_5.B   | TACGGTAGCAGAGACTTGGTCTCAGTCAAGAAGAAACCGCATTTTGTAGTGT   |
| TP53EXON9_C_1_6.A   | ACACTGACGACATGGTTCTACACCCCTGGCTCTTCCAG               | TP53EXON9_C_1_6.B   | TACGGTAGCAGAGACTTGGTCTGTCATAAAGTCAAACAATTGTAACCTGAA    |
| TP53EXON9_C_2_7.A   | ACACTGACGACATGGTTCTACATCAGCTGCCTTTGACCATGAAGGCA      | TP53EXON9_C_2_7.B   | TACGGTAGCAGAGACTTGGTCTGAGAGCTGAATGAGGCCTTGGAACT        |
| TP53EXON9_W_1_8.A   | ACACTGACGACATGGTTCTACACTTACTCTCCCTCTCTGTTGCTG        | TP53EXON9_W_1_8.B   | TACGGTAGCAGAGACTTGGTCTGAAGGCAGGGGAGTAGGGCCAG           |
